# Supplementary material for: Sustainable Materials and their Contribution to the Sustainable Development Goals (SDGs): A Critical Review Based on an Italian Example
Source: Molecules. 2021 Mar 5;26(5):1407. doi: 10.3390/molecules26051407 (PMC7961538; doi:10.3390/molecules26051407)
Supplement: Supplementary file 1 [file molecules-26-01407-s001.xls]

## Sheet: Supplementary material
Table S1 (supporting): List of all the papers published by the research INSTM units working in sustainable materials (Authors, articles title, source title, abstract ORCIDs, publication year and DOI are reported)
Authors	Article Title	Source Title	Abstract	ORCIDs	Publication Year	DOI
Braccini, S; Pecorini, G; Chiellini, F; Bakos, D; Miertus, S; Frecer, V	Adhesion of fibroblast cells on thin films representing surfaces of polymeric scaffolds of human urethra rationalized by molecular models of integrin binding cell adhesion on polymeric scaffolds for regenerative medicine	JOURNAL OF BIOTECHNOLOGY	This work combines experimental and computational study of Balb/3T3 clone A31 mouse embryo fibroblasts cell line adhesion and proliferation on fourteen different polymeric surfaces prepared from poly(dioxanone) (PDO), poly(glycolic acid) (PGA), poly(hydroxybutyrate) (PHB), and poly(L-lactic acid) (PLA), and their 1:1 mixtures. The study was done with the aim to explore the attractive interactions…	Chiellini, Federica/0000-0003-4680-9975	2020	10.1016/j.jbiotec.2020.11.001
Manfredi, N; Decavoli, C; Boldrini, CL; Dolla, TH; Faroldi, F; Sansone, F; Montini, T; Baldini, L; Fornasiero, P; Abbotto, A	Multibranched Calix[4]arene-Based Sensitizers for Efficient Photocatalytic Hydrogen Production	EUROPEAN JOURNAL OF ORGANIC CHEMISTRY	In the field of direct production of hydrogen from solar energy and water, photocatalytic methods hold great potential especially when metal-free molecular components are preferred. In this work, we have developed a new class of calix[4]arene-based molecular photosensitizers to be used as antenna systems in the photocatalytic production of hydrogen. The structure of the dyes has a typical donor-p…	Fornasiero, Paolo/0000-0003-1082-9157		10.1002/ejoc.202001296
Valentini, F; Dorigato, A; Rigotti, D; Pegoretti, A	Evaluation of the role of devulcanized rubber on the thermomechanical properties of expanded ethylene-propylene diene monomers composites	POLYMER ENGINEERING AND SCIENCE	Various amounts of both devulcanized (DR) and non-devulcanized (NDR) recycled rubber were melt compounded with a virgin ethylene-propylene diene monomer (EPDM) rubber. The resulting compounds were then expanded by using azodicarbonamide. The role played by the presence of DR or NDR on the thermomechanical properties of the obtained materials was evaluated. Electron scanning microscope micrographs…	Valentini, Francesco/0000-0001-9496-0501		10.1002/pen.25615
Merighi, S; Mazzocchetti, L; Benelli, T; Giorgini, L	Adenine as Epoxy Resin Hardener for Sustainable Composites Production with Recycled Carbon Fibers and Cellulosic Fibers	POLYMERS	In this work, Adenine is proposed, for the first time, as a cross-linker for epoxy resins. Adenine is an amino-substituted purine with heterocyclic aromatic structure showing both proton donors, and hydrogen bonding ability. DSC studies show that adenine is able to positively cross-link a biobased DGEBA-like commercial epoxy precursor with good thermal performance and a reaction mechanism based o…		2020	10.3390/polym12123054
D'Alessandro, A; Coffetti, D; Crotti, E; Coppola, L; Meoni, A; Ubertini, F	Self-Sensing Properties of Green Alkali-Activated Binders with Carbon-Based Nanoinclusions	SUSTAINABILITY	This paper is aimed at investigating the self-sensing properties of Portland-free alkali-activated binders doped with carbon-based nanofillers. Four different inclusions (carbon nanotubes, carbon nanofibers, carbon black and graphene nanoplatelets) were added into the matrix in the same amount. The physical and electromechanical properties were analyzed. The self-sensing capabilities of the sampl…	D'Alessandro, Antonella/0000-0003-2928-1961; Ubertini, Filippo/0000-0002-5044-8482	2020	10.3390/su12239916
Cringoli, MC; Marchesan, S; Melchionna, M; Fornasiero, P	Nanostructured Gels for Energy and Environmental Applications	MOLECULES	Nanostructured gels have emerged as an attractive functional material to innovate the field of energy, with applications ranging from extraction and purification to nanocatalysts with unprecedented performance. In this review we discuss the various classes of nanostructured gels and the most recent advancements in the field with a perspective on future directions of this challenging area.	Fornasiero, Paolo/0000-0003-1082-9157; Marchesan, Silvia/0000-0001-6089-3873; Cringoli, Maria Cristina/0000-0003-0196-4525	2020	10.3390/molecules25235620
Porcu, S; Castellino, M; Roppolo, I; Carbonaro, CM; Palmas, S; Mais, L; Casula, MF; Neretina, S; Hughes, RA; Secci, F; Ricci, PC	Highly efficient visible light phenyl modified carbon nitride/TiO2 photocatalyst for environmental applications	APPLIED SURFACE SCIENCE	Eco-sustainable solutions for the neutralization of air and water pollutants have increasingly gravitated toward the use of heterogeneous photocatalysts. This approach, which transforms pollutants into harmless substances through a light-driven chemical reaction on a catalytic surface, must comply with eco-sustainability requirements and be easily applicable. Semiconductor-based photocatalysis is…	MAIS, LAURA/0000-0003-4861-0548	2020	10.1016/j.apsusc.2020.147394
Ceriani, C; Ghiglietti, E; Sassi, M; Mattiello, S; Beverina, L	Taming Troublesome Suzuki-Miyaura Reactions in Water Solution of Surfactants by the Use of Lecithin: A Step beyond the Micellar Model	ORGANIC PROCESS RESEARCH & DEVELOPMENT	The use of water solutions of industrial and designer surfactants enables performing a wide variety of chemical transformations on hydrophobic precursors. Most reactions are clean, fast, and efficient with vast benefits for overall sustainability. The widespread adoption of such methods is somewhat hampered by a lack of generality in the case of troublesome substrates and scaling up. The common l…	MATTIELLO, SARA/0000-0002-2907-0964	2020	10.1021/acs.oprd.0c00285
Mariotti, N; Bonomo, M; Fagiolari, L; Barbero, N; Gerbaldi, C; Bella, F; Barolo, C	Recent advances in eco-friendly and cost-effective materials towards sustainable dye-sensitized solar cells	GREEN CHEMISTRY	Dye-sensitized solar cells (DSSCs), as emerging photovoltaic technology, have been thoroughly and extensively investigated in the last three decades. Since their first appearance in 1991, DSSCs have gained increasing attention and have been classified as feasible alternatives to conventional photovoltaic devices due to their numerous advantages, such as cheap and simple preparation methods, the p…	Bonomo, Matteo/0000-0002-1944-2664; Bella, Federico/0000-0002-2282-9667; BARBERO, Nadia/0000-0001-6421-3492; Fagiolari, Lucia/0000-0003-0441-6647; Barolo, Claudia/0000-0003-0627-2579	2020	10.1039/d0gc01148g
Cornelio, A; Zanoletti, A; Federici, S; Depero, LE; Bontempi, E	Porous Materials Derived from Industrial By-Products for Titanium Dioxide Nanoparticles Capture	APPLIED SCIENCES-BASEL	The aim of this paper was the evaluation of hybrid porous materials, named SUNSPACE (SUstaiNable materials Synthesized from by-Products and Alginates for Clean air and better Environment), realized with raw materials such as silica fume (SUNSPACE SF) and bottom ash derived from municipal solid waste incineration (SUNSPACE BA), compared to cement and leaf for particulate matter (PM) entrapment. SU…	Bontempi, Elza/0000-0003-1656-7506; FEDERICI, Stefania/0000-0001-7118-8766	2020	10.3390/app10228086
Carbone, K; De Angelis, A; Mazzuca, C; Santangelo, E; Macchioni, V; Cacciotti, I; Petrella, G; Cicero, DO; Micheli, L	Microwave-assisted synthesis of catalytic silver nanoparticles by hyperpigmented tomato skins: A green approach	LWT-FOOD SCIENCE AND TECHNOLOGY	A sustainable approach for the green synthesis of silver nanoparticles (AgNPs) using an aqueous extract of hyperpigmented tomato (Solanum lycopersicum L) skins (HTS) was described. AgNPs characterization and catalytic activity in the degradation of methylene blue were reported. The influence of some experimental parameters on synthesis, such as green extract concentration, pH, microwave irradiati…		2020	10.1016/j.lwt.2020.110088
Balart, R; Montanes, N; Dominici, F; Boronat, T; Torres-Giner, S	Environmentally Friendly Polymers and Polymer Composites	MATERIALS	In the last decade, continuous research advances have been observed in the field of environmentally friendly polymers and polymer composites due to the dependence of polymers on fossil fuels and the sustainability issues related to plastic wastes. This research activity has become much more intense in the food packaging industry due to the high volume of waste it generates. Biopolymers are nowada…	Torres-Giner, Sergio/0000-0001-9071-9542; Boronat, Teodomiro/0000-0002-2144-2874; Dominici, Franco/0000-0003-4861-7520; Balart, Rafael/0000-0001-5670-7126	2020	10.3390/ma13214892
Bigiani, L; Maccato, C; Andreu, T; Gasparotto, A; Sada, C; Modin, E; Lebedev, OI; Morante, JR; Barreca, D	Quasi-1D Mn2O3 Nanostructures Functionalized with First-Row Transition-Metal Oxides as Oxygen Evolution Catalysts	ACS APPLIED NANO MATERIALS	The development of cheap and efficient catalysts for the oxygen evolution reaction (OER) plays a critical role for sustainable energy conversion and storage. Herein, we report on Mn2O3-based systems supported on nickel foams and functionalized with first-row transition-metal (Fe, Co, Ni) oxide nanoparticles (NPs) as OER electrocatalysts in alkaline media, fabricated by a plasma-assisted process. …	Andreu, Teresa/0000-0002-2804-4545; Sada, Cinzia/0000-0002-7607-0481	2020	10.1021/acsanm.0c01951
Milazzo, RG; Privitera, SMS; Scalese, S; Monforte, F; Bongiorno, C; Condorelli, GG; Lombardo, SA	Ultralow loading electroless deposition of IrOx on nickel foam for efficient and stable water oxidation catalysis	INTERNATIONAL JOURNAL OF HYDROGEN ENERGY	Photocatalysis and electrolysis are crucial processes for the development of a sustainable, clean energy system, since they enable solar fuel production, such as hydrogen by water splitting, as well as CO2 reduction. In these processes efficient and robust catalysts for water oxidation are required and the reduction of employed amount of noble metals is crucial to reduce costs and increase the su…	Milazzo, Rachela Gabriella/0000-0002-3840-2297	2020	10.1016/j.ijhydene.2020.07.049
Zablocki, J; Schulz, M; Schnakenburg, G; Beverina, L; Warzanowski, P; Revelli, A; Gruninger, M; Balzer, F; Meerholz, K; Lutzen, A; Schiek, M	Structure and Dielectric Properties of Anisotropic n-Alkyl Anilino Squaraine Thin Films	JOURNAL OF PHYSICAL CHEMISTRY C	Solution-processed and thermally annealed thin films from a series of n-alkyl terminated anilino squaraines are systematically investigated regarding their structural and optical properties by means of X-ray diffraction (XRD) and spectroscopic ellipsometry (SE). Their characteristic intense double-hump-shaped absorbance spectra consisting of coupled H-aggregate and intermolecular charge transfer …	Balzer, Frank/0000-0002-6228-6839	2020	10.1021/acs.jpcc.0c07498
Sawalha, S; Milano, F; Guascito, MR; Bettini, S; Giotta, L; Operamolla, A; Da Ros, T; Prato, M; Valli, L	Improving 2D-organization of fullerene Langmuir-Schafer thin films by interaction with cellulose nanocrystals	CARBON	Cellulose nanocrystals (CNCs) are renewable, sustainable and biocompatible nanomaterials, which have gained great attention in last years for their potentialities in several fields of application. With their polyelectrolyte behaviour, sulphated CNCs are suitable to produce multilayered architectures with cationic molecules. In this work, we have investigated the ability of anionic CNCs to assist …	Milano, Francesco/0000-0001-5453-2051; Sawalha, Shadi/0000-0002-0181-9566	2020	10.1016/j.carbon.2020.05.084
Domestici, C; Tensi, L; Zaccaria, F; Kissimina, N; Valentini, M; D'Amato, R; Costantino, F; Zuccaccia, C; Macchioni, A	Molecular and heterogenized dinuclear Ir-Cp* water oxidation catalysts bearing EDTA or EDTMP as bridging and anchoring ligands	SCIENCE BULLETIN	The development of efficient water oxidation catalysts (WOCs) is of key importance in order to drive sustainable reductive processes aimed at producing renewable fuels. Herein, two novel dinuclear complexes, [(Cp*Ir)(2)(mu-kappa(3)-O,N,O-H-4-EDTMP)] (Ir-H-4-EDTMP, H-4-EDTMP4 = ethylenediamine tetra(methylene phosphonate)) and [(Cp*Ir)(2)(mu-kappa(3)-O,N,O-EDTA)] (Ir-EDTA, EDTA(4) = ethylenediamin…	D'Amato, Roberto/0000-0001-8519-0568; Tensi, Leonardo/0000-0002-0966-6859	2020	10.1016/j.scib.2020.06.015
Wang, Q; Yu, Z; Feng, JT; Fornasiero, P; He, YF; Li, DQ	Insight into the Effect of Dual Active Cu-0/Cu+ Sites in a Cu/ZnO-Al2O3 Catalyst on 5-Hydroxylmethylfurfural Hydrodeoxygenation	ACS SUSTAINABLE CHEMISTRY & ENGINEERING	The production of biofuel 2,5-dimethylfuran (DMF) from an important biomass platform of 5-hydroxymethyl furfural (HMF) involves a complicated reaction pathway due to the competition of C=O hydrogenation and C-O hydrogenolysis; however, the dependence of formed intermediates and catalytic sites needs to be further identified. Herein, we constructed a highly efficient and selective Cu/ZnO-Al2O3 cat…	Fornasiero, Paolo/0000-0003-1082-9157	2020	10.1021/acssuschemeng.0c05235
Lilli, M; Sarasini, F; Di Fausto, L; Gonzalez, C; Fernandez, A; Lopes, CS; Tirillo, J	Chemical Regeneration of Thermally Conditioned Basalt Fibres	APPLIED SCIENCES-BASEL	The disposal of fibre reinforced composite materials is a problem widely debated in the literature. This work explores the ability to restore the mechanical properties of thermally conditioned basalt fibres through chemical treatments. Inorganic acid (HF) and alkaline (NaOH) treatments proved to be effective in regenerating the mechanical strength of recycled basalt fibres, with up to 94% recover…		2020	10.3390/app10196674
Pustovarov, VA; Ivanovskikh, KV; Kiselev, SA; Trofimova, ES; Omelkov, S; Bettinelli, M	Testing performance of Pr3+-doped KLuP2O7 upon UV-, synchrotron X-ray and cathode-ray excitation	OPTICAL MATERIALS	The luminescent characteristics of the double phosphate KLuP2O7 doped with Pr3+ ions, a promising optical material for scintillator applications, were investigated using various experimental spectroscopic techniques. KLuP2O7:Pr3+ shows Pr3+ emission associated with interconfigurational 4f(1)5d(1)-> 4f(2) transitions located in the UV range (250-320 nm), intraconfigurational 4f(2)-> 4f(2) transiti…	Ivanovskikh, Konstantin/0000-0003-1675-1637	2020	10.1016/j.optmat.2020.110234
Chen, E; Bevilacqua, M; Tavagnacco, C; Montini, T; Yang, CM; Fornasiero, P	High surface area N/O co-doped carbon materials: Selective electrocatalysts for O-2 reduction to H2O2	CATALYSIS TODAY	The search for a sustainable process for production of hydrogen peroxide (H2O2) is receiving a great attention in the last years in view of its possible use as a clean oxidant in the chemical industry or for decontamination of water streams. In this context, the electrochemical approach is particularly interesting, since it can use electricity produced from solar light through photovoltaic panels…	TAVAGNACCO, CLAUDIO/0000-0003-0704-8210; MONTINI, Tiziano/0000-0001-9515-566X; Fornasiero, Paolo/0000-0003-1082-9157	2020	10.1016/j.cattod.2019.06.034
Sole, J; Samso, R; Garcia-Ladona, E; Garcia-Olivares, A; Ballabrera-Poy, J; Madurell, T; Turiel, A; Osychenkoa, O; Alvarez, D; Bardi, U; Baumann, M; Buchmann, K; Capellan-Perez, I; Cerny, M; Carpintero, O; De Blas, I; De Castro, C; De Lathouwer, JD; Duce, C; Eggler, L; Enriquez, JM; Falsini, S; Feng, K; Ferreras, N; Frechoso, F; Hubacek, K; Jones, A; Kaclikova, R; Kerschner, C; Kimmich, C; Lobejo…	Modelling the renewable transition: Scenarios and pathways for a decarbonized future using pymedeas, a new open-source energy systems model	RENEWABLE & SUSTAINABLE ENERGY REVIEWS	This paper reviews different approaches to modelling the energy transition towards a zero carbon economy. It identifies a number of limitations in current approaches such as a lack of consideration of out-of-equilibrium situations (like an energy transition) and non-linear feedbacks. To tackle those issues, the new open source integrated assessment model pymedeas is introduced, which allows the e…	Escudero, Fernando A. Frechoso/0000-0002-1119-9217; Bardi, Ugo/0000-0003-2240-2070; Garcia-Ladona, Emilio/0000-0002-0461-8639; Capellan-Perez, Inigo/0000-0002-3098-8027; Miguel, Luis J/0000-0002-8243-8596; , Jaime/0000-0002-8925-4319; Kimmich, Christian/0000-0001-8638-8808; Perissi, Ilaria/0000-0001-8996-2748; Sara, Falsini/0000-0003-2953-4025	2020	10.1016/j.rser.2020.110105
Bertolino, V; Cavallaro, G; Milioto, S; Lazzara, G	Polysaccharides/Halloysite nanotubes for smart bionanocomposite materials	CARBOHYDRATE POLYMERS	Biopolymers as alternative to fossils-derived polymers are attracting the interest of researcher in material science. Besides the economic advantages, the sustainability makes polysaccharides ideal candidates to prepare films and formulations. The addition of Halloysite nanotubes as green inorganic fillers was exploited to improve the physico-chemical properties and to introduce smart response ab…	Lazzara, Giuseppe/0000-0003-1953-5817; , Giuseppe/0000-0002-2145-0161	2020	10.1016/j.carbpol.2020.116502
Vacca, MA; Cara, C; Mameli, V; Angotzi, MS; Scorciapino, MA; Cutrufello, MG; Musinu, A; Tyrpekl, V; Pala, L; Cannas, C	Hexafluorosilicic Acid (FSA): from Hazardous Waste to Precious Resource in Obtaining High Value-Added Mesostructured Silica	ACS SUSTAINABLE CHEMISTRY & ENGINEERING	In this work, industrial waste hexafluorosilicic acid (H2SiF6 or FSA) has been proven to be a low-cost alternative to silicate esters for the synthesis of high-quality MCM-41 (high surface area, high degree of order, narrow pore size distribution, high thermal stability) through a head-to-head comparison between the most common silica precursor, tetraethylorthosilicate (TEOS), and FSA. The effect…	Angotzi, Marco Sanna/0000-0003-1593-5872; Tyrpekl, Vaclav/0000-0001-7149-1343; SCORCIAPINO, MARIANO ANDREA/0000-0001-7502-7265	2020	10.1021/acssuschemeng.0c03218
Ruggeri, E; Kim, DY; Cao, YT; Fare, S; De Nardo, L; Marelli, B	A Multilayered Edible Coating to Extend Produce Shelf Life	ACS SUSTAINABLE CHEMISTRY & ENGINEERING	In this study, a new edible coating material with enhanced mechanical and gas barrier properties was studied by coupling silk fibroin (SF) with poly(vinyl alcohol) (PVOH). SF and PVOH water suspensions were mixed at different ratios to form multilayered membranes that, after a phase separation, assembled on the surface of fresh-cut produce upon dip coating. The effects of the mixing ratio on tran…	Cao, Yunteng/0000-0002-6425-7628; Kim, Doyoon/0000-0001-9496-5556; Fare', Silvia/0000-0002-0303-1131; Marelli, Benedetto/0000-0001-5311-6961	2020	10.1021/acssuschemeng.0c03365
Bigiani, L; Gasparotto, A; Andreu, T; Verbeeck, J; Sada, C; Modin, E; Lebedev, OI; Morante, JR; Barreca, D; Maccato, C	Au-Manganese Oxide Nanostructures by a Plasma-Assisted Process as Electrocatalysts for Oxygen Evolution: A Chemico-Physical Investigation	ADVANCED SUSTAINABLE SYSTEMS	Earth-abundant and eco-friendly manganese oxides are promising platforms for the oxygen evolution reaction (OER) in water electrolysis. Herein, a versatile and potentially scalable route to gold-decorated manganese oxide-based OER electrocatalysts is reported. In particular, MnxOy(MnO2, Mn2O3) host matrices are grown on conductive glasses by plasma assisted-chemical vapor deposition (PA-CVD), and…	Maccato, Chiara/0000-0001-6368-5754; Modin, Evgeny/0000-0002-7403-7610		10.1002/adsu.202000177
Cedrati, V; Pacini, A; Nitti, A; de Ilarduya, AM; Munoz-Guerra, S; Sanyal, A; Pasini, D	Clickable bacterial poly(gamma-glutamic acid)	POLYMER CHEMISTRY	Poly(gamma-glutamic acid) (gamma-PGA) is one of the few bacterial polymers in nature; as such, it possesses the added value of a green birth (fermentation) and green death (biodegradability), which is ideal for sustainable macromolecular platforms. Efficient functionalization strategies are required in order to transform the native bacterial biopolymer into a material with tailored properties for…	Pasini, Dario/0000-0002-8273-3798; de Ilarduya, Antxon Martinez/0000-0001-8105-2168; Nitti, Andrea/0000-0002-7232-5707; Munoz-Guerra, Sebastian/0000-0002-4273-2301; /0000-0001-5122-8329	2020	10.1039/d0py00843e
Bigiani, L; Gasparotto, A; Maccato, C; Sada, C; Verbeeck, J; Andreu, T; Morante, JR; Barreca, D	Dual Improvement of beta-MnO(2)Oxygen Evolution Electrocatalysts via Combined Substrate Control and Surface Engineering	CHEMCATCHEM	The development of catalysts with high intrinsic activity towards the oxygen evolution reaction (OER) plays a critical role in sustainable energy conversion and storage. Herein, we report on the development of efficient (photo)electrocatalysts based on functionalized MnO(2)systems. Specifically,beta-MnO(2)nanostructures grown by plasma enhanced-chemical vapor deposition on fluorine-doped tin oxid…	Maccato, Chiara/0000-0001-6368-5754; Bigiani, Lorenzo/0000-0001-7404-2340; Sada, Cinzia/0000-0002-7607-0481; Andreu, Teresa/0000-0002-2804-4545	2020	10.1002/cctc.202000999
Wang, W; Duong-Viet, C; Tuci, G; Liu, YF; Rossin, A; Luconi, L; Nhut, JM; Nguyen-Dinh, L; Giambastiani, G; Pham-Huu, C	Highly Nickel-Loaded gamma-Alumina Composites for a Radiofrequency-Heated, Low-Temperature CO2 Methanation Scheme	CHEMSUSCHEM	In this work, we joined highly Ni-loaded gamma-Al2O3 composites, straightforwardly prepared by impregnation methods, with an induction heating setup suited to control, almost in real-time, any temperature swing at the catalyst sites (i. e., hot spots ignition) caused by an exothermic reaction at the heart of the power-to-gas (P2G) chain: CO(2)methanation. We have shown how the combination of a po…	Giambastiani, Giuliano/0000-0002-0315-3286	2020	10.1002/cssc.202001885
Bigiani, L; Andreu, T; Maccato, C; Fois, E; Gasparotto, A; Sada, C; Tabacchi, G; Krishnan, D; Verbeeck, J; Morante, JR; Barreca, D	Engineering Au/MnO(2)hierarchical nanoarchitectures for ethanol electrochemical valorization	JOURNAL OF MATERIALS CHEMISTRY A	The design of eco-friendly electrocatalysts for ethanol valorization is an open challenge towards sustainable hydrogen production. Herein we present an original fabrication route to effective electrocatalysts for the ethanol oxidation reaction (EOR). In particular, hierarchical MnO(2)nanostructures are grown on high-area nickel foam scaffolds by a plasma-assisted strategy and functionalized with …	tabacchi, gloria/0000-0002-1988-6775; Maccato, Chiara/0000-0001-6368-5754; Andreu, Teresa/0000-0002-2804-4545; Morante, J.R./0000-0002-4981-4633	2020	10.1039/d0ta05972b
Malara, A; Panto, F; Santangelo, S; Antonucci, PL; Fiore, M; Longoni, G; Ruffo, R; Frontera, P	Comparative life cycle assessment of Fe2O3-based fibers as anode materials for sodium-ion batteries	ENVIRONMENT DEVELOPMENT AND SUSTAINABILITY	Sodium-ion batteries (SIBs) potentially represent a more sustainable, less expensive and environmentally friendly alternative to lithium-ion batteries. The development of new low-cost, non-toxic, highly performing electrode materials is the key point for the SIB technology advances. This study develops a basic life cycle assessment (LCA) model for the evaluation of the production by electrospinni…	Malara, Angela/0000-0001-8771-8485; Ruffo, Riccardo/0000-0001-7509-7052		10.1007/s10668-020-00891-y
Fahimi, A; Zanoletti, A; Federici, S; Assi, A; Bilo, F; Depero, LE; Bontempi, E	New Eco-Materials Derived from Waste for Emerging Pollutants Adsorption: The Case of Diclofenac	MATERIALS	This work proposes new eco-materials for the adsorption of diclofenac (DCF). The large consumption of this nonsteroidal anti-inflammatory drug combined with the inefficiency of wastewater treatment plants (WWTPs) leads to its presence in aquatic environments as an emerging pollutant. The adsorption technique is widely used for pharmaceutical removal. Moreover, due to the large effect of commercia…	Bontempi, Elza/0000-0003-1656-7506; FEDERICI, Stefania/0000-0001-7118-8766; Zanoletti, Alessandra/0000-0003-0225-7048; FAHIMI, Ario/0000-0002-0974-313X; Assi, Ahmad/0000-0002-4742-2038	2020	10.3390/ma13183964
Malucelli, G	Flame-Retardant Systems Based on Chitosan and Its Derivatives: State of the Art and Perspectives	MOLECULES	During the last decade, the utilization of chitin, and in par0ticular its deacetylated form, i.e., chitosan, for flame retardant purposes, has represented quite a novel and interesting application, very far from the established uses of this bio-sourced material. In this context, chitosan is a carbon source that can be successfully exploited, often in combination with intumescent products, in orde…	Malucelli, Giulio/0000-0002-0459-7698	2020	10.3390/molecules25184046
Assi, A; Bilo, F; Zanoletti, A; Borgese, L; Depero, LE; Nenci, M; Bontempi, E	Stabilization of Municipal Solid Waste Fly Ash, Obtained by Co-Combustion with Sewage Sludge, Mixed with Bottom Ash Derived by the Same Plant	APPLIED SCIENCES-BASEL	This study presents an innovative stabilization method of fly ash derived from co-combustion of municipal solid waste and sewage sludge. Bottom ash, obtained from the same process, is used as a stabilizing agent. The stabilization method involved the use of two other components-flue gas desulfurization residues and coal fly ash. Leaching tests were performed on stabilized samples, aged in a labor…	Assi, Ahmad/0000-0002-4742-2038; Zanoletti, Alessandra/0000-0003-0225-7048; Bilo, Fabjola/0000-0001-7362-3258; Bontempi, Elza/0000-0003-1656-7506; borgese, laura/0000-0003-3486-2656; Depero, Laura Eleonora/0000-0001-7818-3212	2020	10.3390/app10176075
Bonaccorsi, L; Fotia, A; Malara, A; Frontera, P	Advanced Adsorbent Materials for Waste Energy Recovery	ENERGIES	Nowadays, waste thermal energy represents a huge quantity of energy that, in most cases, is unfortunately dispersed rather than recovered. Although it is well known that its recovery could result in a considerable impact reduction of human activities on the environment, it is still a challenging issue. In view of this, absorption chillers and heat pumps, based on the use of porous materials capab…	Malara, Angela/0000-0001-8771-8485; Frontera, Patrizia/0000-0001-8045-9943	2020	10.3390/en13174299
Coppola, B; Palmero, P; Montanaro, L; Tulliani, JM	Alkali-activation of marble sludge: Influence of curing conditions and waste glass addition	JOURNAL OF THE EUROPEAN CERAMIC SOCIETY	The use of marble sludge as precursor for new alkali activated materials was assessed studying three different curing conditions (air, humid and water immersion, respectively), after an initial curing at 60 degrees C for 24 h, and two glass powder fractions additions (2.5 and 5.0 vol%). Microstructural, physical (drying shrinkage, Fourier transform-infrared (FT-IR) spectroscopy, X-ray spectroscop…	Tulliani, Jean-Marc/0000-0003-2419-4383; Coppola, Bartolomeo/0000-0003-2167-2132	2020	10.1016/j.jeurceramsoc.2019.11.068
Tummino, ML; Tolardo, V; Malandrino, M; Sadraei, R; Magnacca, G; Laurenti, E	A Way to Close the Loop: Physicochemical and Adsorbing Properties of Soybean Hulls Recovered After Soybean Peroxidase Extraction	FRONTIERS IN CHEMISTRY	Soybean hulls are one of the by-products of soybean crushing and find application mainly in the animal feed sector. Nevertheless, soybean hulls have been already exploited as source of peroxidase (soybean peroxidase, SBP), an enzyme adopted in a wide range of applications such as bioremediation and wastewater treatment, biocatalysis, diagnostic tests, therapeutics and biosensors. In this work, th…	Tummino, Maria Laura/0000-0002-1869-2602	2020	10.3389/fchem.2020.00763
Valentini, F; Morandini, F; Bergamo, M; Dorigato, A	Development of eco-sustainable plasters with thermal energy storage capability	JOURNAL OF APPLIED PHYSICS	In order to limit the energy demand of buildings, a possible strategy consists in the storage of thermal energy using phase change materials (PCMs). In this work, an innovative PCM-enhanced plaster, fully formulated by using materials coming from natural resources, was developed. The PCM (i.e., a biodegradable material from agricultural resources having a melting temperature of 23 degrees C) was …	Valentini, Francesco/0000-0001-9496-0501	2020	10.1063/5.0012139
Sanzone, A; Calascibetta, A; Monti, M; Mattiello, S; Sassi, M; Corsini, F; Griffini, G; Sommer, M; Beverina, L	Synthesis of Conjugated Polymers by Sustainable Suzuki Polycondensation in Water and under Aerobic Conditions	ACS MACRO LETTERS	Conjugated semiconducting polymers are key materials enabling plastic (opto)electronic devices. Research in the field has a generally strong focus on the constant improvement of backbone structure and the resulting properties. Comparatively fewer studies are devoted to improving the sustainability of the synthetic route that leads to a material under scrutiny. Exemplified by the two established a…	Griffini, Gianmarco/0000-0002-9924-1722; MATTIELLO, SARA/0000-0002-2907-0964	2020	10.1021/acsmacrolett.0c00495
Bagnato, G; Signoretto, M; Pizzolitto, C; Menegazzo, F; Xi, XY; ten Brink, GH; Kooi, BJ; Heeres, HJ; Sanna, A	Hydrogenation of Biobased Aldehydes to Monoalcohols Using Bimetallic Catalysts	ACS SUSTAINABLE CHEMISTRY & ENGINEERING	A series of monometallic and bimetallic metal catalysts (Pd, Cu, Fe, PdCu, PdFe) supported on ZrO2 (6-8 nm) were synthesized and tested for the hydrogenation of bio-oil model compounds (furfural, vanillin, glucose) under 50 bar H-2 at 100 degrees C. The catalysts were fully characterized and their properties related to their catalytic activity. The bimetallic PdFe and PdCu displayed enhanced cata…	Heeres, Hero Jan/0000-0002-1249-543X; Bagnato, Giuseppe/0000-0002-6576-9625; Kooi, Bart J./0000-0002-0311-4105; ten Brink, Gert/0000-0002-7807-8831; Menegazzo, Federica/0000-0001-8023-6379	2020	10.1021/acssuschemeng.0c02623
Rosso, C; Filippini, G; Prato, M	Carbon Dots as Nano-Organocatalysts for Synthetic Applications	ACS CATALYSIS	Over the last decades, organic chemistry has taken a resolute step toward green catalytic synthesis. This tries to ensure efficient and sustainable base chemical production, while also safeguarding human health and the environment. To this end, the development of novel, nontoxic, and effective catalytic systems that are capable of driving value-added chemical transformations in environmentally be…	Rosso, Cristian/0000-0002-1254-0528	2020	10.1021/acscatal.0c01989
Dorigato, A; Perin, D; Pegoretti, A	Effect of the Temperature and of the Drawing Conditions on the Fracture Behaviour of Thermoplastic Starch Films for Packaging Applications	JOURNAL OF POLYMERS AND THE ENVIRONMENT	In this work the effects of testing temperature and drawing orientation on the fracture behaviour of biobased and biodegradable thermoplastic starch based films, currently applied in the food packaging field, were investigated. At this aim, the Essential Work of Fracture (EWF) approach was applied on samples tested at 0 degrees C, 25 degrees C and 50 degrees C both in machine (MD) and in cross (C…	Perin, Davide/0000-0002-6248-2012	2020	10.1007/s10924-020-01843-3
Calascibetta, AM; Mattiello, S; Sanzone, A; Facchinetti, I; Sassi, M; Beverina, L	Sustainable Access to pi-Conjugated Molecular Materials via Direct (Hetero)Arylation Reactions in Water and under Air	MOLECULES	Direct (hetero)arylation (DHA) is playing a key role in improving the efficiency and atom economy of C-C cross coupling reactions, so has impacts in pharmaceutical and materials chemistry. Current research focuses on further improving the generality, efficiency and selectivity of the method through careful tuning of the reaction conditions and the catalytic system. Comparatively fewer studies are…		2020	10.3390/molecules25163717
Siracusa, V; Blanco, I	Bio-Polyethylene (Bio-PE), Bio-Polypropylene (Bio-PP) and Bio-Poly(ethylene terephthalate) (Bio-PET): Recent Developments in Bio-Based Polymers Analogous to Petroleum-Derived Ones for Packaging and Engineering Applications	POLYMERS	In recent year, there has been increasing concern about the growing amount of plastic waste coming from daily life. Different kinds of synthetic plastics are currently used for an extensive range of needs, but in order to reduce the impact of petroleum-based plastics and material waste, considerable attention has been focused on green plastics. In this paper, we present a broad review on the adva…	Blanco, Ignazio/0000-0001-9252-9435; Siracusa, Valentina/0000-0001-9055-5082	2020	10.3390/polym12081641
Galliano, S; Bella, F; Bonomo, M; Viscardi, G; Gerbaldi, C; Boschloo, G; Barolo, C	Hydrogel Electrolytes Based on Xanthan Gum: Green Route towards Stable Dye-Sensitized Solar Cells	NANOMATERIALS	The investigation of innovative electrolytes based on nontoxic and nonflammable solvents is an up-to-date, intriguing challenge to push forward the environmental sustainability of dye-sensitized solar cells (DSSCs). Water is one of the best choices, thus 100% aqueous electrolytes are proposed in this work, which are gelled with xanthan gum. This well-known biosourced polymer matrix is able to for…	Bonomo, Matteo/0000-0002-1944-2664; Barolo, Claudia/0000-0003-0627-2579; Boschloo, Gerrit/0000-0002-8249-1469; Bella, Federico/0000-0002-2282-9667	2020	10.3390/nano10081585
Modafferi, V; Triolo, C; Fiore, M; Palella, A; Spadaro, L; Pianta, N; Ruffo, R; Patane, S; Santangelo, S; Musolino, MG	Effect of Hematite Doping with Aliovalent Impurities on the Electrochemical Performance of alpha-Fe2O3@rGO-Based Anodes in Sodium-Ion Batteries	NANOMATERIALS	The effect of the type of dopant (titanium and manganese) and of the reduced graphene oxide content (rGO, 30 or 50 wt %) of the alpha-Fe2O3@rGO nanocomposites on their microstructural properties and electrochemical performance was investigated. Nanostructured composites were synthesized by a simple one-step solvothermal method and evaluated as anode materials for sodium ion batteries. The doping …	Palella, Alessandra/0000-0003-2400-2919; Ruffo, Riccardo/0000-0001-7509-7052; Santangelo, Saveria/0000-0003-1732-248X; Patane, Salvatore/0000-0003-2517-0236; Triolo, Claudia/0000-0001-9263-7786	2020	10.3390/nano10081588
Valente, M; Sambucci, M; Sibai, A; Musacchi, E	Multi-Physics Analysis for Rubber-Cement Applications in Building and Architectural Fields: A Preliminary Analysis	SUSTAINABILITY	Generally, in most countries, there are no strict regulations regarding tire disposal. Hence, tires end up thrown in seas and lands as well as being burnt, harming the living beings, and are therefore considered a very dangerous pollution source for the environment. Over the past few years, several researchers have worked on incorporating shredded/powdered rubber tires into cement-based material.…	Valente, Marco/0000-0002-6298-3693	2020	10.3390/su12155993
Hernandez-Rentero, C; Marangon, V; Olivares-Marin, M; Gomez-Serrano, V; Caballero, A; Morales, J; Hassoun, J	Alternative lithium-ion battery using biomass-derived carbons as environmentally sustainable anode	JOURNAL OF COLLOID AND INTERFACE SCIENCE	Disordered carbons derived from biomass are herein efficiently used as an alternative anode in lithiumion battery. Carbon precursor obtained from cherry pit is activated by using either KOH or H3PO4, to increase the specific surface area and enable porosity. Structure, morphology and chemical characteristics of the activated carbons are investigated by X-ray diffraction (XRD), transmission electr…	Caballero, Alvaro/0000-0002-2084-0686; Olivares-Marin, Mara/0000-0002-9797-7904; Hassoun, Jusef/0000-0002-8218-5680	2020	10.1016/j.jcis.2020.03.092
Pizzolitto, C; Menegazzo, F; Ghedini, E; Innocenti, G; Di Michele, A; Mattarelli, M; Cruciani, G; Cavani, F; Signoretto, M	Ethanol Steam Reforming on Lanthanum Ni-ZrO2 Catalysts	ACS SUSTAINABLE CHEMISTRY & ENGINEERING	Hydrogen is defined the future energy carrier, and ethanol steam reforming can be a sustainable process for its production. Promoting the addition of lanthanum on a Ni-zirconia catalyst was evaluated, with a focus on the lanthanum introduction method (incipient wetness impregnation and coprecipitation). The lanthanum addition strongly affected the morphological, structural, and chemical features …	Innocenti, Giada/0000-0003-2951-5457; Mattarelli, Maurizio/0000-0001-9184-7968; Di Michele, Alessandro/0000-0002-0357-2608; CAVANI, FABRIZIO/0000-0002-4282-6260; Menegazzo, Federica/0000-0001-8023-6379	2020	10.1021/acssuschemeng.0c02373
Sassi, M; Mattiello, S; Beverina, L	Syntheses of Organic Semiconductors in Water. Recent Advancement in the Surfactants Enhanced Green Access to Polyconjugated Molecules	EUROPEAN JOURNAL OF ORGANIC CHEMISTRY	Organic semiconductors have been at the center of intense investigation for decades. The efficiencies of the most performing candidates, along with the compatibility with solution processing and printing led to relevant technological breakthrough. The development of market applications for Organic Light Emitting Devices (OLEDs), Organic Thin film transistors (OTFTs), and Organic Photovoltaics (OP…	MATTIELLO, SARA/0000-0002-2907-0964	2020	10.1002/ejoc.202000140
Jakob, L; Michal, S; Franz-Georg, S; Margarida, Q; Jiri, H; Florian, H; Valerio, F; Johann, F; Roberto, B; Elza, B; Anna, B; Dominik, B	What waste management can learn from the traditional mining sector: Towards an integrated assessment and reporting of anthropogenic resources	WASTE MANAGEMENT	Many organizations in Europe collect data and perform research on municipal solid waste and the secondary raw materials that can be produced from them through recycling, urban mining, or landfill mining. However, the information generated and presented thereby is often highly aggregated, while research activities are many a time isolated. Both reduce the usability of the data and information gene…	Simon, Franz-Georg/0000-0002-4512-2031; Bontempi, Elza/0000-0003-1656-7506; Quina, Margarida J/0000-0002-9651-2427; Braga, Roberto/0000-0001-8210-6658; Funari, Valerio/0000-0002-8280-8518; Syc, Michal/0000-0002-3323-9638	2020	10.1016/j.wasman.2020.05.054
Coppola, L; Coffetti, D; Crotti, E; Candamano, S; Crea, F; Gazzaniga, G; Pastore, T	The combined use of admixtures for shrinkage reduction in one-part alkali activated slag-based mortars and pastes	CONSTRUCTION AND BUILDING MATERIALS	Binders obtained by alkaline activation of ground granulated blast furnace slag (GGBFS) represent an interesting alternative to Portland cement to manufacture sustainable mortars and concretes. However, several issues prevent them to have a ready and wide marketplace, such as high-magnitude shrinkage and lack of knowledge about advanced admixtures to control and regulate their properties and desi…	Coffetti, Denny/0000-0003-1217-4983; COPPOLA, Luigi/0000-0002-6825-3528	2020	10.1016/j.conbuildmat.2020.118682
Reichert, CL; Bugnicourt, E; Coltelli, MB; Cinelli, P; Lazzeri, A; Canesi, I; Braca, F; Martinez, BM; Alonso, R; Agostinis, L; Verstichel, S; Six, L; De Mets, S; Gomez, EC; Issbrucker, C; Geerinck, R; Nettleton, DF; Campos, I; Sauter, E; Pieczyk, P; Schmid, M	Bio-Based Packaging: Materials, Modifications, Industrial Applications and Sustainability	POLYMERS	Environmental impacts and consumer concerns have necessitated the study of bio-based materials as alternatives to petrochemicals for packaging applications. The purpose of this review is to summarize synthetic and non-synthetic materials feasible for packaging and textile applications, routes of upscaling, (industrial) applications, evaluation of sustainability, and end-of-life options. The outli…	Reichert, Corina/0000-0003-1080-9818; Lazzeri, Andrea/0000-0002-9463-1502; Alonso, Rafael/0000-0001-8249-4582	2020	10.3390/polym12071558
Coltelli, MB; Aliotta, L; Gigante, V; Bellusci, M; Cinelli, P; Bugnicourt, E; Schmid, M; Staebler, A; Lazzeri, A	Preparation and Compatibilization of PBS/Whey Protein Isolate Based Blends	MOLECULES	In this paper the production of biopolymeric blends of poly(butylene succinate) PBS and plasticized whey protein (PWP), obtained from a natural by-product from cheese manufacturing, has been investigated for the production of films and/or sheets. In order to add the highest possible whey protein content, different formulations (from 30 to 50 wt.%) were studied. It was found that by increasing the…	COLTELLI, MARIA BEATRICE/0000-0002-0418-8974; Stabler, Andreas/0000-0003-0982-974X; Gigante, Vito/0000-0003-3896-9629; /0000-0003-1876-5995; Lazzeri, Andrea/0000-0002-9463-1502; Cinelli, Patrizia/0000-0003-2401-133X	2020	10.3390/molecules25143313
Roviello, G; Ricciotti, L; Molino, AJ; Menna, C; Ferone, C; Asprone, D; Cioffi, R; Ferrandiz-Mas, V; Russo, P; Tarallo, O	Hybrid Fly Ash-Based Geopolymeric Foams: Microstructural, Thermal and Mechanical Properties	MATERIALS	This research investigates the preparation and characterization of new organic-inorganic geopolymeric foams obtained by simultaneously reacting coal fly ash and an alkali silicate solution with polysiloxane oligomers. Foaming was realized in situ using Si(0)as a blowing agent. Samples with density ranging from 0.3 to 0.7 g/cm(3)that show good mechanical properties (with compressive strength up to…	Russo, Pietro/0000-0001-6123-815X; Molino, Antonio Jacopo/0000-0001-7959-7126; Ferone, Claudio/0000-0002-8660-3771; Tarallo, Oreste/0000-0001-5952-523X; Ferrandiz-Mas, Veronica/0000-0002-0827-0756	2020	10.3390/ma13132919
Mobili, A; Telesca, A; Marroccoli, M; Tittarelli, F	Calcium sulfoaluminate and alkali-activated fly ash cements as alternative to Portland cement: study on chemical, physical-mechanical, and durability properties of mortars with the same strength class	CONSTRUCTION AND BUILDING MATERIALS	There is an increasing interest towards the development of alternative binders for the manufacture of sustainable mortars and concretes. Ordinary Portland cement (OPC) is the most commonly used material in construction, even if its production process is highly polluting. Both calcium sulfoaluminate (CSA) and alkali-activated cements (AAC) are potential alternative binders to be used in both struc…	Mobili, Alessandra/0000-0002-0891-5649; Tittarelli, Francesca/0000-0001-5805-6822	2020	10.1016/j.conbuildmat.2020.118436
Fahimi, A; Bilo, F; Assi, A; Dalipi, R; Federici, S; Guedes, A; Valentim, B; Olgun, H; Ye, GZ; Bialecka, B; Fiameni, L; Borgese, L; Cathelineau, M; Boiron, MC; Predeanu, G; Bontempi, E	Poultry litter ash characterisation and recovery	WASTE MANAGEMENT		Valentim, Bruno/0000-0002-1463-9126; Guedes, Alexandra/0000-0001-6397-3713; FAHIMI, Ario/0000-0002-0974-313X; Bilo, Fabjola/0000-0001-7362-3258	2020	10.1016/j.wasman.2020.05.010
Piperopoulos, E; Calabrese, L; Mastronardo, E; Proverbio, E; Milone, C	Sustainable Reuse of Char Waste for Oil Spill Recovery Foams	WATER AIR AND SOIL POLLUTION	The aim of this work is the employment of char waste in the synthesis of silicon foams for oil spill remediation and the comparison analysis with carbon nanotubes-filled foams. The foams are obtained by foaming a slurry constituted by a silicone matrix with CNT or char filler (7.7 wt%) in presence of a Sn-based catalyst. All the investigated materials present a foam morphology with an open/closed…	PIPEROPOULOS, Elpida/0000-0001-7960-4234	2020	10.1007/s11270-020-04671-2
Baldassarre, F; Tatulli, G; Vergaro, V; Mariano, S; Scala, V; Nobile, C; Pucci, N; Dini, L; Loreti, S; Ciccarella, G	Sonication-Assisted Production of Fosetyl-Al Nanocrystals: Investigation of Human Toxicity and In Vitro Antibacterial Efficacy againstXylella fastidiosa	NANOMATERIALS	Recently, there is a growing demand in sustainable phytopathogens control research. Nanotechnology provides several tools such as new pesticides formulations, antibacterial nanomaterials and smart delivery systems. Metal nano-oxides and different biopolymers have been exploited in order to develop nanopesticides which can offer a targeted solution minimizing side effects on environment and human …	Loreti, Stefania/0000-0001-7761-6186; Ciccarella, Giuseppe/0000-0003-4467-0922; Baldassarre, Francesca/0000-0002-3328-7701; Tatulli, Giuseppe/0000-0001-6257-1624; Vergaro, Viviana/0000-0003-3706-6276	2020	10.3390/nano10061174
Blanco, I; Ingrao, C; Siracusa, V	Life-Cycle Assessment in the Polymeric Sector: A Comprehensive Review of Application Experiences on the Italian Scale	POLYMERS	In recent years, a growing media campaign has demonized the use of plastic tout court, as solely responsible for environmental problems. Behind what is now vulgarly called plastic there are actually many applications and uses without which our daily life would be greatly penalized in the most common and routine actions. Our belief, in the role of researchers who have made polymers and their deriv…	Blanco, Ignazio/0000-0001-9252-9435; Siracusa, Valentina/0000-0001-9055-5082; Ingrao, Carlo/0000-0002-3359-2458	2020	10.3390/polym12061212
De Marchi, L; Rocha, RJM; Rodrigues, ACM; Soares, AMVM; Pretti, C; Chiellini, F; Freitas, R	Environmental Fate of Multistressors on Carpet Shell ClamRuditapes decussatus: Carbon Nanoparticles and Temperature Variation	SUSTAINABILITY	Ruditapes decussatusis a native clam from the Southern Europe and Mediterranean area, relevant to the development of sustainable aquaculture in these regions. As sessile organisms, bivalves are likely to be exposed to chemical contaminations and environmental changes in the aquatic compartment and are widely used as bioindicator species. Carbon-based nanomaterials (CNTs) use is increasing and, co…	Rodrigues, Andreia C. M./0000-0001-9839-6290; Pretti, Carlo/0000-0003-4949-2088; Soares, Amadeu/0000-0003-0879-9470; Chiellini, Federica/0000-0003-4680-9975; De Marchi, Lucia/0000-0001-6899-4476; Freitas, Rosa/0000-0003-4900-3897	2020	10.3390/su12124939
Cabrini, M; Lorenzi, S; Coffetti, D; Coppola, L; Pastore, T	Inhibition Effect of Tartrate Ions on the Localized Corrosion of Steel in Pore Solution at Different Chloride Concentrations	BUILDINGS	The aim of this work is the evaluation of the inhibition effect of tartrate ions with respect to the localized corrosion of steel reinforcements in alkaline solution as a function of the concentration of chlorides ions. Weight loss tests and electrochemical tests were carried out in saturated Ca(OH)(2) solution with NaOH at pH 12.7 and 13.2. The results only evidence a slight inhibition effect at…	COPPOLA, Luigi/0000-0002-6825-3528; Pastore, Tommaso/0000-0002-1443-7786; Coffetti, Denny/0000-0003-1217-4983; Lorenzi, Sergio/0000-0002-1337-7590	2020	10.3390/buildings10060105
Coltelli, MB; Panariello, L; Morganti, P; Danti, S; Baroni, A; Lazzeri, A; Fusco, A; Donnarumma, G	Skin-Compatible Biobased Beauty Masks Prepared by Extrusion	JOURNAL OF FUNCTIONAL BIOMATERIALS	In the cosmetic sector, natural and sustainable products with a high compatibility with skin, thus conjugating wellness with a green-oriented consumerism, are required by the market. Poly(hydroxyalkanoate) (PHA)/starch blends represent a promising alternative to prepare flexible films as support for innovative beauty masks, wearable after wetting and releasing starch and other selected molecules.…	Danti, Serena/0000-0002-8155-8537; Panariello, Luca/0000-0003-0172-6682; /0000-0002-3087-1240; Fusco, Alessandra/0000-0003-2641-1070; COLTELLI, MARIA BEATRICE/0000-0002-0418-8974; Lazzeri, Andrea/0000-0002-9463-1502	2020	10.3390/jfb11020023
Aliotta, L; Vannozzi, A; Panariello, L; Gigante, V; Coltelli, MB; Lazzeri, A	Sustainable Micro and Nano Additives for Controlling the Migration of a Biobased Plasticizer from PLA-Based Flexible Films	POLYMERS	Plasticized poly(lactic acid) (PLA)/poly(butylene succinate) (PBS) blend-based films containing chitin nanofibrils (CN) and calcium carbonate were prepared by extrusion and compression molding. On the basis of previous studies, processability was controlled by the use of a few percent of a commercial acrylic copolymer acting as melt strength enhancer and calcium carbonate. Furthermore, acetyl n-t…	/0000-0003-1876-5995; COLTELLI, MARIA BEATRICE/0000-0002-0418-8974; Panariello, Luca/0000-0003-0172-6682; Lazzeri, Andrea/0000-0002-9463-1502; Gigante, Vito/0000-0003-3896-9629	2020	10.3390/polym12061366
Marangon, V; Di Lecce, D; Orsatti, F; Brett, DJL; Shearing, PR; Hassoun, J	Investigating high-performance sulfur-metal nanocomposites for lithium batteries	SUSTAINABLE ENERGY & FUELS	Herein, for the first time, we study the reversible conversion in a lithium cell of a novel sulfur-metal nanocomposite by combining X-ray computed tomography data at the micro- and nanoscales with the electrochemistry. The electrode is obtained at mild temperatures according to an alternative approach, including metal nanoparticles of either tin or nickel in bulk molten sulfur in the correspondin…	DI LECCE, DANIELE/0000-0003-1290-1140; MARANGON, Vittorio/0000-0003-4722-8988; Hassoun, Jusef/0000-0002-8218-5680; Brett, Dan/0000-0002-8545-3126; Shearing, Paul/0000-0002-1387-9531	2020	10.1039/d0se00134a
Cavallaro, G; Milioto, S; Svetlana, K; Fakhrullina, G; Akhatova, F; Lazzara, G; Fakhrullin, R; Lvov, Y	Halloysite/Keratin Nanocomposite for Human Hair Photoprotection Coating	ACS APPLIED MATERIALS & INTERFACES	We propose a novel keratin treatment of human hair by its aqueous mixtures with natural halloysite clay nanotubes. The loaded clay nanotubes together with free keratin produce micrometer-thick protective coating on hair. First, colloidal and structural properties of halloysite/keratin dispersions and the nanotube loaded with this protein were investigated. Above the keratin isoelectric point (pH …	Lazzara, Giuseppe/0000-0003-1953-5817; Fakhrullin, Rawil/0000-0003-2015-7649; Akhatova, Farida Serikovna/0000-0002-8775-5267; , Giuseppe/0000-0002-2145-0161	2020	10.1021/acsami.0c05252
Kuhne, TD; Iannuzzi, M; Del Ben, M; Rybkin, VV; Seewald, P; Stein, F; Laino, T; Khaliullin, RZ; Schutt, O; Schiffmann, F; Golze, D; Wilhelm, J; Chulkov, S; Bani-Hashemian, MH; Weber, V; Borstnik, U; Taillefumier, M; Jakobovits, AS; Lazzaro, A; Pabst, H; Muller, T; Schade, R; Guidon, M; Andermatt, S; Holmberg, N; Schenter, GK; Hehn, A; Bussy, A; Belleflamme, F; Tabacchi, G; Gloss, A; Lass, M; Beth…	CP2K: An electronic structure and molecular dynamics software package - Quickstep: Efficient and accurate electronic structure calculations	JOURNAL OF CHEMICAL PHYSICS	CP2K is an open source electronic structure and molecular dynamics software package to perform atomistic simulations of solid-state, liquid, molecular, and biological systems. It is especially aimed at massively parallel and linear-scaling electronic structure methods and state-of-the-art ab initio molecular dynamics simulations. Excellent performance for electronic structure calculations is achi…	tabacchi, gloria/0000-0002-1988-6775; Rybkin, Vladimir/0000-0001-5136-6035; Hehn, Anna-Sophia/0000-0002-0498-740X; Bani-Hashemian, Mohammad Hossein/0000-0002-9436-2760; Golze, Dorothea/0000-0002-2196-9350	2020	10.1063/5.0007045
Naldoni, A; Kudyshev, ZA; Mascaretti, L; Sarmah, SP; Rej, S; Froning, JP; Tomanec, O; Yoo, JE; Wang, D; Kment, S; Montini, T; Fornasiero, P; Shalaev, VM; Schmuki, P; Boltasseva, A; Zboril, R	Solar Thermoplasmonic Nanofurnace for High-Temperature Heterogeneous Catalysis	NANO LETTERS	Most of existing solar thermal technologies require highly concentrated solar power to operate in the temperature range 300-600 degrees C. Here, thin films of refractory plasmonic TiN cylindrical nanocavities manufactured via flexible and scalable process are presented. The fabricated TiN films show polarization-insensitive 95% broadband absorption in the visible and near-infrared spectral ranges…	Schmuki, Patrik/0000-0002-9208-5771; Fornasiero, Paolo/0000-0003-1082-9157; Mascaretti, Luca/0000-0001-8997-7018; KMENT, Stepan/0000-0002-6381-5093; kudyshev, zhaxylyk/0000-0002-6955-0890; Naldoni, Alberto/0000-0001-5932-2125	2020	10.1021/acs.nanolett.0c00594
Carollo, G; Garbujo, A; Bedon, A; Ferri, D; Natile, MM; Glisenti, A	Cu/CGO cermet based electrodes for Symmetric and Reversible Solid Oxide Fuel Cells	INTERNATIONAL JOURNAL OF HYDROGEN ENERGY	Cu-based cermets suitable for electrodes in Symmetric and Reversible Solid Oxide Fuel Cells (SR-SOFCs) based on the Cerium Gadolinum Oxide (CGO) electrolyte were developed and successfully tested in the intermediate temperature range (600-800 degrees C). The Cu/CGO cermets were prepared by means of a self-combustion based citrate procedure and the effects of synthesis conditions were studied. Cha…	Glisenti, Antonella/0000-0003-4334-2150; Ferri, Davide/0000-0002-9354-5231; Carollo, Giovanni/0000-0002-6278-589X	2020	10.1016/j.ijhydene.2018.01.201
Ongaro, AE; Di Giuseppe, D; Kermanizadeh, A; Crespo, AM; Mencattini, A; Ghibelli, L; Mancini, V; Wlodarczyk, KL; Hand, DP; Martinelli, E; Stone, V; Howarth, N; La Carrubba, V; Pensabene, V; Kersaudy-Kerhoas, M	Polylactic is a Sustainable, Low Absorption, Low Autofluorescence Alternative to Other Plastics for Microfluidic and Organ-on-Chip Applications	ANALYTICAL CHEMISTRY	Organ-on-chip (OOC) devices are miniaturized devices replacing animal models in drug discovery and toxicology studies. The majority of OOC devices are made from polydimethylsiloxane (PDMS), an elastomer widely used in microfluidic prototyping, but posing a number of challenges to experimentalists, including leaching of uncured oligomers and uncontrolled absorption of small compounds. Here we asse…	Ongaro, Alfredo Edoardo/0000-0003-3084-6798; Ongaro, Alfredo Edoardo/0000-0003-3084-6798; La Carrubba, Vincenzo/0000-0002-3185-8398; Wlodarczyk, Krystian/0000-0003-3604-9538; Hand, Duncan/0000-0002-7699-4617	2020	10.1021/acs.analchem.0c00651
Foli, G; Esposti, MD; Morselli, D; Fabbri, P	Two-Step Solvent-Free Synthesis of Poly(hydroxybutyrate)-Based Photocurable Resin with Potential Application in Stereolithography	MACROMOLECULAR RAPID COMMUNICATIONS	A bio-based polymeric ink for stereolithography developed through a two-step solvent-free process is herein proposed. Specifically, low-molecular-weight poly(hydroxybutyrate) (PHB)-diol oligomers are prepared via molten transesterification of bacterial PHB with 1,4-butanediol. Transesterification conditions such as diol concentration, catalyst amount, and reaction time are studied for optimizing …	Morselli, Davide/0000-0003-3231-7769; Esposti, Micaela Degli/0000-0002-4513-8527; Fabbri, Paola/0000-0002-1903-8290	2020	10.1002/marc.201900660
Coppola, B; Tulliani, JM; Antonaci, P; Palmero, P	Role of Natural Stone Wastes and Minerals in the Alkali Activation Process: A Review	MATERIALS	This review aims to provide a comprehensive assessment concerning alkali activation of natural stone wastes and minerals. In particular, the structure of the review is divided into two main sections in which the works dealing with alumino-silicate and carbonatic stones are discussed, respectively. Alumino-silicate stones are generally composed of quartz and feldspars, while carbonatic stones are …	Tulliani, Jean-Marc/0000-0003-2419-4383; Coppola, Bartolomeo/0000-0003-2167-2132	2020	10.3390/ma13102284
Coppola, L; Coffetti, D; Crotti, E; Gazzaniga, G; Pastore, T	The Durability of One-Part Alkali-Activated Slag-Based Mortars in Different Environments	SUSTAINABILITY	The paper assesses the durability of one-part alkali-activated slag-based mortars (AAS) in different aggressive environments, such as calcium chloride- and magnesium sulphate-rich solutions, in comparison with traditional cementitious mortars at equal water to binder ratio. Moreover, the freezing and thawing resistance was evaluated on mortars manufactured with and without air entraining admixtur…	Coffetti, Denny/0000-0003-1217-4983; COPPOLA, Luigi/0000-0002-6825-3528; Pastore, Tommaso/0000-0002-1443-7786; Crotti, Elena/0000-0002-2991-7977	2020	10.3390/su12093561
Assi, A; Bilo, F; Zanoletti, A; Ponti, J; Valsesia, A; La Spina, R; Depero, LE; Bontempi, E	Review of the Reuse Possibilities Concerning Ash Residues from Thermal Process in a Medium-Sized Urban System in Northern Italy	SUSTAINABILITY	This review paper reports a detailed characterization of some combustion or incineration residues and by-products produced in a medium-sized city in Northern Italy. The municipal solid waste incineration (MSWI) generates fly ash, which is a toxic waste. Coal fly ash (CFA) and flue gas desulfurization (FGD) derive from the thermoelectric coal plant located in the same city. Along with these ashes,…	Zanoletti, Alessandra/0000-0003-0225-7048; Ponti, Jessica/0000-0002-4961-8405; Depero, Laura Eleonora/0000-0001-7818-3212; Bontempi, Elza/0000-0003-1656-7506	2020	10.3390/su12104193
Bonasera, A; Giuliano, G; Arrabito, G; Pignataro, B	Tackling Performance Challenges in Organic Photovoltaics: An Overview about Compatibilizers	MOLECULES	Organic Photovoltaics (OPVs) based on Bulk Heterojunction (BHJ) blends are a mature technology. Having started their intensive development two decades ago, their low cost, processability and flexibility rapidly funneled the interest of the scientific community, searching for new solutions to expand solar photovoltaics market and promote sustainable development. However, their robust implementatio…	Arrabito, Giuseppe/0000-0001-5890-5943; Bonasera, Aurelio/0000-0003-3275-6809; Giuliano, Giuliana/0000-0001-9240-3699	2020	10.3390/molecules25092200
Vassalini, I; Gjipalaj, J; Crespi, S; Gianoncelli, A; Mella, M; Ferroni, M; Alessandri, I	Alginate-Derived Active Blend Enhances Adsorption and Photocatalytic Removal of Organic Pollutants in Water	ADVANCED SUSTAINABLE SYSTEMS	The ever-increasing need for clean water is one of the most urgent sustainable development goals, which requires environmentally-friendly strategies for water remediation against different types of pollutants. In this work, the possibility of using alginate, a biocompatible and natural polysaccharide, is explored for the preparation of both oxide (TiO2, Al2O3, and yttria-stabilized ZrO2 (YSZ)) ma…	Crespi, Stefano/0000-0002-0279-4903; Alessandri, Ivano/0000-0003-0332-0723; Vassalini, Irene/0000-0002-5500-9999	2020	10.1002/adsu.201900112
Quartarone, E; Eisenmann, T; Kuenzel, M; Tealdi, C; Marrani, AG; Brutti, S; Callegari, D; Passerini, S	Towards Advanced Sodium-Ion Batteries: Green, Low-Cost and High-Capacity Anode Compartment Encompassing Phosphorus/Carbon Nanocomposite as the Active Material and Aluminum as the Current Collector	JOURNAL OF THE ELECTROCHEMICAL SOCIETY	Sodium-ion batteries (SIBs) are promising alternative to Lithium-ion batteries for massive stationary energy storage. To improve energy density, however, more performing active materials are needed. In order to allow sustainable scale-up, it is also mandatory to develop green products and processes. Herein, we report on anodes of phosphorus/carbon (P/C) nanocomposites prepared via High Energy Bal…	Marrani, Andrea/0000-0002-3203-9642; quartarone, eliana/0000-0002-1192-7747; Brutti, Sergio/0000-0001-8853-9710	2020	10.1149/1945-7111/ab856e
Fantauzzi, M; Elsener, B; Cocco, F; Passiu, C; Rossi, A	Model Protective Films on Cu-Zn Alloys Simulating the Inner Surfaces of Historical Brass Wind Instruments by EIS and XPS	FRONTIERS IN CHEMISTRY	The present work focuses on the characterization of brass surfaces after contact with artificial saliva solution at pH 7.4 and phosphate buffer solution at pH 7 simulating two extreme conditions that might occur when playing ancient brass wind instruments in the context of historically informed performance practice. The composition and the morphology of the film formed following the contact with …	Fantauzzi, Marzia/0000-0003-2648-2215	2020	10.3389/fchem.2020.00272
Dengo, N; Vittadini, A; Natile, MM; Gross, S	In-Depth Study of ZnS Nanoparticle Surface Properties with a Combined Experimental and Theoretical Approach	JOURNAL OF PHYSICAL CHEMISTRY C	ZnS nanoparticles (NPs) were synthesized using a simple, green, and reproducible hydrothermal method. Transmission electron micrographs show polyhedral NPs having an average diameter of 21 nm; whereas the X-ray diffraction analysis is consistent with the exclusive presence of cubic ZnS; however no oxide could be detected. A comprehensive characterization of the NPs' surface was accomplished throu…	Gross, Silvia/0000-0003-1860-8711; Vittadini, Andrea/0000-0003-3733-9166	2020	10.1021/acs.jpcc.9b11323
Bassini, E; Cattano, G; Marchese, G; Biamino, S; Ugues, D; Lombardi, M; Vallillo, G; Picque, B	Study of the Effects of Aging Treatment on Astroloy Processed via Hot Isostatic Pressing (vol 12, 1517, 2019)	MATERIALS		Lombardi, Mariangela/0000-0002-1546-8525; UGUES, Daniele/0000-0002-6543-5916; Bassini, Emilio/0000-0003-4751-4327; Biamino, Sara/0000-0003-1840-7717	2020	10.3390/ma13081831
Papanikolaou, G; Lanzafame, P; Giorgianni, G; Abate, S; Perathoner, S; Centi, G	Highly selective bifunctional Ni zeo-type catalysts for hydroprocessing of methyl palmitate to green diesel	CATALYSIS TODAY	Highly selective bifunctional micro-mesoporous Ni-Beta catalysts, with different accessibility of both redox and acidic sites, for the production of green diesel from algal oil, were synthesized by modifying the zeolite features by desilication or desilication/dealumination treatments and by introducing the Ni nanoparticles (NPs) inside the pore system or on the external surface. The textural and…	Centi, Gabriele/0000-0001-5626-9840; Giorgianni, Gianfranco/0000-0002-5305-7727; PAPANIKOLAOU, GEORGIA/0000-0001-6295-0106; Perathoner, Siglinda/0000-0001-8814-1972; LANZAFAME, PAOLA/0000-0002-6092-346X	2020	10.1016/j.cattod.2019.12.009
Rossetti, I; Tripodi, A; Ramis, G	Hydrogen, ethylene and power production from bioethanol: Ready for the renewable market?	INTERNATIONAL JOURNAL OF HYDROGEN ENERGY	The economic sustainability of renewable based sources is a matter of debate and the technology is changing very fast. We here considered three examples of exploitation of bioethanol as renewable source: a) centralised hydrogen prodution; b) heat and power cogeneration (residential scale); c) ethylene production. Bioethanol can be a suitable starting material for the production of H-2, as fuel or…		2020	10.1016/j.ijhydene.2019.07.201
Ricciotti, L; Occhicone, A; Petrillo, A; Ferone, C; Cioffi, R; Roviello, G	Geopolymer-based hybrid foams: Lightweight materials from a sustainable production process	JOURNAL OF CLEANER PRODUCTION	The construction industry causes significant environmental impacts in terms of global warming and embodied energy consumption. Concrete is one of the most widely used product in the planet. The development of new materials as alternative to cement could lay the foundations for introducing on the market innovative systems with higher performances and lower environmental impacts. The present resear…		2020	10.1016/j.jclepro.2019.119588
Omachi, H; Inoue, T; Hatao, S; Shinohara, H; Criado, A; Yoshikawa, H; Syrgiannis, Z; Prato, M	Concise, Single-Step Synthesis of Sulfur-Enriched Graphene: Immobilization of Molecular Clusters and Battery Applications	ANGEWANDTE CHEMIE-INTERNATIONAL EDITION	The concise synthesis of sulfur-enriched graphene for battery applications is reported. The direct treatment of graphene oxide (GO) with the commercially available Lawesson's reagent produced sulfur-enriched-reduced GO (S-rGO). Various techniques, such as X-ray photoelectron spectroscopy (XPS), confirmed the occurrence of both sulfur functionalization and GO reduction. Also fabricated was a nanoh…	Omachi, Haruka/0000-0001-8513-2982; Criado, Alejandro/0000-0002-9732-513X; Syrgiannis, Zois/0000-0003-0345-182X; Prato, Maurizio/0000-0002-8869-8612; Yoshikawa, Hirofumi/0000-0002-0088-1579	2020	10.1002/anie.201913578
Osw, P; Nitti, A; Abdullah, MN; Etkind, SI; Mwaura, J; Galbiati, A; Pasini, D	Synthesis and Evaluation of Scalable D-A-D pi-Extended Oligomers as p-Type Organic Materials for Bulk-Heterojunction Solar Cells	POLYMERS	The synthesis and characterization of four novel donor-acceptor-donor pi-extended oligomers, incorporating naphtha(1-b)thiophene-4-carboxylate or benzo(b)thieno(3,2-g) benzothiophene-4-carbo xylate 2-octyldodecyl esters as end-capping moieties, and two different conjugated core fragments, is reported. The end-capping moieties are obtained via a cascade sequence of sustainable organic reactions, a…	Pasini, Dario/0000-0002-8273-3798; Osw, Peshawa/0000-0002-0942-3187; Nitti, Andrea/0000-0002-7232-5707	2020	10.3390/polym12030720
Anglani, G; Tulliani, JM; Antonaci, P	Behaviour of Pre-Cracked Self-Healing Cementitious Materials under Static and Cyclic Loading	MATERIALS	Capsule-based self-healing is increasingly being targeted as an effective way to improve the durability and sustainability of concrete infrastructures through the extension of their service life. Assessing the mechanical and durability behaviour of self-healing materials after damage and subsequent autonomous repair is essential to validate their possible use in real structures. In this study, se…	Anglani, Giovanni/0000-0003-1656-6319; Tulliani, Jean-Marc/0000-0003-2419-4383	2020	10.3390/ma13051149
Baldassarre, F; De Stradis, A; Altamura, G; Vergaro, V; Citti, C; Cannazza, G; Capodilupo, AL; Dini, L; Ciccarella, G	Application of calcium carbonate nanocarriers for controlled release of phytodrugs against Xylella fastidiosa pathogen	PURE AND APPLIED CHEMISTRY	Calcium carbonate-based hollow or porous particles are one of the preferred carriers for fabrication of drug delivery systems. We have developed an eco-friendly method to produce calcium carbonate nanocrystals, which have shown biocompatibility and optimal capacity to across cell membrane in human cell lines providing new tools in cancer therapy. The success of drug delivery systems has paved the…	DE STRADIS, ANGELO/0000-0003-1624-2365; CANNAZZA, GIUSEPPE/0000-0002-7347-7315; Citti, Cinzia/0000-0002-9210-5074; Baldassarre, Francesca/0000-0002-3328-7701	2020	10.1515/pac-2018-1223
Morandi, S; Manzoli, M; Chan-Thaw, CE; Bonelli, B; Stucchi, M; Prati, L; Stormer, H; Wang, W; Wang, D; Pabel, M; Villa, A	Unraveling the effect of ZrO2 modifiers on the nature of active sites on AuRu/ZrO2 catalysts for furfural hydrogenation	SUSTAINABLE ENERGY & FUELS	Ru and AuRu nanoparticles were prepared by a sol-immobilization methodology and deposited on different doped zirconia supports (ZrO2, Y-ZrO2 and La-ZrO2). The catalysts were characterized by analytic transmission electron microscopy (TEM), Fourier transform infrared spectroscopy (FTIR) in a controlled atmosphere and X-ray photoelectron spectroscopy (XPS). TEM analysis showed that AuRu catalysts c…	Prati, Laura/0000-0002-8227-9505; Manzoli, Maela/0000-0002-4427-7939; STUCCHI, MARTA/0000-0003-0711-3684	2020	10.1039/c9se00847k
Tagliaro, I; Di Credico, B; Moncho-Jorda, A	Electrostatic depletion effects on the stability of colloidal dispersions of sepiolite and natural rubber latex	JOURNAL OF COLLOID AND INTERFACE SCIENCE	Biocomposites based on sepiolite (Sep) clays and natural rubber latex (NRL) are novel green synthetic materials with significant mechanical performance obtained by an eco-friendly and sustainable mixing procedure, without the use of surfactants. In this work, experiments and theory are combined to investigate the stability of colloidal dispersions formed by a mixture of both negatively charged Se…	Moncho-Jorda, Arturo/0000-0002-2001-2987	2020	10.1016/j.jcis.2019.10.083
Bella, F; Porcarelli, L; Mantione, D; Gerbaldi, C; Barolo, C; Gratzelf, M; Mecerreyes, D	A water-based and metal-free dye solar cell exceeding 7% efficiency using a cationic poly(3,4-ethylenedioxythiophene) derivative	CHEMICAL SCIENCE	A green, efficient and stable solar cell based only on water and safe and cheap elements of the periodic table is proposed in this work, finally consolidating (also from a sustainability viewpoint) the concept of artificial photosynthesis studied for decades by the scientific community. The concept of dye-sensitized solar cells is re-proposed here with a metal-free organic dye, an iodine-based el…	Mecerreyes, David/0000-0002-0788-7156; Bella, Federico/0000-0002-2282-9667; Barolo, Claudia/0000-0003-0627-2579; PORCARELLI, LUCA/0000-0002-1624-382X	2020	10.1039/c9sc05596g
Assi, A; Bilo, F; Zanoletti, A; Ducoli, S; Ramorino, G; Gobetti, A; Zacco, A; Federici, S; Depero, LE; Bontempi, E	A Circular Economy Virtuous Example-Use of a Stabilized Waste Material Instead of Calcite to Produce Sustainable Composites	APPLIED SCIENCES-BASEL	This work reports and analyzes the mechanical properties of some composites obtained using stabilized waste with epoxy resins E-227. For comparison, correspondent composite samples were realized using calcite as a filler. The recovered stabilized waste was obtained by means of a new method to stabilize municipal solid waste incineration (MSWI) fly ash (FA), based on the use of bottom ash (BA). Th…	FEDERICI, Stefania/0000-0001-7118-8766; Depero, Laura Eleonora/0000-0001-7818-3212; ZACCO, Annalisa/0000-0001-6572-8981; Bontempi, Elza/0000-0003-1656-7506; Gobetti, Anna/0000-0002-7305-6887; Zanoletti, Alessandra/0000-0003-0225-7048	2020	10.3390/app10030754
Barroso-Martin, I; Alberoni, C; Rodriguez-Castellon, E; Infantes-Molina, A; Moretti, E	Recent advances in photo-assisted preferential CO oxidation in H-2-rich stream	CURRENT OPINION IN GREEN AND SUSTAINABLE CHEMISTRY	Photocatalysis plays a key role in CO preferential oxidation (CO-PROX) in H-2-rich streams thanks to the great performance this reaction can achieve when it is light driven, at atmospheric pressure and room temperature, with negligible hydrogen loss. This short review is an attempt to summarize the most recent advances in photo-PROX focused mainly on the most popular strategies to improve TiO2 ph…		2020	10.1016/j.cogsc.2019.07.008
Kvande, K; Pappas, DK; Dyballa, M; Buono, C; Signorile, M; Borfecchia, E; Lomachenko, KA; Arstad, B; Bordiga, S; Berlier, G; Olsbye, U; Beato, P; Svelle, S	Comparing the Nature of Active Sites in Cu-loaded SAPO-34 and SSZ-13 for the Direct Conversion of Methane to Methanol	CATALYSTS	On our route towards a more sustainable future, the use of stranded and underutilized natural gas to produce chemicals would be a great aid in mitigating climate change, due to the reduced CO2 emissions in comparison to using petroleum. In this study, we investigate the performance of Cu-exchanged SSZ-13 and SAPO-34 microporous materials in the stepwise, direct conversion of methane to methanol. …	Svelle, Stian/0000-0002-7468-5546; Signorile, Matteo/0000-0003-0521-3702; Borfecchia, Elisa/0000-0001-8374-8329; Berlier, Gloria/0000-0001-7720-3584; Kvande, Karoline/0000-0002-0154-0346	2020	10.3390/catal10020191
Melchionna, M; Fornasiero, P; Prato, M	Into the carbon: A matter of core and shell in advanced electrocatalysis	APL MATERIALS	Electrocatalysis, particularly related to fuel cell applications or other processes related to sustainability, has been steadily advanced by the design of new hierarchical materials involving two or more phases. One particularly appealing type of structure features metal species confined within carbon layers. These materials combine the benefits of the two components, which often work in synergy.…	Fornasiero, Paolo/0000-0003-1082-9157; Melchionna, Michele/0000-0001-9813-9753; Prato, Maurizio/0000-0002-8869-8612	2020	10.1063/1.5134466
Blasenbauer, D; Huber, F; Lederer, J; Quina, MJ; Blanc-Biscarat, D; Bogush, A; Bontempi, E; Blondeau, J; Chimenos, JM; Dahlbo, H; Fagerqvist, J; Giro-Paloma, J; Hjelmar, O; Hyks, J; Keaney, J; Lupsea-Toader, M; O'Caollai, CJ; Orupold, K; Pajak, T; Simon, FG; Svecova, L; Syc, M; Ulvang, R; Vaajasaari, K; Van Caneghem, J; van Zomeren, A; Vasarevicius, S; Wegner, K; Fellner, J	Legal situation and current practice of waste incineration bottom ash utilisation in Europe	WASTE MANAGEMENT	Almost 500 municipal solid waste incineration plants in the EU, Norway and Switzerland generate about 17.6 Mt/a of incinerator bottom ash (IBA). IBA contains minerals and metals. Metals are mostly separated and sold to the scrap market and minerals are either disposed of in landfills or utilised in the construction sector. Since there is no uniform regulation for IBA utilisation at EU level, coun…	Svecova, Lenka/0000-0003-2439-2646; Syc, Michal/0000-0002-3323-9638; Giro-Paloma, Jessica/0000-0003-3226-9752; Vasarevicius, Saulius/0000-0003-3799-8647; Chimenos, Josep Maria/0000-0002-9625-1511; Van Caneghem, Jo/0000-0002-4052-1260; Simon, Franz-Georg/0000-0002-4512-2031; Pajak, Tadeusz/0000-0002-3244-1631; Quina, Margarida J/0000-0002-9651-2427; Huber, Florian/0000-0001-8274-9813; Dahlbo, Hele…	2020	10.1016/j.wasman.2019.11.031
Olivo, A; Thompson, WA; Bay, ERB; Ghedini, E; Menegazzo, F; Maroto-Valer, M; Signoretto, M	Investigation of process parameters assessment via design of experiments for CO2 photoreduction in two photoreactors	JOURNAL OF CO2 UTILIZATION	CO2 photoreduction with water to obtain solar fuels is one of the most innovative and sustainable processes to harvest light energy and convert it into hydrocarbons. Although photocatalytically active materials and photoreactors have been developed for this purpose, lack of standardisation in testing conditions makes the assessment of process parameters and the comparison of material performance …	Thompson, Warren/0000-0003-1474-7810; Maroto-Valer, Mercedes/0000-0003-1643-2863	2020	10.1016/j.jcou.2019.10.009
Zanoletti, A; Bilo, F; Federici, S; Borgese, L; Depero, LE; Ponti, J; Valsesia, A; La Spina, R; Segata, M; Montini, T; Bontempi, E	The first material made for air pollution control able to sequestrate fine and ultrafine air particulate matter	SUSTAINABLE CITIES AND SOCIETY	Air pollution accounts as a critical environmental issue in different populated cities. With the introduction of smart cities concept, suitable measures to reduce people exposition to pollutants must be part of the policies for a suitable urban development. Generally urban policy makers have proposed some restrictions (for example for traffic), that were resulted insufficient. Then probably, diff…	Zanoletti, Alessandra/0000-0003-0225-7048; MONTINI, Tiziano/0000-0001-9515-566X; Bontempi, Elza/0000-0003-1656-7506; Depero, Laura Eleonora/0000-0001-7818-3212; Ponti, Jessica/0000-0002-4961-8405	2020	10.1016/j.scs.2019.101961
Fabbri, L; Sun, YK; Piciollo, E; Salvietti, E; Zangari, G; Passaponti, M; Innocenti, M	Electrodeposition of White Bronzes on the Way to CZTS Absorber Films	JOURNAL OF THE ELECTROCHEMICAL SOCIETY	In order to substitute traditional cyanide-based baths and obtain a new eco-compatible route to synthesize via electrodeposition a CZTS (copper-zinc-tin sulfide) absorber films, this paper describes the development of a green electrodeposition bath for Cu-Sn alloys. CZTS, being a p-type semiconducting material could be used in novel and sustainable photovoltaic devices. In this work we analyzed t…	Innocenti, Massimo/0000-0003-1044-5583; Fabbri, Lorenzo/0000-0002-8626-1097; Sun, Yun-Kai/0000-0001-8044-4936	2020	10.1149/1945-7111/ab6c59
Bassini, E; Basile, G; Marchese, G; Lorusso, M; Lombardi, M; Picque, B; Biamino, S; Ugues, D	Assessment of the reinforcing system and carbides evolution in hot isostatically pressed astroloy after prolonged exposure at 820 degrees C	MATERIALS SCIENCE AND ENGINEERING A-STRUCTURAL MATERIALS PROPERTIES MICROSTRUCTURE AND PROCESSING	Hot Isostatic Pressing (HIP) is a powder metallurgy technique which densifies metallic powders via the contemporary application of high temperature and pressure. Such manufacturing route demonstrated highly efficient to produce components made of material with low forgeability or castability such as the Ni-based superalloys. Such materials are designed to withstand very high temperatures, which t…	Lombardi, Mariangela/0000-0002-1546-8525; Biamino, Sara/0000-0003-1840-7717; Lorusso, Massimo/0000-0002-9397-0676; UGUES, Daniele/0000-0002-6543-5916	2020	10.1016/j.msea.2019.138879
Puppi, D; Braccini, S; Ranaudo, A; Chiellini, F	Poly(3-hydroxybutyrate-co-3-hydroxyexanoate) scaffolds with tunable macro- and microstructural features by additive manufacturing	JOURNAL OF BIOTECHNOLOGY	Polymer microstructural engineering by additive manufacturing (AM) represents a powerful tool to functionalize tissue engineering scaffolds. This article reports on the processing of polymer/solvent/non-solvent ternary mixtures through their extrusion in a non-solvent bath as an innovative phase inversion-based AM approach to engineer poly(3-hydroxybutyrate-co-3-hydroxyexanoate) (PHBHHx) scaffold…	Chiellini, Federica/0000-0003-4680-9975; Puppi, Dario/0000-0002-9251-4388	2020	10.1016/j.jbiotec.2019.12.005
Di Lecce, D; Gancitano, V; Hassoun, J	Investigation of Mn and Fe Substitution Effects on the Characteristics of High-Voltage LiCo1-xMxPO4 (x=0.1, 0.4) Cathodes Prepared by Sol gel Route	ACS SUSTAINABLE CHEMISTRY & ENGINEERING	Herein, we provide a fundamental study revealing the substantial changes promoted by manganese and iron substitution for cobalt in a high-voltage LiCoPO4 olivine cathode. Therefore, LiCoPO4, LiCo0.9Fe0.1PO4, LiCo0.6Fe0.4PO4, Li-Co0.9Mn0.1PO4, and LiCo0.6Mn0.4PO4 are synthesized by a sol gel pathway and comparatively investigated in terms of structure, morphology, and electrochemical features in l…	DI LECCE, DANIELE/0000-0003-1290-1140; Hassoun, Jusef/0000-0002-8218-5680	2020	10.1021/acssuschemeng.9b05325
Karthik, PE; Alessandri, I; Sengeni, A	A Review on Electrodes Used in Electroorganic Synthesis and the Significance of Coupled Electrocatalytic Reactions	JOURNAL OF THE ELECTROCHEMICAL SOCIETY	Organic conversions electrified by suitable catalytic electrodes is attracting ever-increasing attention as it possesses multiple advantages such as minimal waste production, high atom economy, use of clean and green reagents, high selectivity and ability to provide shorter pathways for many important multi-step organic reactions. Electrochemically driven fluorination, polymerizations, C-H or C-X…	Sengeni, Anantharaj/0000-0002-3265-2455; Alessandri, Ivano/0000-0003-0332-0723	2020	10.1149/1945-7111/abb0f2
Di Gesu, R; Gualandi, C; Zucchelli, A; Liguori, A; Paltrinieri, L; Focarete, ML	Biodegradable electrospun fibers enriched with struvite crystal seeds for the recovery of phosphorous and nitrogen	EUROPEAN POLYMER JOURNAL	One of the greatest global challenges of the 21st century is facing the depletion of phosphorous reserves, widely used in fertilizers. One possibility is to recover the phosphorous discharged in the water by human activities, with the consequent additional benefit of improving water quality by limiting eutrophication. In this work, biodegradable poly(L-lactic acid) (PLLA) nonwovens produced by el…	Focarete, Maria Letizia/0000-0002-0458-7836; Di Geso, Roberto/0000-0001-6196-643X	2020	10.1016/j.eurpolymj.2019.109389
Yalavarthi, R; Henrotte, O; Minguzzi, A; Ghigna, P; Grave, DA; Naldoni, A	In situ characterizations of photoelectrochemical cells for solar fuels and chemicals	MRS ENERGY & SUSTAINABILITY	Environmental concerns deriving from fossil fuel dependency are driving an energy transition based on sustainable processes to make fuels and chemicals. Solar hydrogen is the pillar of this new green economy, but the technological readiness level of PV electrolysis and direct photoelectrochemical (PEC) electrolysis are still too low to allow broad commercialization. Direct conversion through PEC …	Yalavarthi, Rambabu/0000-0002-5131-2843; Minguzzi, Alessandro/0000-0002-8130-4465	2020	10.1557/mre.2020.37
Busatto, S; Zendrini, A; Radeghieri, A; Paolini, L; Romano, M; Presta, M; Bergese, P	The nanostructured secretome	BIOMATERIALS SCIENCE	The term secretome, which traditionally strictly refers to single proteins, should be expanded to also include the great variety of nanoparticles secreted by cells (secNPs) into the extracellular space, which ranges from high-density lipoproteins of a few nanometers to extracellular vesicles and fat globules of hundreds of nanometers. Widening the definition is urged by the ever-increasing unders…	BERGESE, Paolo/0000-0002-4652-2168; Zendrini, Andrea/0000-0002-3626-0360; Paolini, Lucia/0000-0002-4410-5272; PRESTA, Marco/0000-0002-4398-8376; Romano, Miriam/0000-0002-3972-460X; Busatto, Sara/0000-0002-9128-5579	2020	10.1039/c9bm01007f
Marepally, BC; Ampelli, C; Genovese, C; Tavella, F; Quadrelli, EA; Perathoner, S; Centi, G	Electrocatalytic reduction of CO2 over dendritic-type Cu- and Fe-based electrodes prepared by electrodeposition	JOURNAL OF CO2 UTILIZATION	The identification of the role of nano-morphology of electrodes for the reduction of CO2, particularly in determining the selectivity towards > C1 products of reduction, is still a challenge. We show here for the first time how a dendritic-type nano-morphology and related fractal dimension plays a crucial role in determining the selectivity for electrodes based on Cu and Fe. The electrodes, prepa…	GENOVESE, Chiara/0000-0002-4939-2442; Ampelli, Claudio/0000-0001-7048-976X; MAREPALLY, BHANU CHANDRA/0000-0001-5836-856X; Centi, Gabriele/0000-0001-5626-9840	2020	10.1016/j.jcou.2019.09.017
Fantino, E; Chiado, A; Quaglio, M; Vaghi, V; Cocuzza, M; Marasso, SL; Potrich, C; Lunelli, L; Pederzolli, C; Pirri, CF; Bongiovanni, R; Vitale, A	Photofabrication of polymeric biomicrofluidics: New insights into material selection	MATERIALS SCIENCE & ENGINEERING C-MATERIALS FOR BIOLOGICAL APPLICATIONS	We propose a versatile method to evaluate the suitability of polymers for the fabrication of microfluidic devices for biomedical applications, based on the concept that the selection and the design of convenient materials should involve different properties depending on the final microfluidic application. Here polymerase chain reaction (PCR) is selected as biological model and target microfluidic…	Potrich, Cristina/0000-0002-0793-7547; Marasso, Simone Luigi/0000-0003-4570-2674; Vitale, Alessandra/0000-0002-8682-3125; Quaglio, Marzia/0000-0003-3707-8760; bongiovanni, roberta/0000-0002-2607-9461	2020	10.1016/j.msec.2019.110166
Cappucci, GM; Pini, M; Neri, P; Marassi, M; Bassoli, E; Ferrari, AM	Environmental sustainability of orthopedic devices produced with powder bed fusion	JOURNAL OF INDUSTRIAL ECOLOGY	Additive manufacturing consists in melting metallic powders to produce objects from 3D data, layer upon layer. Its industrial applications range from automotive, biomedical (e.g., prosthetic implants for dentistry and orthopedics), aeronautics and others. This study uses life cycle assessment to evaluate the possible improvement in environmental performance of laser-based powder bed fusion additi…		2020	10.1111/jiec.12968
Roviello, G; Chianese, E; Ferone, C; Ricciotti, L; Roviello, V; Cioffi, R; Tarallo, O	Hybrid Geopolymeric Foams for the Removal of Metallic Ions from Aqueous Waste Solutions	MATERIALS	For the first time, hybrid organic-inorganic geopolymeric foams were successfully used as monolithic adsorbents for the removal of metallic ions pollutants from wastewaters. The foams were realized by the in situ foaming of a hybrid geopolymer obtained by a reaction of metakaolin and polysiloxane oligomers under strong alkaline conditions and then cured at room temperature. In this way, porous ma…	Tarallo, Oreste/0000-0001-5952-523X; Roviello, Valentina/0000-0001-7340-8101; Ferone, Claudio/0000-0002-8660-3771	2019	10.3390/ma12244091
Sergi, C; Tirillo, J; Sarasini, F; Pozuelo, EB; Saez, SS; Burgstaller, C	The Potential of Agglomerated Cork for Sandwich Structures: A Systematic Investigation of Physical, Thermal, and Mechanical Properties	POLYMERS	Considering the major role played by sandwich structures in many fields where high stiffness-to-weight ratio is required, the selection of a suitable core material is of paramount importance. In order to face the environmental problems related to waste disposal, the selection of an eco-friendly core material is now included in the design criteria of sandwich structures. Agglomerated cork is recog…	SANCHEZ, SONIA/0000-0002-6021-4284; BARBERO, ENRIQUE/0000-0001-5065-4887	2019	10.3390/polym11122118
Ghedini, E; Menegazzo, F; Manzoli, M; Di Michele, A; Puglia, D; Signoretto, M	Multifunctional and Environmentally Friendly TiO2-SiO2 Mesoporous Materials for Sustainable Green Buildings	MOLECULES	This work deals with the formulation of environmentally friendly, cheap, and readily-available materials for green building applications, providing the function of air purificator by improving the safety and the comfort of an indoor environment. High surface area TiO2-SiO2 samples, prepared by a simple, cost effective, and scalable synthetic approach, proved to be effective in maximizing the prop…	Puglia, Debora/0000-0001-8515-7813	2019	10.3390/molecules24234226
Zheng, M; Lamberti, F; Franco, L; Collini, E; Fortunati, I; Bottaro, G; Daniel, G; Sorrentino, R; Minotto, A; Kukovecz, A; Menna, E; Silvestrini, S; Durante, C; Cacialli, F; Meneghesso, G; Maggini, M; Gatti, T	A film-forming graphene/diketopyrrolopyrrole covalent hybrid with far-red optical features: Evidence of photo-stability	SYNTHETIC METALS	A dianiline derivative of a symmetric donor-acceptor-donor diketopyrrolopyrrole-based dye is employed for the two-sided covalent functionalization of liquid exfoliated few layers graphene flakes, through a direct arylation reaction. The resulting nanohybrid features the properties of a polymeric species, being solution-processed into homogeneous thin films, featuring a pronounced red-shift of the…	Menna, Enzo/0000-0002-9448-4776; Minotto, Alessandro/0000-0002-6731-3162; BOTTARO, GREGORIO/0000-0001-6196-8638; Durante, Christian/0000-0002-8764-1219; Sorrentino, Roberto/0000-0003-2869-1360; COLLINI, ELISABETTA/0000-0002-1019-9100; Cacialli, Franco/0000-0001-6821-6578; Gatti, Teresa/0000-0001-5343-8055; Silvestrini, Simone/0000-0002-2947-9073	2019	10.1016/j.synthmet.2019.116201
Cabrini, M; Lorenzi, S; Pastore, T; Testa, C; Manfredi, D; Cattano, G; Calignano, F	Corrosion resistance in chloride solution of the AlSi10Mg alloy obtained by means of LPBF	SURFACE AND INTERFACE ANALYSIS	The paper deals with the corrosion resistance in chloride solutions of an AlSi10Mg alloy obtained by laser powder bed fusion (LPBF) process. The potentiodynamic tests were carried out in solutions having different chloride contents. The results emphasize the role of chloride concentration on localized corrosion. The increase of concentration reduces pitting potential. In addition, the influence o…	Cabrini, Marina/0000-0003-3901-8657; Lorenzi, Sergio/0000-0002-1337-7590; Manfredi, Diego/0000-0002-2876-143X; Testa, Cristian/0000-0002-6064-9851	2019	10.1002/sia.6601
Bastianello, M; Diodati, S; Dengo, N; McCafferty, L; Footer, C; Badocco, D; Pastore, P; Darr, J; Gross, S	Quaternary ferrites by batch and continuous flow hydrothermal synthesis: a comparison	CRYSTENGCOMM	Crystalline spinel quaternary ferrites MxZn1-xFe2O4 (M = Co, Ni; x = 0.2, 0.35, 0.5, 0.65, 0.8) were synthesised through conventional batch hydrothermal synthesis (HT) at 135 degrees C as well as via continuous flow hydrothermal synthesis (CHFS). The as prepared compounds were thoroughly characterised from a compositional (ICP-MS, XPS) and structural (XRD) point of view in order to compare the sy…	PASTORE, PAOLO/0000-0003-1448-0175; Gross, Silvia/0000-0003-1860-8711; Dengo, Nicola/0000-0003-2534-7265	2019	10.1039/c9ce01462d
Poggini, L; Londi, G; Milek, M; Naim, A; Lanzilotto, V; Cortigiani, B; Bondino, F; Magnano, E; Otero, E; Sainctavit, P; Arrio, MA; Juhin, A; Marchivie, M; Khusniyarov, MM; Totti, F; Rosa, P; Mannini, M	Surface effects on a photochromic spin-crossover iron(ii) molecular switch adsorbed on highly oriented pyrolytic graphite	NANOSCALE	Thin films of an iron(ii) complex with a photochromic diarylethene-based ligand and featuring a spin-crossover behaviour have been grown by sublimation in ultra-high vacuum on highly oriented pyrolytic graphite and spectroscopically characterized through high-resolution X-ray and ultraviolet photoemission, as well as via X-ray absorption. Temperature-dependent studies demonstrated that the therma…	Naim, Ahmad/0000-0002-0746-6335; Khusniyarov, Marat M/0000-0002-2034-421X; Bondino, Federica/0000-0001-6505-9319; , Chicco/0000-0003-4752-0495; Poggini, Lorenzo/0000-0002-1931-5841; MAGNANO, ELENA/0000-0001-6465-807X; Lanzilotto, Valeria/0000-0001-7132-6380	2019	10.1039/c9nr05947d
Gasparotto, A; Maccato, C; Petala, A; Bebelis, S; Sada, C; Kondarides, DI; Barreca, D	Nanoscale Mn3O4 Thin Film Photoelectrodes Fabricated by a Vapor-Phase Route	ACS APPLIED ENERGY MATERIALS	alpha-Mn3O4 (hausinannite) nanostructured films were fabricated by chemical vapor deposition (CVD) on indium tin oxide (ITO)-coated glass substrates from a beta-diketonate-diamine Mn(II) precursor. Materials were grown in a N-2 + O-2 atmosphere in the presence of water vapor, investigating the influence of growth temperature and total pressure on the system structural, compositional, morphologica…	Maccato, Chiara/0000-0001-6368-5754; Kondarides, Dimitris I./0000-0002-8021-7335; Gasparotto, Alberto/0000-0003-4626-651X; Bebelis, Symeon/0000-0002-6487-2743; Sada, Cinzia/0000-0002-7607-0481	2019	10.1021/acsaem.9b01773
Kim, VO; Broch, K; Belova, V; Chen, YS; Gerlach, A; Schreiber, F; Tamura, H; Della Valle, RG; D'Avino, G; Salzmann, I; Beljonne, D; Rao, A; Friend, R	Singlet exciton fission via an intermolecular charge transfer state in coevaporated pentacene-perfluoropentacene thin films	JOURNAL OF CHEMICAL PHYSICS	Singlet exciton fission is a spin-allowed process in organic semiconductors by which one absorbed photon generates two triplet excitons. Theory predicts that singlet fission is mediated by intermolecular charge-transfer states in solid-state materials with appropriate singlet-triplet energy spacing, but direct evidence for the involvement of such states in the process has not been provided yet. H…	Schreiber, Frank/0000-0003-3659-6718; Gerlach, Alexander/0000-0003-1787-1868; Tamura, Hiroyuki/0000-0002-1345-0647; Belova, Valentina/0000-0002-8142-2090; Salzmann, Ingo/0000-0001-9977-3422; D'Avino, Gabriele/0000-0002-5897-2924; Rao, Akshay/0000-0003-4261-0766; Della Valle, Raffaele Guido/0000-0002-0502-5894	2019	10.1063/1.5130400
Perissi, I	Highlighting the archetypes of sustainability management by means of simple dynamics models	JOURNAL OF SIMULATION	In recent months, we are witnessing a global demonstration of people, predominantly young, spreading a clear message: ?we must do something against climate change and do it immediately, the way we live is no longer sustainable?. Despite the urgency of the actions most of the people are not expert in sustainability, thus it is not always trivial to identify the effectiveness of any action, promote…	Perissi, Ilaria/0000-0001-8996-2748		10.1080/17477778.2019.1679612
Burratti, L; Ciotta, E; Bolli, E; Kaciulis, S; Casalboni, M; De Matteis, F; Garzon-Manjon, A; Scheu, C; Pizzoferrato, R; Prosposito, P	Fluorescence enhancement induced by the interaction of silver nanoclusters with lead ions in water	COLLOIDS AND SURFACES A-PHYSICOCHEMICAL AND ENGINEERING ASPECTS	We have synthesized fluorescent and stable silver nanoclusters (AgNCs) capped with poly (methacrylic acid), PMAA, by UV irradiation process. The NCs are well dispersed in aqueous solution and present a uniform distribution with an average dimension of 1.45 +/- 0.26 nm. The fluorescence excited at 340 nm was found to be sensitive to the presence of heavy metal ions in solution. In particular, a pe…	Burratti, Luca/0000-0003-1515-3264; Ciotta, Erica/0000-0001-6526-0581; Garzon-Manjon, Alba/0000-0003-2954-1102; De Matteis, Fabio/0000-0001-7860-9754	2019	10.1016/j.colsurfa.2019.123634
Assi, A; Federici, S; Bilo, F; Zacco, A; Depero, LE; Bontempi, E	Increased Sustainability of Carbon Dioxide Mineral Sequestration by a Technology Involving Fly Ash Stabilization	MATERIALS	Mineral carbonation, involving reactions of alkaline earth oxides with CO2, has received great attention, as a potential carbon dioxide sequestration technology. Indeed, once converted into mineral carbonate, CO2 can be permanently stored in an inert phase. Several studies have been focalized to the utilization of industrial waste as a feedstock and the reuse of some by-products as possible mater…	Bontempi, Elza/0000-0003-1656-7506; Assi, Ahmad/0000-0002-4742-2038; Depero, Laura Eleonora/0000-0001-7818-3212; ZACCO, Annalisa/0000-0001-6572-8981	2019	10.3390/ma12172714
Gasparotto, A; Maccato, C; Sada, C; Carraro, G; Kondarides, DI; Bebelis, S; Petala, A; La Porta, A; Altantzis, T; Barreca, D	Controlled Surface Modification of ZnO Nanostructures with Amorphous TiO2 for Photoelectrochemical Water Splitting	ADVANCED SUSTAINABLE SYSTEMS	The utilization of solar radiation to trigger photoelectrochemical (PEC) water splitting has gained interest for sustainable energy production. In this study, attention is focused on the development of ZnO-TiO2 nanocomposite photoanodes. The target systems are obtained by growing porous arrays of highly crystalline, elongated ZnO nanostructures on indium tin oxide (ITO) by chemical vapor depositi…	Maccato, Chiara/0000-0001-6368-5754; Kondarides, Dimitris I./0000-0002-8021-7335; Bebelis, Symeon/0000-0002-6487-2743; Sada, Cinzia/0000-0002-7607-0481; Altantzis, Thomas/0000-0002-4940-7931; Gasparotto, Alberto/0000-0003-4626-651X	2019	10.1002/adsu.201900046
Benassi, L; Zanoletti, A; Depero, LE; Bontempi, E	Sewage sludge ash recovery as valuable raw material for chemical stabilization of leachable heavy metals	JOURNAL OF ENVIRONMENTAL MANAGEMENT	This paper proposes, for the first time, the use of sewage sludge ash (SSA), obtained by sludge combustion for the stabilization of fly ashes containing heavy metals as Pb and Zn. In particular, the proposed method aims to take advantage of valuable raw materials present in SSA, such as phosphate, silica, and alumina. The stabilization has been explained by the synergic phosphate, carbonation, an…	Zanoletti, Alessandra/0000-0003-0225-7048; Depero, Laura Eleonora/0000-0001-7818-3212; Bontempi, Elza/0000-0003-1656-7506	2019	10.1016/j.jenvman.2019.05.104
de Brito, JF; Genovese, C; Tavella, F; Ampelli, C; Zanoni, MVB; Centi, G; Perathoner, S	CO2 Reduction of Hybrid Cu2O-Cu/Gas Diffusion Layer Electrodes and their Integration in a Cu-based Photoelectrocatalytic Cell	CHEMSUSCHEM	Cu2O/gas diffusion layer (GDL) electrodes prepared by electrodeposition were studied for the electrocatalytic reduction of CO2. The designed electrode was also tested in solar-light-induced CO2 conversion in combination with a CuO/NtTiO(2) photoanode using a compact photoelectrocatalytic (PEC) cell. Both PEC cell electrodes were prepared using non-critical raw materials and low cost, easily scala…	ZANONI, MARIA VALNICE BOLDRIN/0000-0002-2296-1393; GENOVESE, Chiara/0000-0002-4939-2442; Ampelli, Claudio/0000-0001-7048-976X; de Brito, Juliana F/0000-0002-6014-7739; Centi, Gabriele/0000-0001-5626-9840; Perathoner, Siglinda/0000-0001-8814-1972	2019	10.1002/cssc.201901352
Sanzone, A; Mattiello, S; Garavaglia, GM; Calascibetta, AM; Ceriani, C; Sassi, M; Beverina, L	Efficient synthesis of organic semiconductors by Suzuki-Miyaura coupling in an aromatic micellar medium	GREEN CHEMISTRY	Micellar catalysis enables carrying out Suzuki-Miyaura couplings in water under exceptionally mild conditions. Extension of such a protocol to the sustainable synthesis of highly conjugated, poorly soluble materials like [1]benzothieno[3,2-b][1]benzothiophene (BTBT) requires redesigning of the surfactants employed. The here reported new naphthalenediimide containing amphiphilic derivative, PiNap-…	MATTIELLO, SARA/0000-0002-2907-0964; Sassi, Mauro/0000-0002-5529-6449	2019	10.1039/c9gc01071h
Ferone, C; Capasso, I; Bonati, A; Roviello, G; Montagnaro, F; Santoro, L; Turco, R; Cioffi, R	Sustainable management of water potabilization sludge by means of geopolymers production	JOURNAL OF CLEANER PRODUCTION	Alumina-containing water potabilization sludge (WPS) is one of the main wastes produced by reservoir management activities. This kind of residues, deriving from treatment processes for water potabilization, recently attracted great attention as starting raw material in the production of innovative building materials. In this study, the use of WPS as aluminosilicate source for the synthesis of geo…	bonati, antonio/0000-0001-5016-196X; Rosa, Turco/0000-0002-2681-4286; Ferone, Claudio/0000-0002-8660-3771; CAPASSO, ILARIA/0000-0002-7536-404X; Cioffi, Raffaele/0000-0002-7757-6361	2019	10.1016/j.jclepro.2019.04.299
Sinisi, A; Esposti, MD; Toselli, M; Morselli, D; Fabbri, P	Biobased Ketal-Diester Additives Derived from Levulinic Acid: Synthesis and Effect on the Thermal Stability and Thermo-Mechanical Properties of Poly(vinyl chloride)	ACS SUSTAINABLE CHEMISTRY & ENGINEERING	A new class of biobased plasticizers is herein proposed as a replacement of the currently used additives. The molecules were synthesized by a selective protecting group -free route, which was developed in order to produce valuable asymmetrical ketal-diester derivatives from the renewable levulinic acid, overcoming the typical drawbacks of these types of reactions. Five molecules with different si…	Esposti, Micaela Degli/0000-0002-4513-8527; Morselli, Davide/0000-0003-3231-7769; Fabbri, Paola/0000-0002-1903-8290	2019	10.1021/acssuschemeng.9b02177
Carlone, A; Bernardi, L	Enantioselective organocatalytic approaches to active pharmaceutical ingredients - selected industrial examples	PHYSICAL SCIENCES REVIEWS	Catalysis is, often, the preferred approach to access chiral molecules in enantioenriched form both in academia and in industry; nowadays, organocatalysis is recognised as the third pillar in asymmetric catalysis, along with bio- and metal-catalysis. Despite enormous advancements in academic research, there is a common belief that organocatalysis is not developed enough to be applicable in indust…	Carlone, Armando/0000-0003-2983-6445	2019	10.1515/psr-2018-0097
Thompson, WA; Olivo, A; Zanardo, D; Cruciani, G; Menegazzo, F; Signoretto, M; Maroto-Valer, MM	Systematic study of TiO2/ZnO mixed metal oxides for CO2 photoreduction	RSC ADVANCES	A two component three degree simplex lattice experimental design was employed to evaluate the impact of different mixing fractions of TiO2 and ZnO on an ordered mesoporous SBA-15 support for CO2 photoreduction. It was anticipated that the combined advantages of TiO2 and ZnO: low cost, non-toxicity and combined electronic properties would facilitate CO2 photoreduction. The fraction of ZnO had a st…	Olivo, Alberto/0000-0002-6425-5518; Thompson, Warren/0000-0003-1474-7810; Cruciani, Giuseppe/0000-0002-4269-697X; Maroto-Valer, Mercedes/0000-0003-1643-2863	2019	10.1039/c9ra03435h
Jantan, KA; Chan, KW; Melis, L; White, AJP; Marchio, L; Deplano, P; Serpe, A; Wilton-Ely, JDET	From Recovered Palladium to Molecular and Nanoscale Catalysts	ACS SUSTAINABLE CHEMISTRY & ENGINEERING	[PdI2(Me(2)dazdt)] is obtained from palladium powder via a 100% atom -economical Pd(0) leaching reaction using Me(2)dazdt (N,N'-dimethyl-perhydrodiazepine-2,3-dithione) and iodine. This complex is a versatile starting point for ligand exchange reactions with (di)phosphines, yielding trans-[PdI2(PPh3)(2)] and [PdI2(dppe)] (dppe = 1,2-bis-(diphenylphosphino)ethane). Further reaction with dithiocarb…	Wilton-Ely, James D/0000-0002-5192-3038; Marchio', Luciano/0000-0002-0025-1104; SERPE, ANGELA/0000-0002-3476-0636; DEPLANO, PAOLA/0000-0002-8861-8619	2019	10.1021/acssuschemeng.9b01877
Gontrani, L; Plechkova, NV; Bonomo, M	In-Depth Physico-Chemical and Structural Investigation of a Dicarboxylic Acid/Choline Chloride Natural Deep Eutectic Solvent (NADES): A Spotlight on the Importance of a Rigorous Preparation Procedure	ACS SUSTAINABLE CHEMISTRY & ENGINEERING	In this study, we report the density, viscosity, conductivity, and X-ray diffraction profile of the deep eutectic solvent (DES) formed by choline chloride and different dicarboxylic acids (i.e., malonic, oxalic, succinic, or fumaric acid) at room temperature. These compounds have recently found several applications in green chemistry methodologies and consequently require the highest purity stand…	Gontrani, Lorenzo/0000-0001-8212-7029; Bonomo, Matteo/0000-0002-1944-2664;	2019	10.1021/acssuschemeng.9b02402
Dragonetti, C; Magni, M; Colombo, A; Fagnani, F; Roberto, D; Melchiorre, F; Biagini, P; Fantacci, S	Towards efficient sustainable full-copper dye-sensitized solar cells	DALTON TRANSACTIONS	Two new heteroleptic copper(i) sensitizers bearing 6,6 '-dimethyl-2,2 '-bipyridine-4,4 '-dibenzoic acid, to anchor the dye on the titania surface, and a pi-delocalized 2-(R-phenyl)-1H-phenanthro[9,10-d]imidazole (R = NPh2 or O-hexyl) ancillary ligand were prepared and well characterized. Their performance as dyes in DSSCs is quite similar to that of the related complex bearing 2,9-dimesityl-1,10-…	Magni, Mirko/0000-0001-9776-2973; Colombo, Alessia/0000-0001-8004-3200; ROBERTO, DOMINIQUE MARIE/0000-0001-9659-4760	2019	10.1039/c9dt00790c
Colombo, A; Dragonetti, C; Fagnani, F; Roberto, D; Melchiorre, F; Biagini, P	Improving the efficiency of copper-dye-sensitized solar cells by manipulating the electrolyte solution	DALTON TRANSACTIONS	The use of a copper(i) dye, bearing a 2,9-dimesityl-1,10-phenanthroline and a 6,6 '-dimethyl-2,2 '-bipyridine-4,4 '-dibenzoic acid, was investigated in DSSCs with various electrolyte solutions based on two different redox mediators, namely the common I-/I-3(-) couple and an interesting copper electron shuttle. The experimental results provide evidence of the importance of the redox mediator conce…	ROBERTO, DOMINIQUE MARIE/0000-0001-9659-4760; Colombo, Alessia/0000-0001-8004-3200	2019	10.1039/c9dt01448a
Vitale, A; Massaglia, G; Chiodoni, A; Bongiovanni, R; Pirri, CF; Quaglio, M	Tuning Porosity and Functionality of Electrospun Rubber Nanofiber Mats by Photo-Crosslinking	ACS APPLIED MATERIALS & INTERFACES	The present work proposes a versatile and efficient method to fabricate rubber nanofiber membranes with a controlled morphology and tailored functionality, based on the application of photoinduced thiol-ene cross-linking reactions to electrospun mats. Besides preventing the polymer cold flow and freezing the structure obtained by electrospinning, the photocuring step finely controls the morpholog…	Quaglio, Marzia/0000-0003-3707-8760; bongiovanni, roberta/0000-0002-2607-9461; Vitale, Alessandra/0000-0002-8682-3125	2019	10.1021/acsami.9b04599
Buscaino, G; Mattiazzo, G; Sannino, G; Papale, E; Bracco, G; Grammauta, R; Carillo, A; Kenny, JM; De Cristofaro, N; Ceraulo, M; Mazzola, S	Acoustic impact of a wave energy converter in Mediterranean shallow waters	SCIENTIFIC REPORTS	In this study, underwater noise from a full-scale wave energy converter system (ISWEC), installed on the coast of Pantelleria Island (central Mediterranean Sea), was characterized. The noise was measured using an autonomous acoustic recorder anchored to the sea bottom 40 m from the ISWEC hull. Acoustic monitoring continued for 15 months, starting 7 months before (PRE), 2 months during (INST) and …	Ceraulo, Maria/0000-0003-2140-1367; KENNY, JOSE/0000-0001-6329-3048; Sannino, Gianmaria/0000-0002-3985-9432; Bracco, Giovanni/0000-0002-4793-202X; buscaino, giuseppa/0000-0002-4848-4185	2019	10.1038/s41598-019-45926-1
Bellini, M; Pagliaro, MV; Lenarda, A; Fornasiero, P; Marelli, M; Evangelisti, C; Innocenti, M; Jia, QY; Mukerjee, S; Jankovic, J; Wang, LQ; Varcoe, JR; Krishnamurthy, CB; Grinberg, I; Davydova, E; Dekel, DR; Miller, HA; Vizza, F	Palladium-Ceria Catalysts with Enhanced Alkaline Hydrogen Oxidation Activity for Anion Exchange Membrane Fuel Cells	ACS APPLIED ENERGY MATERIALS	Anion exchange membrane fuel cells (AEMFCs) offer several important advantages with respect to proton exchange membrane fuel cells, including the possibility of avoiding the use of platinum catalysts to help overcome the high cost of fuel cell systems. Despite such potential benefits, the slow kinetics of the hydrogen oxidation reaction (HOR) in alkaline media and limitations in performance stabi…	Fornasiero, Paolo/0000-0003-1082-9157; Bellini, Marco/0000-0001-6901-7781; Evangelisti, Claudio/0000-0002-8855-2592; Marelli, Marcello/0000-0003-3662-7326; Fornasiero, Paolo/0000-0003-1082-9157; Innocenti, Massimo/0000-0003-1044-5583	2019	10.1021/acsaem.9b00657
Di Lecce, D; Minnetti, L; Polidoro, D; Marangon, V; Hassoun, J	Triglyme-based electrolyte for sodium-ion and sodium-sulfur batteries	IONICS	Herein, we investigate a lowly flammable electrolyte formed by dissolving sodium trifluoromethanesulfonate (NaCF3SO3) salt in triethylene glycol dimethyl ether (TREGDME) solvent as suitable medium for application in Na-ion and Na/S cells. The study, performed by using various electrochemical techniques, including impedance spectroscopy, voltammetry, and galvanostatic cycling, indicates for the so…	DI LECCE, DANIELE/0000-0003-1290-1140; Marangon, Vittorio/0000-0003-4722-8988	2019	10.1007/s11581-019-02878-w
Lanzafame, P; Papanikolaou, G; Perathoner, S; Centi, G; Migliori, M; Catizzone, E; Giordano, G	Reassembly mechanism in Fe-Silicalite during NH4OH post-treatment and relation with the acidity and catalytic reactivity	APPLIED CATALYSIS A-GENERAL	The treatment in NH4OH of Fe-Silicalite (Fe-MFI) catalysts creates mesopores with a different mechanism with respect to the conventional desilication treatment. A reassembling of Fe-MFI nanocrystals is induced by the creation of isolated defects on the surface of these nanocrystals, as well as a change in the amorphous layer between nanocrystals acting as glue to assemble them into larger round-s…	Centi, Gabriele/0000-0001-5626-9840; Catizzone, Enrico/0000-0002-3962-9493; PAPANIKOLAOU, GEORGIA/0000-0001-6295-0106; LANZAFAME, PAOLA/0000-0002-6092-346X	2019	10.1016/j.apcata.2019.05.015
Ortelli, S; Malucelli, G; Blosi, M; Zanoni, I; Costa, AL	NanoTiO(2)@DNA complex: a novel eco, durable, fire retardant design strategy for cotton textiles	JOURNAL OF COLLOID AND INTERFACE SCIENCE	A strategy for the design of cotton flame retardant coatings is described, exploiting the natural intumescent formulation of nucleic acids, the intrinsic thermal inertia of TiO2 ceramic phase and the strong affinity that TiO2 nanoparticles shows for amphiphilic biomolecules (e.g. proteins, nucleic acids) and hydrophilic substrates. Two different self-assembled TiO2@DNA systems are obtained by mix…	Costa, Anna Luisa/0000-0003-1407-6498; Ortelli, Simona/0000-0002-0868-3315; Malucelli, Giulio/0000-0002-0459-7698	2019	10.1016/j.jcis.2019.03.055
Perathoner, S; Centi, G	Catalysis for solar-driven chemistry: The role of electrocatalysis	CATALYSIS TODAY	Solar-driven chemistry identifies the emerging area to enable the transition to a low-carbon and sustainable chemical production based on the use of renewable energy rather than on the utilization of fossil sources. This perspective paper analyzes the role of electrocatalysis as a crucial technology to enable this transition, by presenting selected examples, mainly around two key reactions (NH3 d…	Centi, Gabriele/0000-0001-5626-9840	2019	10.1016/j.cattod.2018.03.005
Ochoa, JV; Farci, E; Cavani, F; Sinisi, F; Artiglia, L; Agnoli, S; Granozzi, G; Paganin, MC; Malfatti, L	CeOx/TiO2 (Rutile) Nanocomposites for the Low-Temperature Dehydrogenation of Ethanol to Acetaldehyde: A Diffuse Reflectance Infrared Fourier Transform Spectroscopy-Mass Spectrometry Study	ACS APPLIED NANO MATERIALS	Two nanocomposites of different layer thicknesses were synthesized by impregnation of a rutile titania support with a reduced ceria solution. An in situ diffuse reflectance infrared fourier-transform spectroscopy-mass spectrometry study of these materials, compared with the parent single oxides, has shown remarkable differences in the interaction with ethanol depending on the layer thickness and …	Granozzi, Gaetano/0000-0002-9509-6142; CAVANI, FABRIZIO/0000-0002-4282-6260; AGNOLI, STEFANO/0000-0001-5204-5460	2019	10.1021/acsanm.9b00366
Bertasi, F; Pagot, G; Vezzu, K; Nale, A; Pace, G; Bang, YH; Crivellaro, G; Negro, E; Di Noto, V	Lithiated Nanoparticles Doped with Ionic Liquids as Quasi-Solid Electrolytes for Lithium Batteries	ELECTROCHIMICA ACTA	This work reports two quasi-solid composite electrolytes based on LiFT (Lithiated Fluorinated Titania) nanopowder and either 1-ethyl-3-methylimidazolium tetrafluoroborate (EMImBF(4)) or 1-ethyl-3-methylimidazolium bis(trifluoromethylsulfonyl)imide (EMImTFSI) ionic liquid (IL). In details, LiFT nanopowder is doped with ca. 30 wt% of IL, giving rise to materials with formula LiFT/(EMImBF(4))(0.)(18…	Pagot, Gioele/0000-0002-4015-6670	2019	10.1016/j.electacta.2019.03.167
Coppola, L; Coffetti, D; Crotti, E; Gazzaniga, G; Pastore, T	An Empathetic Added Sustainability Index (EASI) for cementitious based construction materials	JOURNAL OF CLEANER PRODUCTION	The concrete industry is the largest consumer of natural resources and the Portland cement, the binder of modern concrete mixtures, is not environmentally friendly. The world's cement production, in fact, contributes to the earth's atmosphere about 5-7% of the total CO2 emissions, CO2 being mainly responsible for global warming and climate change. As a consequence, concrete industry in the future…	Coffetti, Denny/0000-0003-1217-4983	2019	10.1016/j.jclepro.2019.02.160
Kollar, J; Morelli, A; Chiellini, F; Miertus, S; Bakos, D; Frecer, V	Epithelial cell adhesion on films mimicking surface of polymeric scaffolds of artificial urethra compared to molecular modeling of integrin binding	JOURNAL OF BIOACTIVE AND COMPATIBLE POLYMERS	In this study, a combined experimental and computational study of long-term human bladder epithelial cell line HBLAK adhesion and proliferation on five different polymeric surfaces, namely hyaluronic acid, amylose, collagen, polyhydroxybutyrate, and polylactic acid, was performed with the goal to understand the nature of the attraction between various surface materials and a simplified model of t…	Chiellini, Federica/0000-0003-4680-9975	2019	10.1177/0883911519843309
Ciapponi, R; Turri, S; Levi, M	Mechanical Reinforcement by Microalgal Biofiller in Novel Thermoplastic Biocompounds from Plasticized Gluten	MATERIALS	The aim of this work was to develop new bioplastic compounds from wheat gluten, biobased plasticizers (glycerol, octanoic acid and 1,4-butanediol), and microalgal biomass as a filler. The effects of the composition on tensile properties, thermal stability, and water sensitivity were investigated. Microalgal biomass was added with the selected quantities: 10, 20, and 30 per hundred parts (php). Me…	Levi, Marinella/0000-0001-5921-7202; Ciapponi, Riccardo/0000-0002-7384-586X	2019	10.3390/ma12091476
Cavallaro, G; Milioto, S; Nigamatzyanova, L; Alchatova, F; Fakhrullin, R; Lazzara, G	Pickering Emulsion Gels Based on Halloysite Nanotubes and Ionic Biopolymers: Properties and Cleaning Action on Marble Surface	ACS APPLIED NANO MATERIALS	We have fabricated ecocompatible Pickering emulsions based on halloysite nanotubes and ionic biopolymers (chitosan and pectin) from renewable resources. The effect of pectin and chitosan on the Pickering emulsion was investigated by direct visualization of the oil droplets and by the thermodynamic characterization at the interface. Pectin enhances the Pickering emulsion stability, while a phase s…	Nigamatzyanova, Laysan/0000-0003-3016-675X; Akhatova, Farida Serikovna/0000-0002-8775-5267; Fakhrullin, Rawil/0000-0003-2015-7649; Lazzara, Giuseppe/0000-0003-1953-5817; , Giuseppe/0000-0002-2145-0161	2019	10.1021/acsanm.9b00487
Lenarda, A; Bevilacqua, M; Tavagnacco, C; Nasi, L; Criado, A; Vizza, F; Melchionna, M; Prato, M; Fornasiero, P	Selective Electrocatalytic H2O2 Generation by Cobalt@N-Doped Graphitic Carbon Core-Shell Nanohybrids	CHEMSUSCHEM	Electrocatalytic oxygen reduction (ORR) is an emerging synthetic strategy to prepare H2O2 in a sustainable fashion. N-doped graphitic carbon with embedded cobalt nanoparticles was selected as an advanced material able to selectively trigger the ORR to form H2O2 with a faradaic efficiency of almost 100 % at very positive applied potentials. The production of H2O2 proceeded with high rates as calcu…	Fornasiero, Paolo/0000-0003-1082-9157; Melchionna, Michele/0000-0001-9813-9753; Fornasiero, Paolo/0000-0003-1082-9157; Criado, Alejandro/0000-0002-9732-513X; Prato, Maurizio/0000-0002-8869-8612; TAVAGNACCO, CLAUDIO/0000-0003-0704-8210	2019	10.1002/cssc.201900238
Ferrara, C; Vigo, E; Albini, B; Galinetto, P; Milanese, C; Tealdi, C; Quartarone, E; Passerini, S; Mustarelli, P	Efficiency and Quality Issues in the Production of Black Phosphorus by Mechanochemical Synthesis: A Multi-Technique Approach	ACS APPLIED ENERGY MATERIALS	Black phosphorus (BP) is a two-dimensional material potentially of great interest for applications in the fields of energy, sensing, and microelectronics. One of the most interesting methods to obtain BP is the conversion from red phosphorus (RP) by means of high-energy mechanochemical synthesis. To date, however, this synthesis process was not well characterized. In this work, starting from the …	Passerini, Stefano/0000-0002-6606-5304	2019	10.1021/acsaem.9b00132
Melchionna, M; Fornasiero, P; Prato, M	The Rise of Hydrogen Peroxide as the Main Product by Metal-Free Catalysis in Oxygen Reductions	ADVANCED MATERIALS	One of the recent trends in electrocatalytic reactions involves the oxygen reduction reaction (ORR), where a new paradigm has been shaped to exploit this reaction for the synthesis of hydrogen peroxide (H2O2). H2O2 is a very versatile chemical of high commercial value, prepared currently through poorly sustainable processes. The emergence of metal-free carbon catalysts for the selective synthesis…	Melchionna, Michele/0000-0001-9813-9753; Fornasiero, Paolo/0000-0003-1082-9157; Fornasiero, Paolo/0000-0003-1082-9157; Prato, Maurizio/0000-0002-8869-8612	2019	10.1002/adma.201802920
Zheng, J; Busch, M; Artiglia, L; Skala, T; Rossmeisl, J; Agnoli, S	Multiple Reaction Paths for CO Oxidation on a 2D SnOx Nano-Oxide on the Pt(110) Surface: Intrinsic Reactivity and Spillover	ADVANCED MATERIALS INTERFACES	An interface stabilized SnOx/Pt(110) nano-oxide characterized by a c(2 x 4) surface reconstruction is prepared and characterized by low-energy electron diffraction (LEED), synchrotron radiation photoemission spectroscopy (SRPES), and scanning tunneling microscopy (STM). Based on the experimental data, atomic models for the nano-oxide are proposed and then validated by comparing the experimental r…	Skala, Tomas/0000-0003-2909-9422; AGNOLI, STEFANO/0000-0001-5204-5460; Busch, Michael/0000-0003-3883-2868	2019	10.1002/admi.201801874
Nasi, R; Esposito, S; Freyria, FS; Armandi, M; Gadhi, TA; Hernandez, S; Rivolo, P; Ditaranto, N; Bonelli, B	Application of Reverse Micelle Sol-Gel Synthesis for Bulk Doping and Heteroatoms Surface Enrichment in Mo-Doped TiO2 Nanoparticles	MATERIALS	TiO2 nanoparticles containing 0.0, 1.0, 5.0, and 10.0 wt.% Mo were prepared by a reverse micelle template assisted sol-gel method allowing the dispersion of Mo atoms in the TiO2 matrix. Their textural and surface properties were characterized by means of X-ray powder diffraction, micro-Raman spectroscopy, N-2 adsorption/desorption isotherms at -196 degrees C, energy dispersive X-ray analysis coup…	Gadhi, Tanveer Ahmed/0000-0002-2544-4690; Hernandez, Simelys/0000-0002-6722-0273; Nasi, Roberto/0000-0002-5377-8006	2019	10.3390/ma12060937
Giuffre, AM; Louadj, L; Rizzo, P; Poiana, M; Sicari, V	Packaging and storage condition affect the physicochemical properties of red raspberries (Rubus idaeus L., cv. Erika)	FOOD CONTROL	Packaging material and the storage temperature on red raspberries (Rubus idaeus L.) were studied in this paper. Raspberries were stored following their harvesting in different conditions: in the fridge at 1 degrees C and in the freezer at - 20 degrees C, using different packaging materials: two Nanoactive films, Nanoactive A (NA) and Nanoactive B (NB), a biaxially oriented polyethylene terephthal…	Poiana, Marco/0000-0001-6117-0482; Giuffre, Angelo Maria/0000-0002-4663-8056; RIZZO, Paola/0000-0002-3375-3119; Vincenzo, Sicari/0000-0001-7550-9571	2019	10.1016/j.foodcont.2018.10.027
Giaccherini, A; Baldassarre, A; Donini, L; Lepore, GO; Caneschi, A; De Luca, A; Innocenti, M; Montegrossi, G; Giuseppe, C; Oberhauser, W; Pardi, L; Romanelli, M; Mannini, M; Di Benedetto, F	Sustainable synthesis of quaternary sulphides: The problem of the uptake of zinc in CZTS	JOURNAL OF ALLOYS AND COMPOUNDS	Quaternary semiconducting sulphides are promising and sustainable candidates to replace the silicon-based semiconducting materials currently leading the market of the photovoltaic energy production. Recent efforts were paid to CZTS (Copper Zinc Tin Sulphides) semiconductors, due to their suitable electronic properties, the abundance in nature of their constituents, and the low toxicity. In this s…	Di Benedetto, Francesco/0000-0001-6755-8816; Mannini, Matteo/0000-0001-7549-2124; Cucinotta, Giuseppe/0000-0003-1637-0850; Innocenti, Massimo/0000-0003-1044-5583; Lepore, Giovanni Orazio/0000-0002-8705-7979; Montegrossi, Giordano/0000-0002-2006-6117	2019	10.1016/j.jallcom.2018.10.201
Diodati, S; Hennemann, J; Fresno, F; Gialanella, S; Dolcet, P; Stangar, UL; Smarsly, BM; Gross, S	Easy and Green Route towards Nanostructured ZnO as an Active Sensing Material with Unexpected H2S Dosimeter-Type Behaviour	EUROPEAN JOURNAL OF INORGANIC CHEMISTRY	Nanostructured ZnO particles were prepared through a straightforward, quick and low-temperature synthesis route involving coprecipitation of the metal precursor salts with oxalic acid, followed by hydrothermal treatment at 135 or 160 degrees C. The synthesised nanostructured powders were thoroughly characterised by a wide array of analytical techniques from the morphological (Scanning Electron Mi…	Diodati, Stefano/0000-0002-3005-1365; Fresno, Fernando/0000-0001-6622-6721; Gross, Silvia/0000-0003-1860-8711	2019	10.1002/ejic.201801334
Centi, G; Cejka, J	Needs and Gaps for Catalysis in Addressing Transitions in Chemistry and Energy from a Sustainability Perspective	CHEMSUSCHEM	Catalysis is undergoing a major transition resulting from significant changes in chemical and energy production. To honor the 50th anniversary of establishing the Jerzy Haber Institute of Catalysis and Surface Chemistry, this Essay discusses, from a forward-looking, personal and somewhat provocative perspective, the needs and gaps of catalysis to address the ongoing transition in chemistry and en…	Centi, Gabriele/0000-0001-5626-9840; Cejka, Jiri/0000-0003-1400-1031;	2019	10.1002/cssc.201802637
Aliotta, L; Gigante, V; Coltelli, MB; Cinelli, P; Lazzeri, A	Evaluation of Mechanical and Interfacial Properties of Bio-Composites Based on Poly(Lactic Acid) with Natural Cellulose Fibers	INTERNATIONAL JOURNAL OF MOLECULAR SCIENCES	The circular economy policy and the interest for sustainable material are inducing a constant expansion of the bio-composites market. The opportunity of using natural fibers in bio-based and biodegradable polymeric matrices, derived from industrial and/or agricultural waste, represents a stimulating challenge in the replacement of traditional composites based on fossil sources. The coupling of bi…	Lazzeri, Andrea/0000-0002-9463-1502; Cinelli, Patrizia/0000-0003-2401-133X; COLTELLI, MARIA BEATRICE/0000-0002-0418-8974; Gigante, Vito/0000-0003-3896-9629; /0000-0003-1876-5995	2019	10.3390/ijms20040960
Jagdale, P; Ziegler, D; Rovere, M; Tulliani, JM; Tagliaferro, A	Waste Coffee Ground Biochar: A Material for Humidity Sensors	SENSORS	Worldwide consumption of coffee exceeds 11 billion tons/year. Used coffee grounds end up as landfill. However, the unique structural properties of its porous surface make coffee grounds popular for the adsorption of gaseous molecules. In the present work, we demonstrate the use of coffee grounds as a potential and cheap source for biochar carbon. The produced coffee ground biochar (CGB) was inves…	Ziegler, Daniele/0000-0002-4879-1193; tagliaferro, alberto/0000-0003-1607-5624; Tulliani, Jean-Marc/0000-0003-2419-4383; Jagdale, Pravin/0000-0002-2486-0326	2019	10.3390/s19040801
Santi, R; Cigada, A; Del Curto, B; Fare, S	Modulable properties of PVA/cellulose fiber composites	JOURNAL OF APPLIED BIOMATERIALS & FUNCTIONAL MATERIALS	Purpose: Development of PVA/cellulose fiber composite material with modulable properties, obtained through the increase of reinforcement and heat treatments in order to optimize the composite in terms of mechanical, thermal, and degradation properties. Methods: The composite was designed selecting as matrix an experimental formulation based on water-soluble, biodegradable, polyvinyl alcohol (PVA)…	SANTI, ROMINA/0000-0003-2012-517X; Fare', Silvia/0000-0002-0303-1131	2019	10.1177/2280800019831224
Coltelli, MB; Cinelli, P; Gigante, V; Aliotta, L; Morganti, P; Panariello, L; Lazzeri, A	Chitin Nanofibrils in Poly(Lactic Acid) (PLA) Nanocomposites: Dispersion and Thermo-Mechanical Properties	INTERNATIONAL JOURNAL OF MOLECULAR SCIENCES	Chitin-nanofibrils are obtained in water suspension at low concentration, as nanoparticles normally are, to avoid their aggregation. The addition of the fibrils in molten PLA during extrusion is thus difficult and disadvantageous. In the present paper, the use of poly(ethylene glycol) (PEG) is proposed to prepare a solid pre-composite by water evaporation. The pre-composite is then added to PLA i…	Cinelli, Patrizia/0000-0003-2401-133X; Lazzeri, Andrea/0000-0002-9463-1502; Gigante, Vito/0000-0003-3896-9629; Panariello, Luca/0000-0003-0172-6682; COLTELLI, MARIA BEATRICE/0000-0002-0418-8974; /0000-0003-1876-5995	2019	10.3390/ijms20030504
Tummino, ML; Testa, ML; Malandrino, M; Gamberini, R; Prevot, AB; Magnacca, G; Laurenti, E	Green Waste-Derived Substances Immobilized on SBA-15 Silica: Surface Properties, Adsorbing and Photosensitizing Activities towards Organic and Inorganic Substrates	NANOMATERIALS	Urban wastes are a potential source of environment contamination, especially when they are not properly disposed. Nowadays, researchers are finding innovative solutions for recycling and reusing wastes in order to favour a sustainable development from the viewpoint of circular economy. In this context, the lignin-like fraction of biomass derived from Green Compost is a cost-effective source of so…	TUMMINO, MARIA LAURA/0000-0002-1869-2602; Laurenti, Enzo/0000-0001-7363-4002; magnacca, giuliana/0000-0002-3798-5232; Malandrino, Mery/0000-0002-8352-0487; Testa, Maria Luisa/0000-0003-1898-6608	2019	10.3390/nano9020162
Ciotta, E; Prosposito, P; Pizzoferrato, R	Positive curvature in Stern-Volmer plot described by a generalized model for static quenching	JOURNAL OF LUMINESCENCE	The fluorescence quenching effect of unfolded-fullerene nanoparticles (UFNPs) in the presence of Cu2+ ions in water solution has been investigated for a broad range of fluorophore/quencher concentrations. The experimental Stern-Volmer plot exhibited a nonlinear behaviour with an initial upward curvature even though carbon nanoparticles are known to form stable complexes with metal ions and thus a…	Ciotta, Erica/0000-0001-6526-0581	2019	10.1016/j.jlumin.2018.10.106
Heard, CJ; Cejka, J; Opanasenko, M; Nachtigall, P; Centi, G; Perathoner, S	2D Oxide Nanomaterials to Address the Energy Transition and Catalysis	ADVANCED MATERIALS	2D oxide nanomaterials constitute a broad range of materials, with a wide array of current and potential applications, particularly in the fields of energy storage and catalysis for sustainable energy production. Despite the many similarities in structure, composition, and synthetic methods and uses, the current literature on layered oxides is diverse and disconnected. A number of reviews can be …	Cejka, Jiri/0000-0003-1400-1031; Opanasenko, Maksym/0000-0002-0833-8255; Centi, Gabriele/0000-0001-5626-9840; Perathoner, Siglinda/0000-0001-8814-1972; Nachtigall, Petr/0000-0002-1628-7275	2019	10.1002/adma.201801712
Rigoldi, A; Trogu, EF; MarcheseIli, GC; Artizzu, F; Picone, N; Colledani, M; Deplano, P; Serpe, A	Advances in Recovering Noble Metals from Waste Printed Circuit Boards (WPCBs)	ACS SUSTAINABLE CHEMISTRY & ENGINEERING	An extensive investigation on the noble metal (NM) content in different classes of waste printed circuit boards (WPCBs: random access memories, RAMs; network interface controllers, NICs; motherboards; TV, DVD/CD player, hard-drive, and mobile phone PCBs) has been performed to define the most appropriate case study and provide a robust database useful for workers in the waste valorization field. F…	Marchio', Luciano/0000-0002-0025-1104; SERPE, ANGELA/0000-0002-3476-0636; DEPLANO, PAOLA/0000-0002-8861-8619	2019	10.1021/acssuschemeng.8b04983
Giosue, C; Mobili, A; Yu, QL; Brouwers, HJH; Ruello, ML; Tittarelli, F	Properties of multifunctional lightweight mortars containing zeolite and natural fibers	JOURNAL OF SUSTAINABLE CEMENT-BASED MATERIALS	The article focuses on the development of innovative and multifunctional mortars with low environmental impact for indoor applications acting as passive systems to moderate extremes of humidity and to lower the concentration of pollutants. Mortars are manufactured by keeping constant the water/binder ratio, using sand as reference aggregate, and by replacing the total volume of sand with zeolite.…	Mobili, Alessandra/0000-0002-0891-5649; Giosue, Chiara/0000-0001-6064-6768; Yu, Qingliang/0000-0001-8578-3945	2019	10.1080/21650373.2019.1615012
Bilo, F; Zanoletti, A; Borgese, L; Depero, LE; Bontempi, E	Chemical Analysis of Air Particulate Matter Trapped by a Porous Material, Synthesized from Silica Fume and Sodium Alginate	JOURNAL OF NANOMATERIALS	This work shows the ability of a new porous material (SUNSPACE), obtained by industrial by-products, to sequestrate air particulate matter (PM). This activity allows introducing the azure chemistry approach, devoted to better link new remediation strategies and sustainability. In particular, SUNSPACE is synthesized from silica fume and sodium alginate; it can be shaped in a porous solid, and it l…	Bontempi, Elza/0000-0003-1656-7506; Zanoletti, Alessandra/0000-0003-0225-7048; Depero, Laura Eleonora/0000-0001-7818-3212; Bilo, Fabjola/0000-0001-7362-3258	2019	10.1155/2019/1732196
Di Credico, B; Tagliaro, I; Cobani, E; Conzatti, L; D'Arienzo, M; Giannini, L; Mascotto, S; Scotti, R; Stagnaro, P; Tadiello, L	A Green Approach for Preparing High-Loaded Sepiolite/Polymer Biocomposites	NANOMATERIALS	Global industry is showing a great interest in the field of sustainability owing to the increased attention for ecological safety and utilization of renewable materials. For the scientific community, the challenge lies in the identification of greener synthetic approaches for reducing the environmental impact. In this context, we propose the preparation of novel biocomposites consisting of natura…	Conzatti, Lucia/0000-0003-1899-8262; Stagnaro, Paola/0000-0003-3437-1435; DI CREDICO, BARBARA/0000-0003-0431-0148	2019	10.3390/nano9010046
Mazzali, F; Orzech, MW; Adomkevicius, A; Pisanu, A; Malavasi, L; Deganello, D; Margadonna, S	Designing a High-Power Sodium-Ion Battery by in Situ Metal Plating	ACS APPLIED ENERGY MATERIALS	Sodium-ion batteries represent a drop-in technology and a more sustainable alternative to lithium-ion batteries, but higher energies and power levels are required to meet the demands for a greener electrification. Here, the design of an anode-free sodium-ion battery is presented, and the performance of the battery is discussed in terms of reduced mass and high power capabilities. The cell consist…	Malavasi, Lorenzo/0000-0003-4724-2376; Mazzali, Francesco/0000-0003-4063-7084; Deganello, Davide/0000-0001-8341-4177; Orzech, Marcin/0000-0002-1086-4481	2019	10.1021/acsaem.8b01361
Migliori, M; Catizzone, E; Aloise, A; Bonura, G; Gomez-Hortiguela, L; Frusteri, L; Cannilla, C; Frusteri, F; Giordano, G	New insights about coke deposition in methanol-to-DME reaction over MOR-, MFI- and FER-type zeolites	JOURNAL OF INDUSTRIAL AND ENGINEERING CHEMISTRY	The effect of channel-system of zeolite on methanol-to-DME reaction was studied. Results revealed that channels size and topology affect catalyst lifetime, type and location of coke precursors. FER and MFI showed the best resistance towards coke deposition, whilst fast deactivation was observed on MOR. Although the higher concentration and strength of acid sites, FER structure formed a lower coke…	Bonura, Giuseppe/0000-0001-5793-8903; Giordano, Girolamo/0000-0003-2293-718X; Frusteri, Leone/0000-0002-7657-5391; Catizzone, Enrico/0000-0002-3962-9493; Frusteri, Francesco/0000-0003-4487-8432	2018	10.1016/j.jiec.2018.07.046
Gomez-Laserna, O; Lanzafame, P; Papanikolaou, G; Olazabal, MA; Lo Schiavo, S; Cardiano, P	Analytical assessment to develop innovative nanostructured BPA-free epoxy-silica resins as multifunctional stone conservation materials	SCIENCE OF THE TOTAL ENVIRONMENT	Bisphenol A (BPA)-free epoxy resins, synthesized from low molecular weight cycloaliphatic compounds, may represents promising materials for stone conservation due to their very appealing and tunable physicochemical properties, such as viscosity, curing rate and penetration ability, being also easy to apply and handle. Furthermore, alkoxysilanes have been widely employed as inorganic strengtheners…	Gomez-Laserna, Olivia/0000-0002-2723-3168; CARDIANO, Paola/0000-0002-1380-5380; LANZAFAME, PAOLA/0000-0002-6092-346X; PAPANIKOLAOU, GEORGIA/0000-0001-6295-0106	2018	10.1016/j.scitotenv.2018.07.188
Boldrini, CL; Manfredi, N; Perna, FM; Capriati, V; Abbotto, A	Designing Eco-Sustainable Dye-Sensitized Solar Cells by the Use of a Menthol-Based Hydrophobic Eutectic Solvent as an Effective Electrolyte Medium	CHEMISTRY-A EUROPEAN JOURNAL	The use of a hydrophobic eutectic solvent based on dl-menthol and a naturally occurring acid such as acetic acid has been tested as an eco-friendly electrolyte medium in dye-sensitized solar cells. In the presence of a de-aggregating agent and a representative hydrophobic organic photosensitizer, the corresponding devices displayed relatively good power conversion efficiencies in very thin active…	Perna, Filippo/0000-0002-8735-8165; Capriati, Vito/0000-0003-4883-7128; Manfredi, Norberto/0000-0002-3802-1953; Abbotto, Alessandro/0000-0002-0165-5581	2018	10.1002/chem.201803668
Giorgianni, G; Abate, S; Centi, G; Perathoner, S; van Beuzekom, S; Soo-Tang, SH; Van der Waal, JC	Effect of the Solvent in Enhancing the Selectivity to Furan Derivatives in the Catalytic Hydrogenation of Furfural	ACS SUSTAINABLE CHEMISTRY & ENGINEERING	The catalytic hydrogenation of furfural, particularly to methyl-furan, is studied on four commercial catalysts (based on Ni and Cu and alumina or silica as supports) in different aprotic solvents (n-heptane, diisopropyl ether and ethyl acetate) and two Cl-containing solvents (chlorobenzene and n-heptane containing 0.5 wt % CHCl3). The catalytic data are complemented by the estimated solvent chara…	Perathoner, Siglinda/0000-0001-8814-1972; Centi, Gabriele/0000-0001-5626-9840; Giorgianni, Gianfranco/0000-0002-5305-7727	2018	10.1021/acssuschemeng.8b03101
Carella, A; Centore, R; Borbone, F; Toscanesi, M; Trifuoggi, M; Bella, F; Gerbaldi, C; Galliano, S; Schiavo, E; Massaro, A; Munoz-Garcia, AB; Pavone, M	Tuning optical and electronic properties in novel carbazole photosensitizers for p-type dye-sensitized solar cells	ELECTROCHIMICA ACTA	This work reports the synthesis and characterization of three novel carbazole-based push-pull dyes that have been purposely designed to be applied in p-type dye-sensitized solar cells (DSSCs). By using the same electron-donor moiety (the carbazole group) and three different electron acceptor groups, we explore how these new substituents affect the optical and electrochemical properties of the dye…	Pavone, Michele/0000-0001-7549-631X; Gerbaldi, Claudio/0000-0002-8084-0143; Bella, Federico/0000-0002-2282-9667; Massaro, Arianna/0000-0003-2950-6745; Borbone, Fabio/0000-0001-7433-9267; Schiavo, Eduardo/0000-0002-2237-4308	2018	10.1016/j.electacta.2018.09.204
Nitti, A; Osw, P; Abdullah, MN; Galbiati, A; Pasini, D	Scalable Synthesis of Naphthothiophene-based D-pi-D Extended Oligomers through Cascade Direct Arylation Processes	SYNLETT	The synthesis of two novel. pi-extended oligomers, incorporating naphtho[1,2-b] thiophene-4-carboxylate 2-octyldodecyl esters as end-capping moieties, and two different conjugated core fragments, has been achieved through a cascade sequence of sustainable organic reactions. Benzo[c][1,2,5]thiadiazole and 2-octyldodecyl benzo[1,2b: 6,5-b'] dithiophene-4-carboxylate have been used, respectively, as…	Osw, Peshawa/0000-0002-0942-3187; Nitti, Andrea/0000-0002-7232-5707; Pasini, Dario/0000-0002-8273-3798	2018	10.1055/s-0037-1610331
Pizzolitto, C; Menegazzo, F; Ghedini, E; Innocenti, G; Di Michele, A; Cruciani, G; Cavani, F; Signoretto, M	Increase of Ceria Redox Ability by Lanthanum Addition on Ni Based Catalysts for Hydrogen Production	ACS SUSTAINABLE CHEMISTRY & ENGINEERING	The effects of lanthanum addition in Ni/CeO2 catalysts were investigated. The influence of synthetic procedures, namely, impregnation or coprecipitation of lanthanum and cerium oxide, were evaluated. Materials were analyzed by BET, AAS, DRIFT-MS, TPR, OSC, XRD, and SEM-EDX. Samples were tested in ethanol steam reforming (ESR). Both lanthanum promoted samples exhibited a higher stability in time t…	Innocenti, Giada/0000-0003-2951-5457; Di Michele, Alessandro/0000-0002-0357-2608; CAVANI, FABRIZIO/0000-0002-4282-6260; Cruciani, Giuseppe/0000-0002-4269-697X; Menegazzo, Federica/0000-0001-8023-6379	2018	10.1021/acssuschemeng.8b02103
Dengo, N; De Fazio, AF; Weiss, M; Marschall, R; Dolcet, P; Fanetti, M; Gross, S	Thermal Evolution of ZnS Nanostructures: Effect of Oxidation Phenomena on Structural Features and Photocatalytical Performances	INORGANIC CHEMISTRY	ZnS nanosystems are being extensively studied for their possible use in a wide range of technological applications. Recently, the gradual oxidation of ZnS to ZnO was exploited to tune their structural, electronic, and functional properties. However, the inherent complexity and size dependence of the ZnS oxidation phenomena resulted in a very fragmented description of the process. In this work, di…	Marschall, Roland/0000-0002-1057-0459; Dengo, Nicola/0000-0003-2534-7265; Fanetti, Mattia/0000-0002-2437-5179; De Fazio, Angela Federica/0000-0002-9733-3981; Gross, Silvia/0000-0003-1860-8711; Dolcet, Paolo/0000-0001-9583-9375	2018	10.1021/acs.inorgchem.8b01101
Sarasini, F; Luzi, F; Dominici, F; Maffei, G; Iannone, A; Zuorro, A; Lavecchia, R; Torre, L; Carbonell-Verdu, A; Balart, R; Puglia, D	Effect of Different Compatibilizers on Sustainable Composites Based on a PHBV/PBAT Matrix Filled with Coffee Silverskin	POLYMERS	This work investigates the feasibility of using coffee silverskin (CSS), one of the most abundant coffee waste products, as a reinforcing agent in biopolymer-based composites. The effect of using two compatibilizers, a maleinized linseed oil (MLO) and a traditional silane (APTES, (3-aminopropyl)triethoxysilane), on mechanical and thermal behavior of sustainable composites based on a poly(butylene…	Puglia, Debora/0000-0001-8515-7813; Zuorro, Antonio/0000-0002-8173-3809; MAFFEI, GIANLUCA/0000-0003-4766-0084; Balart, Rafael/0000-0001-5670-7126; Dominici, Franco/0000-0003-4861-7520	2018	10.3390/polym10111256
Bilo, F; Pandini, S; Sartore, L; Depero, LE; Gargiulo, G; Bonassi, A; Federici, S; Bontempi, E	A sustainable bioplastic obtained from rice straw	JOURNAL OF CLEANER PRODUCTION	A new bioplastic was produced from rice straw, an agricultural waste that generally is not recovered. For the synthesis the sample was treated by using the Naviglio extractor, then it was dissolved by trifluoroacetic acid. The material exhibits good mechanical properties, with tensile strength and elongation at break equal to 45 MPa and 6.1% and 10 MPa and 63% for dried and wet dumbbells, respect…	FEDERICI, Stefania/0000-0001-7118-8766; Sartore, Luciana/0000-0003-0268-6467; Bontempi, Elza/0000-0003-1656-7506; GARGIULO, GIOVANNA/0000-0002-3172-4437; Depero, Laura Eleonora/0000-0001-7818-3212; Bilo, Fabjola/0000-0001-7362-3258	2018	10.1016/j.jclepro.2018.07.252
Belli, A; Mobili, A; Bellezze, T; Tittarelli, F; Cachim, P	Evaluating the Self-Sensing Ability of Cement Mortars Manufactured with Graphene Nanoplatelets, Virgin or Recycled Carbon Fibers through Piezoresistivity Tests	SUSTAINABILITY	This paper presents the resistivity and piezoresistivity behavior of cement-based mortars manufactured with graphene nanoplatelet filler (GNP), virgin carbon fibers (VCF) and recycled carbon fibers (RCF). GNP was added at 4% of the cement weight, whereas two percentages of carbon fibers were chosen, namely 0.05% and 0.2% of the total volume. The combined effect of both filler and fibers was also …	Mobili, Alessandra/0000-0002-0891-5649; Tittarelli, Francesca/0000-0001-5805-6822; Belli, Alberto/0000-0002-9399-0810; Cachim, Paulo/0000-0002-0556-1056	2018	10.3390/su10114013
Perissi, I; Falsini, S; Bardi, U; Natalini, D; Green, M; Jones, A; Sole, J	Potential European Emissions Trajectories within the Global Carbon Budget	SUSTAINABILITY	The Paris Agreement, ratified in 2015, pledged to reduce greenhouse gas emissions within a Global Carbon Budget that limits the global temperature increase to less than 2 degrees C. With the Roadmap 2050 mitigation measures, the European Union has a target to reduce emissions by 80% of their 1990 value by 2050 but without giving an estimation or a maximum ceiling for the total amount of cumulativ…	Sara, Falsini/0000-0003-2953-4025; Perissi, Ilaria/0000-0001-8996-2748; Bardi, Ugo/0000-0003-2240-2070; Jones, Aled/0000-0001-7823-9116; Sole, Jordi/0000-0002-2371-1652; Natalini, Davide/0000-0001-6975-5522	2018	10.3390/su10114225
Tripodi, A; Compagnoni, M; Bahadori, E; Rossetti, I; Ramis, G	Process Intensification by Exploiting Diluted 2nd Generation Bio-ethanol in the Low-Temperature Steam Reforming Process	TOPICS IN CATALYSIS	Second generation bioethanol, obtained by the fermentation of lignocellulosic biomass, which is not competitive with the food and feed field, is one of the most interesting promising biofuels, already available in semi-commercial amount. Steam reforming of bioethanol has been used here for sustainable hydrogen and syngas production. Differently purified second generation bioethanol feeds, directl…		2018	10.1007/s11244-018-1002-6
Menegazzo, F; Manzoli, M; di Michele, A; Ghedini, E; Signoretto, M	Supported Gold Nanoparticles for Furfural Valorization in the Future Bio-based Industry	TOPICS IN CATALYSIS	Gold nanoparticles prepared by sol immobilization using PVA as protecting agent were supported over different oxides (CeO2, ZrO2 and TiO2). The activity of the gold catalysts was tested in the oxidative esterification of furfural by an efficient and sustainable process. The samples supported on ceria and zirconia (AuCe and AuZr) have shown complete conversion and selectivity under mild reaction c…	Menegazzo, Federica/0000-0001-8023-6379	2018	10.1007/s11244-018-1003-5
Coppola, L; Coffetti, D; Crotti, E; Pastore, T	CSA-based Portland-free binders to manufacture sustainable concretes for jointless slabs on ground	CONSTRUCTION AND BUILDING MATERIALS	The paper is aimed to the evaluation of the influence of water/binder ratio, tartaric acid dosage and curing condition on rheological, elastic and physical properties of sustainable shrinkage-compensating concretes manufactured with calcium sulphoaluminate cement (CSA), anhydrite (CS) and supplementary cementitious materials (SCMs)/lime (CH) compound in place of ordinary Portland cement (OPC). Re…	Coffetti, Denny/0000-0003-1217-4983; COPPOLA, Luigi/0000-0002-6825-3528	2018	10.1016/j.conbuildmat.2018.07.221
Zanoletti, A; Bilo, F; Borgese, L; Depero, LE; Fahimi, A; Ponti, J; Valsesia, A; La Spina, R; Montini, T; Bontempi, E	SUNSPACE, A Porous Material to Reduce Air Particulate Matter (PM)	FRONTIERS IN CHEMISTRY	The World Health Organization reports that every year several million people die prematurely due to air pollution. Poor air quality is a by-product of unsustainable policies in transportation, energy, industry, and waste management in the world's most crowded cities. Particulate matter (PM) is one of the major element of polluted air. PM can be composed by organic and inorganic species. In partic…	Bontempi, Elza/0000-0003-1656-7506; Ponti, Jessica/0000-0002-4961-8405; Bilo, Fabjola/0000-0001-7362-3258; Depero, Laura Eleonora/0000-0001-7818-3212; Zanoletti, Alessandra/0000-0003-0225-7048; MONTINI, Tiziano/0000-0001-9515-566X; FAHIMI, Ario/0000-0002-0974-313X	2018	10.3389/fchem.2018.00534
Malara, A; Paone, E; Frontera, P; Bonaccorsi, L; Panzera, G; Mauriello, F	Sustainable Exploitation of Coffee Silverskin in Water Remediation	SUSTAINABILITY	Coffee silverskin (CS), the main solid waste produced from the coffee industry, has efficiently been used as adsorbent material to remove potential toxic metals (PTMs). In order to assess its suitability in water remediation, kinetic adsorption experiments of Cu2+, Zn2+, and Ni2+ ions from wastewater were carried out and the adsorption performance of the waste material was compared with that of a…	Malara, Angela/0000-0001-8771-8485; Mauriello, Francesco/0000-0002-6002-2151; Frontera, Patrizia/0000-0001-8045-9943; Paone, Emilia/0000-0001-8184-750X	2018	10.3390/su10103547
Pascuzzi, MEC; Selinger, E; Sacco, A; Castellino, M; Rivolo, P; Hernandez, S; Lopinski, G; Tamblyn, I; Nasi, R; Esposito, S; Manzoli, M; Bonelli, B; Armandi, M	Beneficial effect of Fe addition on the catalytic activity of electrodeposited MnOx films in the water oxidation reaction	ELECTROCHIMICA ACTA	We report on a fast and simple protocol for the electrodeposition of Fe-MnOx films used as catalysts for the water oxidation (WO) reaction at neutral pH, and showing the beneficial effect of iron in terms of both activity and stability of the catalyst. While most electrodeposited MnOx WO catalysts are obtained starting from Mn(II) precursors, the proposed protocol consists in the galvanostatic ca…	Hernandez, Simelys/0000-0002-6722-0273; Nasi, Robert/0000-0001-9739-3135; Rivolo, Paola/0000-0003-0672-5793; Sacco, Adriano/0000-0002-9229-2113; Etzi Coller Pascuzzi, Marco/0000-0001-7961-2138; Tamblyn, Isaac/0000-0002-8146-6667	2018	10.1016/j.electacta.2018.07.148
Falsini, S; Bardi, U; Abou-Hassan, A; Ristori, S	Sustainable strategies for large-scale nanotechnology manufacturing in the biomedical field	GREEN CHEMISTRY	Nanoscience is a powerful tool to study matter at the scale where cooperative actions among atomic and molecular assemblies are effective, that is, in the nanometer range. Its application to technology is expected to bring new ways to improve our life by means of applications in fields such as environmental and materials science, pharmacy, and medicine. Given the progress in these areas, it is no…	Sara, Falsini/0000-0003-2953-4025; Bardi, Ugo/0000-0003-2240-2070; Ristori, Sandra/0000-0003-0708-3956; Abou-Hassan, Ali/0000-0002-9070-1024	2018	10.1039/c8gc01248b
Benitez, A; Di Lecce, D; Caballero, A; Morales, J; Rodriguez-Castellon, E; Hassoun, J	Lithium sulfur battery exploiting material design and electrolyte chemistry: 3D graphene framework and diglyme solution	JOURNAL OF POWER SOURCES	Herein we investigate a lithium sulfur battery suitably combining alternative cathode design and relatively safe, highly conductive electrolyte. The composite cathode is formed by infiltrating sulfur in a N-doped 3D graphene framework prepared by a microwave assisted solvothermal approach, while the electrolyte is obtained by dissolving lithium bis(trifluoromethane)sulfonimide (LiTFSI) in diethyl…	DI LECCE, DANIELE/0000-0003-1290-1140; Caballero, Alvaro/0000-0002-2084-0686; Hassoun, Jusef/0000-0002-8218-5680; Benitez de la Torre, Almudena/0000-0001-6083-0223	2018	10.1016/j.jpowsour.2018.07.002
Quina, MJ; Bontempi, E; Bogush, A; Schlumberger, S; Weibel, G; Braga, R; Funari, V; Hyks, J; Rasmussen, E; Lederer, J	Technologies for the management of MSW incineration ashes from gas cleaning: New perspectives on recovery of secondary raw materials and circular economy	SCIENCE OF THE TOTAL ENVIRONMENT	Environmental policies in the European Union focus on the prevention of hazardouswaste and aimtomitigate its impact on human health and ecosystems. However, progress is promoting a shift in perspective from environmental impacts to resource recovery. Municipal solid waste incineration (MSWI) has been increasing in developed countries, thus the amount of air pollution control residues (APCr) and f…	Bontempi, Elza/0000-0003-1656-7506; Braga, Roberto/0000-0001-8210-6658; Quina, Margarida J/0000-0002-9651-2427; Funari, Valerio/0000-0002-8280-8518; Bogush, Anna/0000-0003-2992-6926	2018	10.1016/j.scitotenv.2018.04.150
Scarselli, M; Limosani, F; Passacantando, M; D'Orazio, F; Nardone, M; Cacciotti, I; Arduini, F; Gautron, E; De Crescenzi, M	Influence of Iron Catalyst in the Carbon Spheres Synthesis for Energy and Electrochemical Applications	ADVANCED MATERIALS INTERFACES	Carbon spheres of nanometric dimension are known since the first studies on the synthesis of fullerenes. Their shape originates from the curvature of a carbon sheet similar to fullerenes, but with numerous graphitic rings that regulate the inside structure and the formation of open edges at the surface. This paper focuses on the structural and electronic characterization of carbon spheres obtaine…	Cacciotti, Ilaria/0000-0002-3478-6510; Scarselli, Manuela/0000-0002-5611-0319; D'Orazio, Franco/0000-0002-1907-3125; Limosani, Francesca/0000-0001-6580-864X; De Crescenzi, Maurizio/0000-0002-2935-8714	2018	10.1002/admi.201800070
Iaquaniello, G; Centi, G; Salladini, A; Palo, E; Perathoner, S	Waste to Chemicals for a Circular Economy	CHEMISTRY-A EUROPEAN JOURNAL	The implementation of a circular economy is a fundamental step to create a greater and more sustainable future for a better use of resources and energy. Wastes and in particular municipal solid waste represent an untapped source of carbon (and hydrogen) to produce a large range of chemicals from methane to alcohols (as methanol or ethanol) or urea. The waste to chemical process and related econom…	Centi, Gabriele/0000-0001-5626-9840; Perathoner, Siglinda/0000-0001-8814-1972	2018	10.1002/chem.201802903
Zhang, W; Innocenti, G; Ferbinteanu, M; Ramos-Fernandez, EV; Sepulveda-Escribano, A; Wu, HH; Cavani, F; Rothenberg, G; Shiju, NR	Understanding the oxidative dehydrogenation of ethyl lactate to ethyl pyruvate over vanadia/titania	CATALYSIS SCIENCE & TECHNOLOGY	We studied the vapour-phase oxidative dehydrogenation (ODH) of ethyl lactate with air to give ethyl pyruvate over V2O5/TiO2 catalysts in a fixed-bed reactor. The nature of the vanadia species is changed by varying the vanadium surface density, and the corresponding structure of the VOx species was determined by XRD, UV-vis spectroscopy, XPS and H-2-TPR. Monomeric and isolated vanadia species domi…	Ferbinteanu, Marilena/0000-0002-7019-4635; Ramos-Fernandez, Enrique V./0000-0001-6357-0383; Innocenti, Giada/0000-0003-2951-5457; Zhang, Wei/0000-0003-4506-6583; Ramos-Fernandez, Enrique V./0000-0001-6357-0383; Sepulveda-Escribano, Antonio/0000-0002-0904-0071; Rothenberg, Gadi/0000-0003-1286-4474; CAVANI, FABRIZIO/0000-0002-4282-6260	2018	10.1039/c7cy02309j
He, XY; Luzi, F; Yang, WJ; Xiao, ZF; Torre, L; Xie, YJ; Puglia, D	Citric Acid as Green Modifier for Tuned Hydrophilicity of Surface Modified Cellulose and Lignin Nanoparticles	ACS SUSTAINABLE CHEMISTRY & ENGINEERING	This paper proposes one straightforward route for citric acid modification of two different lignocellulosic products, cellulose nanocrystals (CNC) and lignin nanoparticles (LNP). Modified cellulose nanocrystals (MCNC) and lignin nanoparticles (MLNP) were characterized by means of Fourier Transform Infrared Spectroscopy (FT-IR), C-13 and H-1 nuclear magnetic resonance (NMR), scanning electron micr…	Xie, Yanjun/0000-0002-3077-7983; Puglia, Debora/0000-0001-8515-7813; Luzi, Francesca/0000-0001-8785-5033	2018	10.1021/acssuschemeng.8b01202
Bugaev, AL; Usoltsev, OA; Lazzarini, A; Lomachenko, KA; Guda, AA; Pellegrini, R; Carosso, M; Vitillo, JG; Groppo, E; van Bokhoven, JA; Soldatov, AV; Lamberti, C	Time-resolved operando studies of carbon supported Pd nanoparticles under hydrogenation reactions by X-ray diffraction and absorption	FARADAY DISCUSSIONS	The formation of palladium hydride and carbide phases in palladium-based catalysts is a critical process that changes the catalytic performance and selectivity of the catalysts in important industrial reactions, such as the selective hydrogenation of alkynes or alkadienes. We present a comprehensive study of a 5 wt% carbon supported Pd nanoparticle (NP) catalyst in various environments by using i…	Guda, Alexander A/0000-0002-6941-4987; Usoltsev, Oleg A./0000-0002-1537-3497; Lomachenko, Kirill A/0000-0003-0238-1719; Lamberti, Carlo/0000-0001-8004-2312; Lazzarini, Andrea/0000-0002-0404-6597; Bugaev, Aram L./0000-0001-8273-2560; Soldatov, Alexander V/0000-0001-8411-0546; Vitillo, Jenny G./0000-0002-6213-2039; Soldatov, Alexander/0000-0001-8411-0546; Pellegrini, Riccardo/0000-0001-8989-7616	2018	10.1039/c7fd00211d
Marocco, P; Morosanu, EA; Giglio, E; Ferrero, D; Mebrahtu, C; Lanzini, A; Abate, S; Bensaid, S; Perathoner, S; Santarelli, M; Pirone, R; Centi, G	CO2 methanation over Ni/Al hydrotalcite-derived catalyst: Experimental characterization and kinetic study	FUEL	The catalytic performance of a Ni/Al hydrotalcite derived catalyst for CO2 methanation was analysed under different operating conditions. The as synthesized sample has been characterized through atomic adsorption spectroscopy (AAS) X-ray diffraction (XRD), Brunauer-Emmett-Teller (BET) analysis, temperature programmed reduction (TPR) and CO chemisorption. Experimental investigation was carried out…	Perathoner, Siglinda/0000-0001-8814-1972; Centi, Gabriele/0000-0001-5626-9840; Morosanu, Eduard Alexandru/0000-0002-1613-5992; Mebrahtu, Chalachew/0000-0001-6122-0937; GIGLIO, EMANUELE/0000-0003-0480-0905; FERRERO, DOMENICO/0000-0002-4802-0583; Lanzini, Andrea/0000-0003-4688-8212; BENSAID, Samir/0000-0001-9634-266X	2018	10.1016/j.fuel.2018.03.137
Fabbiani, M; Pazzi, M; Vincenti, M; Tabacchi, G; Fois, E; Martra, G	Does the Abiotic Formation of Oligopeptides on TiO2 Nanoparticles Require Special Catalytic Sites? Apparently Not	JOURNAL OF NANOSCIENCE AND NANOTECHNOLOGY	The oligomerization of non-activated amino acids catalyzed by nanostrucrured mineral oxide surfaces holds promises as a sustainable route for the industrial production of polypeptides. To analyze the influence of the surface type on the catalytic process, we performed, via a mild Chemical Vapor Deposition approach, the oligomerization of Glycine on two samples of TiO2 nanoparticles characterized …	tabacchi, gloria/0000-0002-1988-6775; Fabbiani, Marco/0000-0002-9094-0279; Pazzi, Marco/0000-0002-9763-8785; Vincenti, Marco/0000-0002-6275-7194; Fabbiani, Marco/0000-0002-9094-0279	2018	10.1166/jnn.2018.15385
Christoforidis, KC; Syrgiannis, Z; La Parola, V; Montini, T; Petit, C; Stathatos, E; Godin, R; Durrant, JR; Prato, M; Fornasiero, P	Metal-free dual-phase full organic carbon nanotubes/g-C3N4 heteroarchitectures for photocatalytic hydrogen production	NANO ENERGY	Hydrogen generation from water using solar energy has grown into a promising approach for sustainable energy production. Over the last years, graphitic carbon nitrides (g-C3N4, CN), polymers based on the heptazine-group, have been widely applied as photocatalysts for H-2 evolution. The poor charge separation efficiency of CN is considered the major drawback. Here, we investigated the effect of co…	Syrgiannis, Zois/0000-0003-0345-182X; Petit, Camille/0000-0002-3722-7984; La Parola, Valeria/0000-0001-7695-6031; Christoforidis, Konstantinos C./0000-0002-3941-0299; Fornasiero, Paolo/0000-0003-1082-9157; Godin, Robert/0000-0001-7945-8548; Durrant, James R/0000-0001-8353-7345; Syrgiannis, Zois/0000-0003-0345-182X; Fornasiero, Paolo/0000-0003-1082-9157; La Parola, Valeria/0000-0001-7695-6031; Pra…	2018	10.1016/j.nanoen.2018.05.070
Zanoletti, A; Bilo, F; Depero, LE; Zappa, D; Bontempi, E	The first sustainable material designed for air particulate matter capture: An introduction to Azure Chemistry	JOURNAL OF ENVIRONMENTAL MANAGEMENT	This work presents a new porous material (SUNSPACE) designed for air particulate matter (PM) capture. It was developed in answer to the European Commission request of an innovative, affordable, and sustainable solution, based on design-driven material, to reduce the concentration of air particulate matter in urban areas. SUNSPACE material was developed from by-products and low-cost materials, suc…	Bontempi, Elza/0000-0003-1656-7506; Zappa, Dario/0000-0001-9838-7511; Zanoletti, Alessandra/0000-0003-0225-7048; Depero, Laura Eleonora/0000-0001-7818-3212; Bilo, Fabjola/0000-0001-7362-3258	2018	10.1016/j.jenvman.2018.04.081
Melchionna, M; Beltram, A; Stopin, A; Montini, T; Lodge, RW; Khlobystov, AN; Bonifazi, D; Prato, M; Fornasiero, P	Magnetic shepherding of nanocatalysts through hierarchically-assembled Fe-filled CNTs hybrids	APPLIED CATALYSIS B-ENVIRONMENTAL	Mechanically robust, chemically stable and electronically active carbon nanotubes (CNTs) are widely used as supports in catalysis. Synergistic effects between CNT and the active phase critically depend on the homogeneity of the carbon/inorganic interface, whose assembly is difficult to achieve without admixtures of free-standing inorganic matrix. Here we show that Fe-filled CNTs, employed as nano…	Fornasiero, Paolo/0000-0003-1082-9157; Melchionna, Michele/0000-0001-9813-9753; Fornasiero, Paolo/0000-0003-1082-9157; Lodge, Rhys/0000-0002-1462-5971; MONTINI, Tiziano/0000-0001-9515-566X; Stopin, Antoine/0000-0002-0833-8116; Prato, Maurizio/0000-0002-8869-8612	2018	10.1016/j.apcatb.2018.01.049
Pasquali, M; Zanoletti, A; Benassi, L; Federici, S; Depero, LE; Bontempi, E	Stabilized biomass ash as a sustainable substitute for commercial P-fertilizers	LAND DEGRADATION & DEVELOPMENT	The reuse of biomass ash as a fertilizer is generally recognized as good practice with several environmental benefits. However, the possible presence of leachable heavy metals in this ash limits the potential extent of its application and the implementation of an appropriate legal framework. For the first time, a method to stabilize wood ash based on the use of other by-products (coal fly ash and…	Bontempi, Elza/0000-0003-1656-7506; FEDERICI, Stefania/0000-0001-7118-8766; Depero, Laura Eleonora/0000-0001-7818-3212; Zanoletti, Alessandra/0000-0003-0225-7048	2018	10.1002/ldr.2915
Mochi, F; Burratti, L; Fratoddi, I; Venditti, I; Battocchio, C; Carlini, L; Iucci, G; Casalboni, M; de Matteis, F; Casciardi, S; Nappini, S; Pis, I; Prosposito, P	Plasmonic Sensor Based on Interaction between Silver Nanoparticles and Ni2+ or Co2+ in Water	NANOMATERIALS	Silver nanoparticles capped with 3-mercapto-1propanesulfonic acid sodium salt (AgNPs-3MPS), able to interact with Ni2+ or Co2+, have been prepared to detect these heavy metal ions in water. This system works as an optical sensor and it is based on the change of the intensity and shape of optical absorption peak due to the surface plasmon resonance (SPR) when the AgNPs-3MPS are in presence of meta…	Venditti, Iole/0000-0002-9306-573X; Nappini, Silvia/0000-0002-4944-5487; De Matteis, Fabio/0000-0001-7860-9754; Burratti, Luca/0000-0003-1515-3264; Carlini, Laura/0000-0001-9448-017X	2018	10.3390/nano8070488
Cabrini, M; Calignano, F; Fino, P; Lorenzi, S; Lorusso, M; Manfredi, D; Testa, C; Pastore, T	Corrosion Behavior of Heat-Treated AlSi10Mg Manufactured by Laser Powder Bed Fusion	MATERIALS	This experimental work is aimed at studying the effect of microstructural modifications induced by post-processing heat treatments on the corrosion behavior of silicon-aluminum alloys produced by means of laser powder bed fusion (LPBF). The manufacturing technique leads to microstructures characterized by the presence of melt pools, which are quite different compared to casting alloys. In this st…	Lorusso, Massimo/0000-0002-9397-0676; Cabrini, Marina/0000-0003-3901-8657; Lorenzi, Sergio/0000-0002-1337-7590; Pastore, Tommaso/0000-0002-1443-7786; Testa, Cristian/0000-0002-6064-9851; Manfredi, Diego/0000-0002-2876-143X	2018	10.3390/ma11071051
Corsi, I; Winther-Nielsen, M; Sethi, R; Punta, C; Della Torre, C; Libralato, G; Lofrano, G; Sabatini, L; Aiello, M; Fiordi, L; Cinuzzi, F; Caneschi, A; Pellegrini, D; Buttino, I	Ecofriendly nanotechnologies and nanomaterials for environmental applications: Key issue and consensus recommendations for sustainable and ecosafe nanoremediation	ECOTOXICOLOGY AND ENVIRONMENTAL SAFETY	The use of engineered nanomaterials (ENMs) for environmental remediation, known as nanoremediation, represents a challenging and innovative solution, ensuring a quick and efficient removal of pollutants from contaminated sites. Although the growing interest in nanotechnological solutions for pollution remediation, with significant economic investment worldwide, environmental and human risk assess…	corsi, ilaria/0000-0002-1811-3041; Corsi, Ilaria/0000-0002-1811-3041; Punta, CARLO/0000-0002-7239-9554; Milanesi, Alessio/0000-0001-9103-3497; LOFRANO, Giusy/0000-0001-8531-249X	2018	10.1016/j.ecoenv.2018.02.037
Coppola, L; Coffetti, D; Crotti, E	Pre-packed alkali activated cement-free mortars for repair of existing masonry buildings and concrete structures	CONSTRUCTION AND BUILDING MATERIALS	This paper is aimed to study a ground granulated blast furnace slag activated with alkali powder to manufacture Portland-free mortars for conservation, restoration and retrofitting of existing masonry buildings and concrete structures. Activator/precursor represents the key parameter - not only for elasto-mechanical performances - influencing the rheological properties and the shrinkage: the high…	Coffetti, Denny/0000-0003-1217-4983	2018	10.1016/j.conbuildmat.2018.04.034
Bugaev, AL; Usoltsev, OA; Guda, AA; Lomachenko, KA; Pankin, IA; Rusalev, YV; Emerich, H; Groppo, E; Pellegrini, R; Soldatov, AV; van Bokhoven, JA; Lamberti, C	Palladium Carbide and Hydride Formation in the Bulk and at the Surface of Palladium Nanoparticles	JOURNAL OF PHYSICAL CHEMISTRY C	The presence of a core/shell behavior in Pd nano particles (NPs) during the formation of the metal-hydride phase has recently been highlighted combining X-ray absorption and scattering experiments [J. Phys. Chem. C 2017, 121, 18202]. In this work, we focus on the formation of the carbide phase in the bulk region and on the surface of supported palladium NPs because it affects the catalytic activi…	Pankin, Ilia Andreevich/0000-0003-2784-4839; Soldatov, Alexander/0000-0001-8411-0546; Lomachenko, Kirill A/0000-0003-0238-1719; Lamberti, Carlo/0000-0001-8004-2312; Bugaev, Aram L./0000-0001-8273-2560; Usoltsev, Oleg A./0000-0002-1537-3497; Guda, Alexander A/0000-0002-6941-4987; Soldatov, Alexander V/0000-0001-8411-0546; Pellegrini, Riccardo/0000-0001-8989-7616; Rusalev, Yury/0000-0002-6507-6298	2018	10.1021/acs.jpcc.7b11473
Gagliano, A; Nocera, F; Bruno, M; Blanco, I	Effectiveness of thermodynamic adaptative equilibrium models for modeling the pyrolysis process	SUSTAINABLE ENERGY TECHNOLOGIES AND ASSESSMENTS	The pyrolysis process of biomass is one of the innovative actions for delivering sustainable energies. The research carried out introduces two thermodynamic equilibrium models (TEMs), called PyRO_2 and PyRO_3, developed for simulating pyrolysis process of biomass. This study typology constitutes tricky task since it involves a large number of physical and chemical transformations and produces sev…	Blanco, Ignazio/0000-0001-9252-9435; Gagliano, Antonio/0000-0002-0462-7586; Nocera, Francesco/0000-0001-5673-5418	2018	10.1016/j.seta.2018.03.006
Cataldi, A; Rigotti, D; Nguyen, VDH; Pegoretti, A	Polyvinyl alcohol reinforced with crystalline nanocellulose for 3D printing application	MATERIALS TODAY COMMUNICATIONS	The aim of this work is to produce fully biodegradable nanocomposite filaments with improved thermo-mechanical properties, to be used in fused deposition modeling (FDM) 3D printing process. At this aim, nano-composites consisting of poly(vinyl alcohol) (PVOH) containing various amounts (from 2 to 20 wt%) of cellulose nanocrystals (CNC) were produced by solution mixing, grinded and extruded into f…	Nguyen, Huy Vu Duc/0000-0002-5086-649X	2018	10.1016/j.mtcomm.2018.02.007
Rovera, C; Ghaani, M; Santo, N; Trabattoni, S; Olsson, RT; Romano, D; Farris, S	Enzymatic Hydrolysis in the Green Production of Bacterial Cellulose Nanocrystals	ACS SUSTAINABLE CHEMISTRY & ENGINEERING	In this study, we extensively describe experimental models, with correlating experimental conditions, which were used to investigate the enzymatic hydrolysis of bacterial cellulose (BC) to obtain nanocrystals. Cellulase from Trichoderma reesei was used in five enzyme/BC ratios over a period of 74 h. The turbidity data was modeled using both logistic regression and empirical regression to determin…	GHAANI, MASOUD/0000-0001-7359-4522; Olsson, Richard/0000-0001-5454-3316; ROMANO, DIEGO/0000-0002-2448-1692; Farris, Stefano/0000-0002-6423-8443	2018	10.1021/acssuschemeng.8b00600
Kosmala, T; Mosconi, D; Giallongo, G; Rizzi, GA; Granozzi, G	Highly Efficient MoS2/Ag2S/Ag Photoelectrocatalyst Obtained from a Recycled DVD Surface	ACS SUSTAINABLE CHEMISTRY & ENGINEERING	An efficient photoelectrocatalyst for hydrogen evolution reaction (HER) was prepared by electrochemical deposition of MoS2 on the Ag nanostructured surface of a commercial writable digital versatile disc (DVD). The deposition was performed by reduction of MoS42- ions and the concomitant production of HS- ions led to the formation of Ag2S nanoparticles. The result was a composite material MoS2/Ag2…	Granozzi, Gaetano/0000-0002-9509-6142; Kosmala, Tomasz/0000-0002-0026-8205; Mosconi, Dario/0000-0002-5763-8617; Rizzi, Gian Andrea/0000-0001-5201-8104	2018	10.1021/acssuschemeng.8b00840
Dolcet, P; Diodati, S; Zorzi, F; Voepel, P; Seitz, C; Smarsly, BM; Mascotto, S; Nestola, F; Gross, S	Very fast crystallisation of MFe2O4 spinet ferrites (M = Co, Mn, Ni, Zn) under low temperature hydro-thermal conditions: a time-resolved structural investigation	GREEN CHEMISTRY	MFe2O4 spinet ferrites (M = Co, Mn, Ni, Zn) were synthesised through a low-temperature aqueous route combining co-precipitation of oxalates and hydrothermal treatment at 135 degrees C. With the objective of gaining a deeper understanding of the structural evolution of the compounds to crystalline materials during the synthetic process, samples were prepared within different reaction times, showin…	Diodati, Stefano/0000-0002-3005-1365; Voepel, Pascal/0000-0001-8233-7261; Seitz, Christoph/0000-0002-8151-9933; Nestola, Fabrizio/0000-0002-4875-5125; Dolcet, Paolo/0000-0001-9583-9375; Gross, Silvia/0000-0003-1860-8711; Smarsly, Bernd/0000-0001-8452-2663	2018	10.1039/c8gc00086g
Coppola, L; Coffetti, D; Crotti, E	Use of tartaric acid for the production of sustainable Portland-free CSA-based mortars	CONSTRUCTION AND BUILDING MATERIALS	The purpose of the study is to evaluate the effect of a tartaric acid-based set retarding admixture on rheological, elastic and physical performances of sustainable mortars manufactured with calcium sulfoaluminate, anhydrite and Supplementary Cementitious Materials replacing totally OPC. Experimental results indicated that the tartaric acid acts as superplasticizer and it is effective to extend t…	Coffetti, Denny/0000-0003-1217-4983	2018	10.1016/j.conbuildmat.2018.03.137
de Brito, JF; Tavella, F; Genovese, C; Ampelli, C; Zanoni, MVB; Centi, G; Perathoner, S	Role of CuO in the modification of the photocatalytic water splitting behavior of TiO2 nanotube thin films	APPLIED CATALYSIS B-ENVIRONMENTAL	The role of CuO nanoparticles decorating TiO2 nanotubes (TNT) thin film photoanodes in the behavior of photo-electrocatalytic (PEC) cells for water splitting reaction is investigated. CuO is present mainly as small nano particles of few nanometer decorating the internal walls of the TiO2 nanotubes. Their presence improves i) the photocurrent behavior, ii) the H-2 generation rate by water splittin…	Ampelli, Claudio/0000-0001-7048-976X; ZANONI, MARIA VALNICE BOLDRIN/0000-0002-2296-1393; GENOVESE, Chiara/0000-0002-4939-2442; de Brito, Juliana F/0000-0002-6014-7739; zanoni, maria valnice boldrin/0000-0002-2296-1393; Perathoner, Siglinda/0000-0001-8814-1972; Centi, Gabriele/0000-0001-5626-9840	2018	10.1016/j.apcatb.2017.09.071
Saboo, T; Tavella, F; Ampelli, C; Perathoner, S; Genovese, C; Marepally, BC; Veyre, L; Quadrelli, EA; Centi, G	Water splitting on 3D-type meso/macro porous structured photoanodes based on Ti mesh	SOLAR ENERGY MATERIALS AND SOLAR CELLS	The behaviour of photoanodes based on TiO2 nanotubes (TNTs) grown on Ti gauze (80 mesh) by controlled anodic oxidation was studied in a compact photo-electrocatalytic (PECa) device for H-2 production by water photo-electrolysis. The 3D-type structured TNTs-Ti meshes evidenced: i) a mesoporosity due to the presence of highly ordered TiO2 nanotube arrays grown on the round surface of the regularly …	GENOVESE, Chiara/0000-0002-4939-2442; Centi, Gabriele/0000-0001-5626-9840; Perathoner, Siglinda/0000-0001-8814-1972; Ampelli, Claudio/0000-0001-7048-976X; MAREPALLY, BHANU CHANDRA/0000-0001-5836-856X	2018	10.1016/j.solmat.2018.01.007
Barreca, D; Bigiani, L; Monai, M; Carraro, G; Gasparotto, A; Sada, C; Marti-Sanchez, S; Grau-Carbonell, A; Arbiol, J; Maccato, C; Fornasiero, P	Supported Mn3O4 Nanosystems for Hydrogen Production through Ethanol Photoreforming	LANGMUIR	Photoreforming promoted by metal oxide nanophoto-catalysts is an attractive route for clean and sustainable hydrogen generation. In the present work, we propose for the first time the use of supported Mn3O4 nanosystems, both pure and functionalized with Au nanoparticles (NPs), for hydrogen generation by photoreforming. The target oxide systems, prepared by chemical vapor deposition (CVD) and deco…	Maccato, Chiara/0000-0001-6368-5754; Arbiol, Jordi/0000-0002-0695-1726; Fornasiero, Paolo/0000-0003-1082-9157; Fornasiero, Paolo/0000-0003-1082-9157; Monai, Matteo/0000-0001-6945-4391; Barreca, Davide/0000-0002-8779-3386; Marti-Sanchez, Sara/0000-0003-4283-1489; Gasparotto, Alberto/0000-0003-4626-651X; Grau-Carbonell, Albert/0000-0002-8901-389X	2018	10.1021/acs.langmuir.8b00642
Mebrahtu, C; Abate, S; Perathoner, S; Chen, SM; Centi, G	CO2 methanation over Ni catalysts based on ternary and quaternary mixed oxide: A comparison and analysis of the structure-activity relationships	CATALYSIS TODAY	Methanation of CO2 was studied in a high throughput reactor (Amtech SPIDER 16) over Ni catalysts supported on ternary and quaternary alumina-zirconia-titania-ceria mixed oxides, in order to compare them under industrial relevant conditions and derive indications about the structure-activity relationships and specifically the role of ceria. The samples were characterized by BET, XRD, H-2-TPR, CO-c…	Perathoner, Siglinda/0000-0001-8814-1972; ABATE, salvatore/0000-0001-6935-7372; Centi, Gabriele/0000-0001-5626-9840; Mebrahtu, Chalachew/0000-0001-6122-0937	2018	10.1016/j.cattod.2017.08.060
Tavella, F; Ampelli, C; Frusteri, L; Frusteri, F; Perathoner, S; Centi, G	Development of photoanodes for photoelectrocatalytic solar cells based on copper-based nanoparticles on titania thin films of vertically aligned nanotubes	CATALYSIS TODAY	Titania nanotube (TNT)-array thin films well decorated by copper nanoparticles with average size of 3 nm were prepared by spray coating of a solution containing size-controlled Cu-0 nanoparticles. The consecutive calcination at 300 degrees C and 450 degrees C leads to the oxidation of these Cu NPs to CuO, with small amounts of Cu2O at the lower calcination temperature, but maintaining the high di…	Ampelli, Claudio/0000-0001-7048-976X; Centi, Gabriele/0000-0001-5626-9840; Perathoner, Siglinda/0000-0001-8814-1972; Frusteri, Leone/0000-0002-7657-5391	2018	10.1016/j.cattod.2017.08.036
Moretti, E; Rodriguez-Aguado, E; Infantes-Molina, A; Rodriguez-Castellon, E; Talon, A; Storaro, L	Sustainable photo-assisted CO oxidation in H-2-rich stream by simulated solar light response of Au nanoparticles supported on TiO2	CATALYSIS TODAY	In this study the photo-response behaviour of Au/TiO2 systems in the preferential CO oxidation in a H-2-rich stream (CO-PROX) was investigated by the first time under simulated solar light irradiation at room temperature and atmospheric pressure. Au nanoparticles, with an average size of 2-5 nm, were precipitated-deposited on a mesoporous TiO2, previously synthesized by sol-gel type procedure and…	Rodriguez-Aguado, Elena/0000-0002-9888-5964	2018	10.1016/j.cattod.2017.09.048
Tripodi, A; Bahadori, E; Cespi, D; Passarini, F; Cavani, F; Tabanelli, T; Rossetti, I	Acetonitrile from Bioethanol Ammoxidation: Process Design from the Grass-Roots and Life Cycle Analysis	ACS SUSTAINABLE CHEMISTRY & ENGINEERING	The growing interest for new routes to obtain acetonitrile led to the development of catalysts active toward the ammoxidation of various substrates. Among these, a C2 molecule such as ethanol represents a good choice in terms of atom economy and, being renewable, sets the basis for a long-term sustainable process. This paper describes a fully integrated, newly designed process for the production …	Passarini, Fabrizio/0000-0002-9870-9258; Tabanelli, Tommaso/0000-0003-0616-8990; Rossetti, Ilenia/0000-0001-5882-5011	2018	10.1021/acssuschemeng.8b00215
Ortelli, S; Malucelli, G; Cuttica, F; Blosi, M; Zanoni, I; Costa, AL	Coatings made of proteins adsorbed on TiO2 nanoparticles: a new flame retardant approach for cotton fabrics	CELLULOSE	A novel durable intumescent flame retardant coating, based on metal oxide nanoparticles (NPs) and biomacromolecules, was designed and applied on cotton fabrics. Specifically, different TiO2 NPs/proteins systems were deposited by dip-pad-dry-cure process and the morphology of the resulting coating were assessed by SEM analysis. Enhancement of durability (i.e. resistance to washing treatments) was …	Ortelli, Simona/0000-0002-0868-3315; Malucelli, Giulio/0000-0002-0459-7698; Costa, Anna Luisa/0000-0003-1407-6498; ZANONI, ILARIA/0000-0001-8692-3460	2018	10.1007/s10570-018-1745-z
Tripodi, A; Pizzonia, A; Bahadori, E; Rossetti, I	Integrated Plant Layout for Heat and Power Cogeneration from Diluted Bioethanol	ACS SUSTAINABLE CHEMISTRY & ENGINEERING	A newly developed kinetic model for the steam reforming of bioethanol has been used to simulate a fully integrated bioethanol-to-power plant. The detailed geometrical model of a tube-bundle reformer has been designed, allowing for a reliable rescaling from a molar-scale hydrogen yield to the selected target of 0.45-0.50 kg/h. This hydrogen output is suitable to grant electrical (up to 5 kW) and t…	Rossetti, Ilenia/0000-0001-5882-5011	2018	10.1021/acssuschemeng.8b00144
Vaghi, L; Sanzone, A; Sassi, M; Pagani, S; Papagni, A; Beverina, L	Synthesis of Fluorinated Acridines via Sequential Micellar Buchwald-Hartwig Amination/Cyclization of Aryl Bromides	SYNTHESIS-STUTTGART	Fluorinated unsymmetrical acridines are efficiently prepared by means of a tandem micellar Buchwald-Hartwig amination followed by an acid-promoted cyclization. The overall process is advantageous with respect to previously described protocols both in terms of efficiency and sustainability. The role of the cosolvent in the amination step is highlighted, demonstrating that rather than resorting to …		2018	10.1055/s-0036-1591937
Chieruzzi, M; Miliozzi, A; Crescenzi, T; Kenny, JM; Torre, L	Synthesis and Characterization of Nanofluids Useful in Concentrated Solar Power Plants Produced by New Mixing Methodologies for Large-Scale Production	JOURNAL OF HEAT TRANSFER-TRANSACTIONS OF THE ASME	In this study, different nanofluids (NFs) were developed by mixing a molten salt mixture (60% NaNO3-40% KNO3) with 1.0 wt% of silica-alumina nanoparticles using different methods. These NFs can be used as thermal energy storage materials in concentrating solar plants with a reduction of storage material if the thermal properties of the base fluid are increased. New mixing procedures without sonic…	KENNY, JOSE/0000-0001-6329-3048	2018	10.1115/1.4038415
Tripodi, A; Manzini, D; Compagnoni, M; Ramis, G; Rossetti, I	Alternative integrated distillation strategies for the purification of acetonitrile from ethanol ammoxidation	JOURNAL OF INDUSTRIAL AND ENGINEERING CHEMISTRY	The feasibility and performance of different strategies to purify a complex mixture of H2O/CH3CN/NH3/HCN from bioethanol ammoxidation are compared. Dichloromethane as entrainer is taken as a base case and compared with more sustainable molecules, such as ethyl acetate (EA), ethylene glycol (EG) and glycerol (G). The thermodynamic behavior of the homogeneous or heterogeneous mixtures is first disc…	Rossetti, Ilenia/0000-0001-5882-5011	2018	10.1016/j.jiec.2017.10.003
Zanoletti, A; Vassura, I; Venturini, E; Monai, M; Montini, T; Federici, S; Zacco, A; Treccani, L; Bontempi, E	A New Porous Hybrid Material Derived From Silica Fume and Alginate for Sustainable Pollutants Reduction	FRONTIERS IN CHEMISTRY	In this work a new mesoporous adsorbent material obtained from a natural, high abundant raw material and a high volume industrial by-product is presented. The material is consolidated by the gelling properties of alginate and by decomposition of sodium-bicarbonate controlled porosity at low temperatures (70-80 degrees C) at different scale lengths. The structural, thermal, and morphological chara…	Monai, Matteo/0000-0001-6945-4391; FEDERICI, Stefania/0000-0001-7118-8766; Bontempi, Elza/0000-0003-1656-7506; Venturini, Elisa/0000-0002-4387-7254; Zanoletti, Alessandra/0000-0003-0225-7048; ZACCO, Annalisa/0000-0001-6572-8981; Vassura, Ivano/0000-0002-0877-9405; MONTINI, Tiziano/0000-0001-9515-566X	2018	10.3389/fchem.2018.00060
Galliano, S; Bella, F; Piana, G; Giacona, G; Viscardi, G; Gerbaldi, C; Gratzel, M; Barolo, C	Finely tuning electrolytes and photoanodes in aqueous solar cells by experimental design	SOLAR ENERGY	If opportunely developed and optimized, aqueous dye-sensitized solar cells can be considered a truly low impact photovoltaic device, with no toxic components. Here we report the use of design of experiments as a useful chemometric technique for the concurrent investigation of a series of experimental factors that directly influence the proper operation of these photoelectrochemical cells. Results…	Gerbaldi, Claudio/0000-0002-8084-0143; Bella, Federico/0000-0002-2282-9667; Nazeeruddin, Mohammad K/0000-0001-5955-4786; Barolo, Claudia/0000-0003-0627-2579	2018	10.1016/j.solener.2018.02.009
Zhang, W; Innocenti, G; Oulego, P; Gitis, V; Wu, HH; Ensing, B; Cavani, F; Rothenberg, G; Shiju, NR	Highly Selective Oxidation of Ethyl Lactate to Ethyl Pyruvate Catalyzed by Mesoporous Vanadia-Titania	ACS CATALYSIS	The direct oxidative dehydrogenation of lactates with molecular oxygen is a greener alternative for producing pyruvates. Here we report a one-pot synthesis of mesoporous vanadia-titania (VTN), acting as highly efficient and recyclable catalysts for the conversion of ethyl lactate to ethyl pyruvate. These VTN materials feature high surface areas, large pore volumes, and high densities of isolated …	Zhang, Wei/0000-0003-4506-6583; Innocenti, Giada/0000-0003-2951-5457; Ensing, Bernd/0000-0002-4913-3571; Oulego, Paula/0000-0002-3829-8960; Gitis, Vitaly/0000-0002-2813-5666	2018	10.1021/acscatal.7b03843
Yang, WJ; Fortunati, E; Gao, DQ; Balestra, GM; Giovanale, G; He, XY; Torre, L; Kenny, JM; Puglia, D	Valorization of Acid Isolated High Yield Lignin Nanoparticles as Innovative Antioxidant/Antimicrobial Organic Materials	ACS SUSTAINABLE CHEMISTRY & ENGINEERING	In this study, dissolution of pristine alkali lignin into ethylene glycol, followed by addition of different acidic conditions (HCl, H2SO4, and H3PO4 at different pH) has been considered as a simple method to prepare high yield lignin nanoparticles (LNP). Field emission scanning electron microscopy (FESEM), Zeta potential, gel permeation chromatography (GPC), and thermogravimetric analysis (TGA) …	Puglia, Debora/0000-0001-8515-7813; KENNY, JOSE/0000-0001-6329-3048	2018	10.1021/acssuschemeng.7b03782
Bonura, G; Migliori, M; Frusteri, L; Cannilla, C; Catizzone, E; Giordano, G; Frusteri, F	Acidity control of zeolite functionality on activity and stability of hybrid catalysts during DME production via CO2 hydrogenation	JOURNAL OF CO2 UTILIZATION	The catalytic behaviour of a CuZnZr-FER hybrid catalyst was assessed in the direct CO2-to-DME hydrogenation reaction, considering the effects of structural and surface properties induced on the system by homemade ferrierite samples at different acidity and grain size. Notwithstanding a comparable initial activity under the adopted experimental conditions (T-R = 220-260 degrees C; PR = 3.0 MPa; GH…	Bonura, Giuseppe/0000-0001-5793-8903; Frusteri, Leone/0000-0002-7657-5391; Catizzone, Enrico/0000-0002-3962-9493; Giordano, Girolamo/0000-0003-2293-718X	2018	10.1016/j.jcou.2018.01.028
Angioni, S; Millia, L; Mustarelli, P; Doria, E; Temporiti, ME; Mannucci, B; Corana, F; Quartarone, E	Photosynthetic microbial fuel cell with polybenzimidazole membrane: synergy between bacteria and algae for wastewater removal and biorefinery	HELIYON	Here, we demonstrate a very efficient simultaneous approach of bioenergy generation from wastewater and added-value compounds production by using a photosynthetic microalgae microbial fuel cells (PMFC), based on polybenzimidazole (PBI) composite membrane as separator. The use of PBI was proved to be very promising, even more convenient than Nafion (TM) in terms of energy performances as well as c…	Temporiti, Marta Elisabetta Eleonora/0000-0001-9437-0034; Doria, Enrico/0000-0002-6805-0202; quartarone, eliana/0000-0002-1192-7747	2018	10.1016/j.heliyon.2018.e00560
Coppola, L; Coffetti, D; Crotti, E	Plain and Ultrafine Fly Ashes Mortars for Environmentally Friendly Construction Materials	SUSTAINABILITY	This paper is aimed to study the rheological and physical performance of mortars manufactured replacing Portland-based cements with low calcium siliceous fly ash (FA) or ultrafine fly ash (UFFA). Five different types of cement (CEM I, CEM II/A-LL, CEM III/A, CEM III/B, and CEM IV according to EN 197-1) were used. Mortars were manufactured with FA or UFFA replacing 5%, 15%, 25%, 35%, and 50% of ce…	Coffetti, Denny/0000-0003-1217-4983; COPPOLA, Luigi/0000-0002-6825-3528; Crotti, Elena/0000-0002-2991-7977	2018	10.3390/su10030874
Dessi, A; Monai, M; Bessi, M; Montini, T; Calamante, M; Mordini, A; Reginato, G; Trono, C; Fornasiero, P; Zani, L	Towards Sustainable H-2 Production: Rational Design of Hydrophobic Triphenylamine-based Dyes for Sensitized Ethanol Photoreforming	CHEMSUSCHEM	Donor-acceptor dyes are a well-established class of photosensitizers, used to enhance visible-light harvesting in solar cells and in direct photocatalytic reactions, such as H-2 production by photoreforming of sacrificial electron donors (SEDs). Amines-typically triethanolamine (TEOA)-are commonly employed as SEDs in such reactions. Dye-sensitized photoreforming of more sustainable, biomass-deriv…	Calamante, Massimo/0000-0003-3194-6395; Fornasiero, Paolo/0000-0003-1082-9157; Zani, Lorenzo/0000-0003-0621-2648; Dessi, Alessio/0000-0002-2813-2369; Mordini, Alessandro/0000-0002-1055-0976; Fornasiero, Paolo/0000-0003-1082-9157; Monai, Matteo/0000-0001-6945-4391; Trono, Cosimo/0000-0001-7822-4459; Zani, Lorenzo/0000-0003-0621-2648; REGINATO, GIANNA/0000-0002-7712-3426; Dessi, Alessio/0000-0003-2…	2018	10.1002/cssc.201701707
Mebrahtu, C; Krebs, F; Perathoner, S; Abate, S; Centi, G; Palkovits, R	Hydrotalcite based Ni-Fe/(Mg, Al)O-x catalysts for CO2 methanation - tailoring Fe content for improved CO dissociation, basicity, and particle size	CATALYSIS SCIENCE & TECHNOLOGY	It is essential for mankind to address greenhouse gas emission, depletion of fossil resources and development of efficient storage and transportation of renewable energy. By using the atmospheric gas CO2 as raw material for the value-added chain, an overall CO2 neutral circular economy is imaginable. The power to gas (PtG) concept tackles all three topics by producing methane as energy carrier us…	Perathoner, Siglinda/0000-0001-8814-1972; Palkovits, Regina/0000-0002-4970-2957; Centi, Gabriele/0000-0001-5626-9840; Krebs, Florian Peter/0000-0003-3547-9261; Mebrahtu, Chalachew/0000-0001-6122-0937	2018	10.1039/c7cy02099f
Colangelo, F; Roviello, G; Ricciotti, L; Ferrandiz-Mas, V; Messina, F; Ferone, C; Tarallo, O; Cioffi, R; Cheeseman, CR	Mechanical and thermal properties of lightweight geopolymer composites	CEMENT & CONCRETE COMPOSITES	This research has investigated the properties of thermally insulating geopolymer composites that were prepared using waste expanded polystyrene as lightweight aggregate. The geopolymer matrix was synthetized using metakaolin and an alkaline activating solution. To improve its mechanical properties, this matrix was modified by the addition of an epoxy resin to form an organic-inorganic composite. …	Ferone, Claudio/0000-0002-8660-3771; Tarallo, Oreste/0000-0001-5952-523X; Cheeseman, Christopher/0000-0001-9123-706X; Ferrandiz-Mas, Veronica/0000-0002-0827-0756; Cioffi, Raffaele/0000-0002-7757-6361	2018	10.1016/j.cemconcomp.2017.11.016
Dragonetti, C; Magni, M; Colombo, A; Melchiorre, F; Biagini, P; Roberto, D	Coupling of a Copper Dye with a Copper Electrolyte: A Fascinating Springboard for Sustainable Dye-Sensitized Solar Cells	ACS APPLIED ENERGY MATERIALS	A simple new heteroleptic copper dye, bearing one 2,9-dimesityl-1,10-phenanthroline and a 6,6'-dimethyl-2,2'-bipyridine-4,4'-dibenzoic acid anchoring ligand, was used as photosensitizer in dye-sensitized solar cells (DSSCs). High power conversion efficiencies are reached not only with conventional I-/I-3(-) electrolyte (40% relative conversion efficiency respect to N719) but, remarkably, also wit…	Magni, Mirko/0000-0001-9776-2973; Colombo, Alessia/0000-0001-8004-3200; ROBERTO, DOMINIQUE MARIE/0000-0001-9659-4760	2018	10.1021/acsaem.7b00196
Zubal, L; Bonani, W; Maniglio, D; Ceccato, R; Renciuk, D; Hampl, A; Migliaresi, C; Jancar, J; Vojtova, L	Soluble collagen dissolution and assembling in pressurized carbon dioxide water solutions	EXPRESS POLYMER LETTERS	Dissolution and gelation procedures have a great influence on gelation time, microstructure and mechanical properties of reconstituted collagen products. We have investigated the dissolution of atelocollagen in CO2/water solutions at low temperature (4 degrees C) at different CO2 pressures (0.3-0.9 MPa), as well as gelation kinetics and physico-chemical properties of the hydrogel obtained after C…	Vojtova, Lucy/0000-0001-5281-7045; Maniglio, Devid/0000-0002-1653-861X; Bonani, Walter/0000-0003-0178-4241; Hampl, Ales/0000-0002-8963-9235	2018	10.3144/expresspolymlett.2018.14
Bontempi, E; Zanoletti, A; Bilo, F; Tushev, K; Valente, G; Zappa, D; Treccani, L; Depero, LE	New Sustainable Hybrid Porous Materials for Air Particulate Matter Trapping	THERMEC 2018: 10TH INTERNATIONAL CONFERENCE ON PROCESSING AND MANUFACTURING OF ADVANCED MATERIALS	Particulate matter (PM) is the air pollutant which has the most severe impact on health. Currently, around 90% of the population of European cities for which PM data exist is exposed to levels exceeding World Health Organization (WHO) air quality guidelines levels. To improve air quality in cities, the challenge is to develop an innovative material solution that can reduce the concentration of PM…	Bontempi, Elza/0000-0003-1656-7506; Bilo, Fabjola/0000-0001-7362-3258; Depero, Laura Eleonora/0000-0001-7818-3212; Zappa, Dario/0000-0001-9838-7511; Zanoletti, Alessandra/0000-0003-0225-7048	2018	10.4028/www.scientific.net/MSF.941.2237
Scarfato, P; Garofalo, E; Coppola, B; Landi, G; Neitzert, HC; Pasquali, M; Bontempi, E	Development and Characterization of PP Eco-Composites Filled with Inertized Residues from Municipal Solid Waste Incinerator	9TH INTERNATIONAL CONFERENCE ON TIMES OF POLYMERS AND COMPOSITES: FROM AEROSPACE TO NANOTECHNOLOGY	In this work it was investigated the possibility to use a low-cost sustainable filler, obtained from municipal solid waste incinerator (MSWI) residues stabilized by COlloidal Silica Medium to Obtain Safe inert (COSMOS) technology, for the development of new eco-friendly PP-based composites. The eco-composites were prepared by melt compounding and tested to verify the effects of the filler additio…	Bontempi, Elza/0000-0003-1656-7506; Landi, Giovanni/0000-0002-0640-479X; Coppola, Bartolomeo/0000-0003-2167-2132	2018	10.1063/1.5045886
Coppola, L; Coffetti, D; Crotti, E	An holistic approach to a sustainable future in concrete construction	FIB CONFERENCE: SUSTAINABLE CONCRETE: MATERIALS AND STRUCTURES, 2018	The main challenge for concrete industry is to serve the two major needs of human society, the protection of the environment, on one hand, and - on the other - the requirements of buildings and infrastructures by the world growing population. In the past, concrete industry has satisfied these needs well. However, for a variety of reasons the situation has changed dramatically in the last years. F…	Coffetti, Denny/0000-0003-1217-4983	2018	10.1088/1757-899X/442/1/012024
Monai, M; Melchionna, M; Fornasiero, P	From metal to metal-free catalysts: Routes to sustainable chemistry	ADVANCES IN CATALYSIS, VOL 63	Catalysts are making our world more sustainable day by day. But how sustainable are catalysts themselves? In this contribution we will give a perspective overview of the progress in dematerializing catalysts, i.e., in using less (critical) materials to deliver the same (or better) level of functionality. This may be accomplished in many ways: improving the catalyst performance and durability by g…	Fornasiero, Paolo/0000-0003-1082-9157; Fornasiero, Paolo/0000-0003-1082-9157; Monai, Matteo/0000-0001-6945-4391	2018	10.1016/bs.acat.2018.10.001
Yang, WJ; Fortunati, E; Luzi, F; Kenny, JM; Torre, L; Puglia, D	Lignocellulosic Based Bionanocomposites for Different Industrial Applications	CURRENT ORGANIC CHEMISTRY	Increased awareness to eco-friendliness and finite petroleum resources trigger growing interest in maximizing the use of low environmental impact and renewable materials. In the last decades, lignocellulosic based materials at the nanoscale level have attracted the attention of research and industry, due to their renewable nature and their abundant availability, their high reactivity surface and …	Puglia, Debora/0000-0001-8515-7813; KENNY, JOSE/0000-0001-6329-3048	2018	10.2174/1385272822666180515120948
Speltini, A; Pisanu, A; Profumo, A; Milanese, C; Sangaletti, L; Drera, G; Patrini, M; Pentimalli, M; Malavasi, L	Rationalization of hydrogen production by bulk g-C3N4: an in-depth correlation between physico-chemical parameters and solar light photocatalysis	RSC ADVANCES	The aim of this work is the systematic study of the photocatalytic activity of bulk graphitic carbon nitride (g-C3N4) in relation with the physical-chemical, structural and optical properties of the semiconductor. Fourteen g-C3N4 samples have been prepared by thermal condensation starting from three different precursor (melamine, dicyandiamide and urea) and exploring various temperatures (in the …	Malavasi, Lorenzo/0000-0003-4724-2376	2018	10.1039/c8ra08880b
Mobili, A; Giosue, C; Corinaldesi, V; Tittarelli, F	Bricks and Concrete Wastes as Coarse and Fine Aggregates in Sustainable Mortars	ADVANCES IN MATERIALS SCIENCE AND ENGINEERING	The total substitution by volume of natural coarse calcareous aggregate by coarse recycled brick aggregate (RBA) and coarse recycled concrete aggregate (RCA) has been investigated to produce more sustainable and environment-friendly mortars. Aggregates were also partially substituted by their fines at 12.5% by volume. Mortars have been tested in terms of mechanical, microstructural, and durabilit…	Giosue, Chiara/0000-0001-6064-6768; Mobili, Alessandra/0000-0002-0891-5649; Tittarelli, Francesca/0000-0001-5805-6822	2018	10.1155/2018/8676708
Balestra, GM; Fortunati, E; Giovanale, G; Mazzaglia, A	Innovative Nanotechnological Tools in Plant and Food Protection	NANOINNOVATION 2017	Nanotechnology is a promising field of interdisciplinary research and its applications into agriculture industry is getting attention due to the potential benefits that nanomaterials can guarantee in several aspects such as pests management. Traditional plant protection strategies often result insufficient, and application of pesticides usually produced negative effects for humans and the environ…	Mazzaglia, Angelo/0000-0002-1295-2565	2018	10.1063/1.5047771
Vitiello, G; Zanfardino, A; Tammaro, O; Di Napoli, M; Caso, MF; Pezzella, A; Varcamonti, M; Silvestri, B; D'Errico, G; Costantini, A; Luciani, G	Bioinspired hybrid eumelanin-TiO2 antimicrobial nanostructures: the key role of organo-inorganic frameworks in tuning eumelanin's biocide action mechanism through membrane interaction	RSC ADVANCES	Intrinsic biocide efficacy of eumelanins can be markedly enhanced through a templated formation in the presence of a TiO2-sol, leading to hybrid TiO2-melanin nanostructures. However, mechanisms and processes behind biocide activity still remain poorly understood. This paper discloses the fundamental mechanism of action of these systems providing mechanistic information on their peculiar interacti…	D'Errico, Gerardino/0000-0001-6383-8618; Pezzella, Alessandro/0000-0001-6925-922X; Caso, Maria Federica/0000-0002-9723-5265	2018	10.1039/c8ra04315a
Mobili, A; Giosue, C; Tittarelli, F	Valorisation of GRP Dust Waste in Fired Clay Bricks	ADVANCES IN CIVIL ENGINEERING	In Europe, the total amount of Glass Reinforced Plastic (GRP) waste is increasing. In order to valorise GRP dust (GRPd) waste and to reduce the consumption of nonrenewable resources in building materials, GRPd has been already investigated in cementitious materials where it gives even an improvement in some performances of the final products. Valorisation of GRPd waste in the production of bricks…	Giosue, Chiara/0000-0001-6064-6768; Mobili, Alessandra/0000-0002-0891-5649; Tittarelli, Francesca/0000-0001-5805-6822	2018	10.1155/2018/5256741
Mobili, A; Tittarelli, F; Revel, GM; Wall, P	VERAM, for a sustainable and competitive future for EU Raw Materials	E-MRS FALL SYMPOSIUM I: SOLUTIONS FOR CRITICAL RAW MATERIALS UNDER EXTREME CONDITIONS	The project, VERAM Vision and Roadmap for European Raw Materials, aims to deliver a mapping of on-going initiatives on non-food, non-energy raw materials (including metals, industrial minerals, aggregates and wood) at European, Member State, and regional levels both from the Research and Innovation (R&I), industry, and policy perspectives. Moreover, based on a comprehensive gap analysis, VERAM wi…	Mobili, Alessandra/0000-0002-0891-5649	2018	10.1088/1757-899X/329/1/012001
Olivo, A; Ghedini, E; Pascalicchio, P; Manzoli, M; Cruciani, G; Signoretto, M	Sustainable Carbon Dioxide Photoreduction by a Cooperative Effect of Reactor Design and Titania Metal Promotion	CATALYSTS	An effective process based on the photocatalytic reduction of CO2 to face on the one hand, the crucial problem of environmental pollution, and, on the other hand, to propose an efficient way to product clean and sustainable energy sources has been developed in this work. Particular attention has been paid to the sustainability of the process by using a green reductant (water) and TiO2 as a photoc…	Manzoli, Maela/0000-0002-4427-7939; Cruciani, Giuseppe/0000-0002-4269-697X; Olivo, Alberto/0000-0002-6425-5518	2018	10.3390/catal8010041
Messina; Ferone; Colangelo; Roviello; Cioffi	Alkali activated waste fly ash as sustainable composite: Influence of curing and pozzolanic admixtures on the early-age physico-mechanical properties and residual strength after exposure at elevated temperature	COMPOSITES PART B-ENGINEERING	Waste fly ash, referred in literature also as weathered, represents a major management issue for coal-fired power plants. The low qualification of this relevant fraction of produced fly ash is not adequate for recycling in structural concrete. Non-structural applications may represent an economically feasible solution to maximize the recovery of coal fly ash from power plants. A potentially valua…	Cioffi, Raffaele/0000-0002-7757-6361; Ferone, Claudio/0000-0002-8660-3771	2018	10.1016/j.compositesb.2017.08.012
Jantan, KA; Kwok, CY; Chan, KW; Marchio, L; White, AJP; Deplano, P; Serpe, A; Wilton-Ely, JDET	From recovered metal waste to high-performance palladium catalysts	GREEN CHEMISTRY	The catalytic activity of a series of neutral and cationic, homo- and heteroleptic, mono- and bimetallic palladium(II) compounds based on dithiocarbamate and dithiooxamide S, S-donor ligands is described. High activity was observed in the regio- and chemo-selective C-H functionalization of benzo[h] quinoline to 10-alkoxy-benzo[h] quinoline and 8-methylquinoline to 8-(methoxymethyl) quinoline in t…	Wilton-Ely, James D/0000-0002-5192-3038; Marchio', Luciano/0000-0002-0025-1104; SERPE, ANGELA/0000-0002-3476-0636	2017	10.1039/c7gc02678a
Marepally, BC; Ampelli, C; Genovese, C; Saboo, T; Perathoner, S; Wisser, FM; Veyre, L; Canivet, J; Quadrelli, EA; Centi, G	Enhanced formation of > C1 Products in Electroreduction of CO2 by Adding a CO2 Adsorption Component to a Gas-Diffusion Layer-Type Catalytic Electrode	CHEMSUSCHEM	The addition of a CO2-adsorption component (substituted imidazolate-based SIM-1 crystals) to a gas-diffusion layer-type catalytic electrode enhances the activity and especially the selectivity towards > C1 carbon chain products (ethanol, acetone, and isopropanol) of a Pt-based electrocatalyst that is not able to form products of CO, reduction involving C C bond formation under conventional (liqui…	Ampelli, Claudio/0000-0001-7048-976X; Perathoner, Siglinda/0000-0001-8814-1972; Centi, Gabriele/0000-0001-5626-9840; Canivet, Jerome/0000-0002-0458-3085; Wisser, Florian M/0000-0002-5925-895X; MAREPALLY, BHANU CHANDRA/0000-0001-5836-856X; GENOVESE, Chiara/0000-0002-4939-2442; Wisser, Florian M./0000-0002-5925-895X	2017	10.1002/cssc.201701506
Lanzafame, P; Perathoner, S; Centi, G; Gross, S; Hensen, EJM	Grand challenges for catalysis in the Science and Technology Roadmap on Catalysis for Europe: moving ahead for a sustainable future	CATALYSIS SCIENCE & TECHNOLOGY	This perspective discusses the general concepts that will guide future catalysis and related grand challenges based on the Science and Technology Roadmap on Catalysis for Europe prepared by the European Cluster on Catalysis. To address the changing scenarios in refinery and chemical production and move to a lowcarbon sustainable future, the distinguishing elements of three grand challenges for ca…	Perathoner, Siglinda/0000-0001-8814-1972; Hensen, Emiel/0000-0002-9754-2417; Centi, Gabriele/0000-0001-5626-9840; LANZAFAME, PAOLA/0000-0002-6092-346X; Gross, Silvia/0000-0003-1860-8711	2017	10.1039/c7cy01067b
Colombo, A; Di Carlo, G; Dragonetti, C; Magni, M; Biroli, AO; Pizzotti, M; Roberto, D; Tessore, F; Benazzi, E; Bignozzi, CA; Casarin, L; Caramori, S	Coupling of Zinc Porphyrin Dyes and Copper Electrolytes: A Springboard for Novel Sustainable Dye-Sensitized Solar Cells	INORGANIC CHEMISTRY	The combination of beta-substituted Zn2+ porphyrin dyes and copper-based electrolytes represents a sustainable route for economic and environmentally friendly dye-sensitized solar cells. Remarkably, a new copper electrolyte, [Cu(2-mesityl-1,10-phenanthroline)2] (+/2+), exceeds the performance reached by Co2+/3+ and I-/reference electrolytes.	/0000-0002-5463-1444; Magni, Mirko/0000-0001-9776-2973; /0000-0002-6691-0256; Pizzotti, Maddalena/0000-0003-2232-9694; Benazzi, Elisabetta/0000-0001-6756-3842; ROBERTO, DOMINIQUE MARIE/0000-0001-9659-4760; DI CARLO, GABRIELE/0000-0002-8782-7945	2017	10.1021/acs.inorgchem.7b02323
Compagnoni, M; Mostafavi, E; Tripodi, A; Mahinpey, N; Rossetti, I	Techno-economic Analysis of a Bioethanol to Hydrogen Centralized Plant	ENERGY & FUELS	The possibility to obtain chemicals and/or fuels from renewable sources is an attractive option in order to develop an integrated biorefinery concept. Bioethanol can be a suitable starting material for the production of H, as fuel or syngas. Hydrogen is considered as a future energy vector that can meet the ever growing world energy demand in a clean and sustainable way. Moreover, it can be used …	Mostafavi, Ehsan/0000-0002-1997-517X; Rossetti, Ilenia/0000-0001-5882-5011	2017	10.1021/acs.energyfuels.7b02434
Silvestri, B; Vitiello, G; Luciani, G; Calcagno, V; Costantini, A; Gallo, M; Parisi, S; Paladino, S; Iacomino, M; D'Errico, G; Caso, MF; Pezzella, A; d'Ischia, M	Probing the Eumelanin-Silica Interface in Chemically Engineered Bulk Hybrid Nanoparticles for Targeted Subcellular Antioxidant Protection	ACS APPLIED MATERIALS & INTERFACES	We disclose herein the first example of stable monodispersed hybrid nanoparticles (termed MelaSil-NPs) made up of eumelanin biopolymer intimately integrated into a silica nanoscaffold matrix and endowed with high antioxidant and cytoprotective effects associated with a specific subcellular localization. MelaSil-NPs have been fabricated by an optimized sol-gel methodology involving ammonia-induced…	Paladino, Simona/0000-0001-5332-6774; Pezzella, Alessandro/0000-0001-6925-922X; D'Errico, Gerardino/0000-0001-6383-8618; d'Ischia, Marco/0000-0002-7184-0029; Calcagno, Vincenzo/0000-0001-7005-7668; Caso, Maria Federica/0000-0002-9723-5265	2017	10.1021/acsami.7b11839
Marepally, BC; Ampelli, C; Genovese, C; Tavella, F; Veyre, L; Quadrelli, EA; Perathoner, S; Centi, G	Role of small Cu nanoparticles in the behaviour of nanocarbon-based electrodes for the electrocatalytic reduction of CO2	JOURNAL OF CO2 UTILIZATION	We report here an easy and scalable synthetic route for the preparation of Cu-based nanoelectrodes active in CeC coupling in the process of CO2 electrocatalytic reduction. Copper nanowires (NWs) are used as the precursor for the deposition of small Cu nanoparticles (NPs) onto commercial carbon nanotubes (CNTs), preliminarily activated with HNO3 to create oxygen functional groups on their external…	MAREPALLY, BHANU CHANDRA/0000-0001-5836-856X; Centi, Gabriele/0000-0001-5626-9840; Ampelli, Claudio/0000-0001-7048-976X; Perathoner, Siglinda/0000-0001-8814-1972; GENOVESE, Chiara/0000-0002-4939-2442	2017	10.1016/j.jcou.2017.08.008
Grazia, L; Bonincontro, D; Lolli, A; Tabanelli, T; Lucarelli, C; Albonetti, S; Cavani, F	Exploiting H-transfer as a tool for the catalytic reduction of bio-based building blocks: the gas-phase production of 2-methylfurfural using a FeVO4 catalyst	GREEN CHEMISTRY	Over the past decade, a great deal of effort has been devoted to developing reductive processes in the field of biomass valorisation for the sustainable production of bio-fuel additives and chemicals. Catalytic transfer hydrogenation, which uses alcohol as the hydrogen source, is an interesting approach that avoids the use of both high H-2 pressure and precious metal catalysts. In this work, the …	Albonetti, Stefania/0000-0002-2371-3228; Tabanelli, Tommaso/0000-0003-0616-8990; Lucarelli, Carlo/0000-0002-5098-0575; BONINCONTRO, DANILO/0000-0002-8869-8217; CAVANI, FABRIZIO/0000-0002-4282-6260; Grazia, Lorenzo/0000-0003-3785-0757	2017	10.1039/c7gc01749a
Bontempi, E	A new approach for evaluating the sustainability of raw materials substitution based on embodied energy and the CO2 footprint	JOURNAL OF CLEANER PRODUCTION	The aim of this paper is to propose a simplified method of quantifying the environmental sustainability of raw materials substitution. This method is based on the use of two parameters that account for the energies and emissions involved in the formation of a material. The embodied energy and CO2 footprint are used to define a SUB-RAW index, which is used to compare the environmental performances…	Bontempi, Elza/0000-0003-1656-7506	2017	10.1016/j.jclepro.2017.06.028
Melchionna, M; Fornasiero, P	Sustainability and Nanomaterials in Concert	CHEMCATCHEM	Sustainable energy and the environment are one of the central priorities for our society, triggering a massive capital investment on research to define new trajectories for bypassing fossil fuel dependence and move to clean energy and consequent pollution abatement. The last decade has witnessed the rise and establishment of nanomaterials as frontrunners for a real societal impact of key processe…	Melchionna, Michele/0000-0001-9813-9753; Fornasiero, Paolo/0000-0003-1082-9157; Fornasiero, Paolo/0000-0003-1082-9157	2017	10.1002/cctc.201700489
Olivo, A; Ghedini, E; Signoretto, M; Compagnoni, M; Rossetti, I	Liquid vs. Gas Phase CO2 Photoreduction Process: Which Is the Effect of the Reaction Medium?	ENERGIES	The use of carbon dioxide, the most concerning environmental issue of the 21st century, as a feedstock for fuels productions still represents an innovative, yet challenging, task for the scientific community. CO2 photoreduction processes have the potential to transform this hazardous pollutant into important products for the energy industry (e.g., methane and methanol) employing a photocatalyst a…	Rossetti, Ilenia/0000-0001-5882-5011; Olivo, Alberto/0000-0002-6425-5518	2017	10.3390/en10091394
Dall'Asta, V; Berbenni, V; Mustarelli, P; Ravelli, D; Samori, C; Quartarone, E	A biomass-derived polyhydroxyalkanoate biopolymer as safe and environmental-friendly skeleton in highly efficient gel electrolytes for lithium batteries	ELECTROCHIMICA ACTA	The massive use of lithium batteries in industries, such as automotive and electrical network accumulation, requires the development of safer electrolytes, economic and possibly made from renewable resources using eco-friendly processes. In this work, we reported the synthesis and the physico-chemical and functional characterization of a polymer gel electrolyte (GPE) based on a skeleton of polyhy…	Ravelli, Davide/0000-0003-2201-4828; Samori, Chiara/0000-0002-5448-2709; quartarone, eliana/0000-0002-1192-7747	2017	10.1016/j.electacta.2017.07.005
Ghedini, E; Pizzolitto, C; Albore, G; Menegazzo, F; Signoretto, M; Operti, L; Cerrato, G	Sulfadiazine-based drug delivery systems prepared by an effective sol-gel process	JOURNAL OF SOL-GEL SCIENCE AND TECHNOLOGY	In the present contribution a versatile and sustainable strategy for the formulation of a drug delivery system for the controlled release of antibiotics for topical administration was developed. Silver sulfadiazine (AgSD), an antimicrobial agent for preventing infections on burn wounds, was selected as model drug. The drug delivery system was formulated by an effective one-pot sol-gel approach by…	Menegazzo, Federica/0000-0001-8023-6379	2017	10.1007/s10971-017-4446-4
Bonura, G; Cannilla, C; Frusteri, L; Frusteri, F	The influence of different promoter oxides on the functionality of hybrid CuZn-ferrierite systems for the production of DME from CO2-H-2 mixtures	APPLIED CATALYSIS A-GENERAL	In this work the one pot production of dimethylether (DME) by catalytic hydrogenation of carbon dioxide has been studied. The catalytic behaviour of the CuZn-ferrierite hybrid system has been assessed, considering the influence of five different oxides promoters (i.e., ZrO2, CeO2, La2O3, Al2O3, Ga2O3) both on the physico-chemical properties (ie., surface area, pore volume, copper surface area and…	Bonura, Giuseppe/0000-0001-5793-8903; Frusteri, Leone/0000-0002-7657-5391	2017	10.1016/j.apcata.2017.07.010
Suchomski, C; Weber, DJ; Dolcet, P; Hofmann, A; Voepel, P; Yue, J; Einert, M; Moller, M; Werner, S; Gross, S; Djerdj, I; Brezesinski, T; Smarsly, BM	Sustainable and surfactant-free high-throughput synthesis of highly dispersible zirconia nanocrystals	JOURNAL OF MATERIALS CHEMISTRY A	Herein, a cost-effective and tailored synthesis route for the preparation of cubic ZrO2 nanocrystals with high dispersibility (up to 45% by weight in H2O) is reported. The procedure is straightforward and produces uniform 2-3 nm particles of a high yield of up to 98% when applying microwave dielectric heating as a green method. Furthermore, it can be applied to a wide range of batch sizes (from 0…	Voepel, Pascal/0000-0001-8233-7261; Gross, Silvia/0000-0003-1860-8711; Brezesinski, Torsten/0000-0002-4336-263X; Djerdj, Igor/0000-0002-0646-4928	2017	10.1039/c7ta02316b
Rossetti, I; Compagnoni, M; Finocchio, E; Ramis, G; Di Michele, A; Millot, Y; Dzwigaj, S	Ethylene production via catalytic dehydration of diluted bioethanol: A step towards an integrated biorefinery	APPLIED CATALYSIS B-ENVIRONMENTAL	After a preliminary thermodynamic investigation, proper operating conditions have been selected to maximise ethylene productivity by ethanol dehydration and limit side products such as coke and higher olefins or oxygenates. We focused on the possibility to operate with a diluted bioethanol solution (ca. 50 wt%), which represents a promising and convenient raw material, obtainable by simple flash …		2017	10.1016/j.apcatb.2017.04.007
Chen, SM; Perathoner, S; Ampelli, C; Mebrahtu, C; Su, DS; Centi, G	Room-Temperature Electrocatalytic Synthesis of NH3 from H2O and N-2 in a Gas-Liquid-Solid Three-Phase Reactor	ACS SUSTAINABLE CHEMISTRY & ENGINEERING	Fe2O3-CNT samples are studied for the room temperature electrocatalytic synthesis of NH3 from H2O and N-2 in a gas-liquid-solid three-phase reactor. A 30 wt % iron-oxide loading was found to be optimal. The performances greatly depend on the cell design, where the possibility of ammonia crossover through the membrane has to be inhibited. The reaction conditions also play a significant role. The e…	Perathoner, Siglinda/0000-0001-8814-1972; Centi, Gabriele/0000-0001-5626-9840; Ampelli, Claudio/0000-0001-7048-976X; Mebrahtu, Chalachew/0000-0001-6122-0937; Chen, Shiming/0000-0002-6660-7935	2017	10.1021/acssuschemeng.7b01742
Chieruzzi, M; Cerritelli, GF; Miliozzi, A; Kenny, JM; Torre, LG	Heat capacity of nanofluids for solar energy storage produced by dispersing oxide nanoparticles in nitrate salt mixture directly at high temperature	SOLAR ENERGY MATERIALS AND SOLAR CELLS	Molten salts as phase change materials (PCMs) can be used as thermal storage media in concentrated solar power (CSP) plants. The addition of nanoparticles into a base fluid (producing the so called nanofluid) can enhance its thermal properties. The most common technique involves the use of water. We present a new procedure based on high temperature mixing. In particular, different nanofluids were…	KENNY, JOSE/0000-0001-6329-3048; TORRE, Luigi/0000-0001-7872-5712	2017	10.1016/j.solmat.2017.04.011
Ampelli, C; Tavella, F; Perathoner, S; Centi, G	Engineering of photoanodes based on ordered TiO2-nanotube arrays in solar photo-electrocatalytic (PECa) cells	CHEMICAL ENGINEERING JOURNAL	Photoanodes based on undoped TiO2 nanotube (TNT) thin films, fabricated by anodic oxidation of Ti foils modulating the anodization time (from 30 min to 5 h), were analysed and tested in a compact photoelectrocatalytic (PECa) device for H-2 generation by water photo-electrolysis. The vertically aligned TNT films differ only in the film thickness (i.e. the length of the nanotubes), but they show: i…	Ampelli, Claudio/0000-0001-7048-976X; Perathoner, Siglinda/0000-0001-8814-1972; Centi, Gabriele/0000-0001-5626-9840	2017	10.1016/j.cej.2017.03.066
Nitti, A; Bianchi, G; Po, R; Swager, TM; Pasini, D	Domino Direct Arylation and Cross-Aldol for Rapid Construction of Extended Polycyclic pi-Scaffolds	JOURNAL OF THE AMERICAN CHEMICAL SOCIETY	Five-membered aromatic heterocycles are a ubiquitous skeleton of pi-conjugated organic compounds, and their incorporation requires synthetic protocols that are not easily industrially sustainable or scalable. Improved methodologies for their insertion into pi-scaffolds are therefore necessary. We report an efficient and scalable protocol involving a one-pot cross-Aldol direct arylation reaction p…	Nitti, Andrea/0000-0002-7232-5707; Po, Riccardo/0000-0002-8374-195X; Pasini, Dario/0000-0002-8273-3798	2017	10.1021/jacs.7b03412
Shen, Y; Posavec, L; Bolisetty, S; Hilty, FM; Nystrom, G; Kohlbrecher, J; Hilbe, M; Rossi, A; Baumgartner, J; Zimmermann, MB; Mezzenga, R	Amyloid fibril systems reduce, stabilize and deliver bioavailable nanosized iron	NATURE NANOTECHNOLOGY	Iron-deficiency anaemia (IDA) is a major global public health problem(1). A sustainable and cost-effective strategy to reduce IDA is iron fortification of foods(2), but the most bioavailable fortificants cause adverse organoleptic changes in foods(3,4). Iron nanoparticles are a promising solution in food matrices(5-7), although their tendency to oxidize and rapidly aggregate in solution severely …	Shen, Yi/0000-0002-0456-3850; Nystrom, Gustav/0000-0003-2739-3222; Shen, Yi/0000-0002-0456-3850; Rossi, Antonella/0000-0002-5151-2634; Kohlbrecher, Joachim/0000-0001-5879-6943; Baumgartner, Jeannine/0000-0002-9107-4181; Hilty, Florentine/0000-0003-4848-9960	2017	10.1038/NNANO.2017.58
Antonetti, C; Melloni, M; Licursi, D; Fulignati, S; Ribechini, E; Rivas, S; Parajo, JC; Cavani, F; Galletti, AMR	Microwave-assisted dehydration of fructose and inulin to HMF catalyzed by niobium and zirconium phosphate catalysts	APPLIED CATALYSIS B-ENVIRONMENTAL	5-Hydroxymethyl-2-furaldehyde (HMF) is a key bio-based platform for the production of renewable monomers and bio-fuels. However, most of its syntheses are carried out under not sustainable conditions. In this work, the production of HMF from fructose and inulin was investigated following the Green Chemistry principles, adopting aqueous medium, appreciable substrate concentration (10wt%), low load…	Rivas, Sandra/0000-0003-3752-6092; Galletti, Anna Maria Raspolli/0000-0002-0622-844X; Ribechini, Erika/0000-0002-4978-2782; FULIGNATI, Sara/0000-0003-4971-2095; LICURSI, DOMENICO/0000-0003-0290-5359	2017	10.1016/j.apcatb.2017.01.056
Manfredi, N; Monai, M; Montini, T; Salamone, M; Ruffo, R; Fornasiero, P; Abbotto, A	Enhanced photocatalytic hydrogen generation using carbazole-based sensitizers	SUSTAINABLE ENERGY & FUELS	Phenothiazine-, phenoxazine- and carbazole-based dyes have been synthesized and used as photosensitizers in Pt/TiO2 films for photocatalytic hydrogen generation. Compared to commonly used phenothiazine dyes, planar and sulphur-free carbazole derivatives showed differentmolecular and supramolecular featureswhich in turn yielded greatly enhanced (one order of magnitude) H-2 production performances.	Fornasiero, Paolo/0000-0003-1082-9157; Ruffo, Riccardo/0000-0001-7509-7052; Manfredi, Norberto/0000-0002-3802-1953; Fornasiero, Paolo/0000-0003-1082-9157; Monai, Matteo/0000-0001-6945-4391; MONTINI, Tiziano/0000-0001-9515-566X; Abbotto, Alessandro/0000-0002-0165-5581	2017	10.1039/c7se00075h
Benassi, L; Dalipi, R; Consigli, V; Pasquali, M; Borgese, L; Depero, LE; Clegg, F; Bingham, PA; Bontempi, E	Integrated management of ash from industrial and domestic combustion: a new sustainable approach for reducing greenhouse gas emissions from energy conversion	ENVIRONMENTAL SCIENCE AND POLLUTION RESEARCH	This work supports, for the first time, the integrated management of waste materials arising from industrial processes (fly ash from municipal solid waste incineration and coal fly ash), agriculture (rice husk ash), and domestic activities (ash from wood biomass burning in domestic stoves). The main novelty of the paper is the reuse of wood pellet ash, an underestimated environmental problem, by …	Bontempi, Elza/0000-0003-1656-7506; Dalipi, Rogerta/0000-0002-3430-5510; Depero, Laura Eleonora/0000-0001-7818-3212	2017	10.1007/s11356-017-9037-y
Ballarin, B; Barreca, D; Boanini, E; Cassani, MC; Dambruoso, P; Massi, A; Mignani, A; Nanni, D; Parise, C; Zaghi, A	Supported Gold Nanoparticles for Alcohols Oxidation in Continuous Flow Heterogeneous Systems	ACS SUSTAINABLE CHEMISTRY & ENGINEERING	Gold nanoparticles (AuNps) were anchored on alkynyl carbamate-functionalized support materials having the suitable features for application as catalysts in continuous-flow packed bed reactors. The functionalization step was carried out by grafting with the difunctional organosilane [3-(2-propynylcarbamate)propyl]triethoxysilane (PPTEOS) three commercial micrometer-sized oxide supports, i.e. silic…	Barreca, Davide/0000-0002-8779-3386; Cassani, Maria-Cristina/0000-0002-7155-8744; Massi, Alessandro/0000-0001-8303-5441; NANNI, DANIELE/0000-0003-1472-1194; Boanini, Elisa/0000-0003-3754-0273	2017	10.1021/acssuschemeng.7b00133
Xu, JY; Zhang, BS; Wang, BL; Wu, K; Peng, ZQ; Li, QF; Centi, G; Su, DS	Decisive Intermediates Responsible for the Carbonaceous Products of CO2 Electro-reduction on Nitrogen-Doped sp(2) Nanocarbon Catalysts in NaHCO3 Aqueous Electrolyte	CHEMELECTROCHEM	Nitrogen-doped sp(2) nanocarbon materials have been considered promising catalysts for CO2 electro-reduction. However, a fundamental understanding about product selectivity and the reaction routes is still lacking. In this report, the reaction mechanism on nitrogen-doped sp(2) nanocarbon materials is resolved by clarifying the authentic origin of the carbonaceous products: CO and HCO2 . Two carbo…	Peng, Zhangquan/0000-0002-4338-314X; Wang, Bo-Lun/0000-0002-1235-686X; Zhang, Bingsen/0000-0002-2607-2999; Centi, Gabriele/0000-0001-5626-9840; Wu, Kuang-Hsu (Tim)/0000-0002-7670-7948; Li, Qingfeng/0000-0002-5460-055X	2017	10.1002/celc.201700104
Navarrete, A; Centi, G; Bogaerts, A; Martin, A; York, A; Stefanidis, GD	Harvesting Renewable Energy for Carbon Dioxide Catalysis	ENERGY TECHNOLOGY	The use of renewable energy (RE) to transform carbon dioxide into commodities (i.e., CO2 valorization) will pave the way towards a more sustainable economy in the coming years. But how can we efficiently use this energy (mostly available as electricity or solar light) to drive the necessary (catalytic) transformations? This paper presents a review of the technological advances in the transformati…	Bogaerts, Annemie/0000-0001-9875-6460; Centi, Gabriele/0000-0001-5626-9840; Stefanidis, Georgios/0000-0002-4347-1350; Stefanidis, Georgios/0000-0003-0783-0456; Martin, Angel/0000-0002-2824-2496	2017	10.1002/ente.201600609
Bassini, E; Vola, V; Lorusso, M; Ghisleni, R; Lombardi, M; Biamino, S; Ugues, D; Vallillo, G; Picque, B	Net shape HIPping of Ni-superalloy: Study of the interface between the capsule and the alloy	MATERIALS SCIENCE AND ENGINEERING A-STRUCTURAL MATERIALS PROPERTIES MICROSTRUCTURE AND PROCESSING	Nowadays, an increasing number of components are manufactured using Hot Isostatic Pressing (HIP), which is considered a near net or net shape forming technology, depending on the overstock thickness. One of the most challenging tasks with regard to improving HIP is limiting the interaction between the capsule and the consolidating powders, aiming to reduce material waste and costs. The capsule is…	Bassini, Emilio/0000-0003-4751-4327; Lorusso, Massimo/0000-0002-9397-0676; Lombardi, Mariangela/0000-0002-1546-8525; UGUES, Daniele/0000-0002-6543-5916; Biamino, Sara/0000-0003-1840-7717	2017	10.1016/j.msea.2017.04.016
Christoforidis, KC; Fornasiero, P	Photocatalytic Hydrogen Production: A Rift into the Future Energy Supply	CHEMCATCHEM	Photocatalytic hydrogen (H-2) production is a process that converts solar energy into chemical energy by means of a suitable photocatalyst. After the huge amount of systems that have been tested in the last forty years, the advent of nanotechnology and a careful design at molecular level, allow to obtain attractive activity, even using pure visible light. At the same time we are approaching reaso…	Fornasiero, Paolo/0000-0003-1082-9157; Christoforidis, Konstantinos C./0000-0002-3941-0299; Fornasiero, Paolo/0000-0003-1082-9157	2017	10.1002/cctc.201601659
Rodella, N; Bosio, A; Dalipi, R; Zacco, A; Borgese, L; Depero, LE; Bontempi, E	Waste silica sources as heavy metal stabilizers for municipal solid waste incineration fly ash	ARABIAN JOURNAL OF CHEMISTRY	The present work discusses a new method, based on the use of silica fume, for heavy metal stabilization. The inertization procedure is reported and compared with other technologies, involving the employ of amorphous silica as stabilizing agent for municipal solid waste incinerator fly ash treatment (i.e. colloidal silica and rice husk ash). The obtained final materials are characterized in terms …	Bontempi, Elza/0000-0003-1656-7506; ZACCO, Annalisa/0000-0001-6572-8981; Dalipi, Rogerta/0000-0002-3430-5510; Depero, Laura Eleonora/0000-0001-7818-3212; borgese, laura/0000-0003-3486-2656	2017	10.1016/j.arabjc.2014.04.006
Colangelo, F; Messina, F; Di Palma, L; Cioffi, R	Recycling of non-metallic automotive shredder residues and coal fly-ash in cold-bonded aggregates for sustainable concrete	COMPOSITES PART B-ENGINEERING	In order to achieve the relevant objectives of EC directive on end-of-life of vehicles (2000/53/CE), innovative solutions such as recycling automotive shredder residues are required. This paper deals with the design and characterization of concrete mixtures containing artificial aggregates obtained through the cold-bonding pelletization of non-metallic fraction of automotive shredder residues, co…	Di Palma, Luca/0000-0003-4838-7227; Cioffi, Raffaele/0000-0002-7757-6361	2017	10.1016/j.compositesb.2017.02.004
Cuscusa, M; Rigoldi, A; Artizzu, F; Cammi, R; Fornasiero, P; Deplano, P; Marchio, L; Serpe, A	Ionic Couple-Driven Palladium Leaching by Organic Triiodide Solutions	ACS SUSTAINABLE CHEMISTRY & ENGINEERING	Pd dissolution capabilities of a variety of organic triiodides (OrgI(3)) in organic solvent, where Org(+) = 3,5-bis(phenylamino)-1,2-dithiolylium [(PhHN)(2)DTL+], 3,5-bis(morpholino)-1,2-dithiolylium (Mo2DTL+); tetrabuthylammonium (TBA(+)); and tetraphenylphosphonium (Ph4P+), toward the crude metal and model-spent three-way catalyst (TWC), are described here. Enhanced Pd-leaching yields from TWC …	Fornasiero, Paolo/0000-0003-1082-9157; Marchio', Luciano/0000-0002-0025-1104; Fornasiero, Paolo/0000-0003-1082-9157; SERPE, ANGELA/0000-0002-3476-0636	2017	10.1021/acssuschemeng.7b00410
Angioni, S; Millia, L; Bruni, G; Ravelli, D; Mustarelli, P; Quartarone, E	Novel composite polybenzimidazole-based proton exchange membranes as efficient and sustainable separators for microbial fuel cells	JOURNAL OF POWER SOURCES	Microbial fuel cells (MFCs) are gaining increasing technological relevance for wastewater remediation and ancillary energy production. MFC separators are often fabricated with ion-exchange perfiuorinated membranes, the most common of them being Nafion (TM). Here, we prepared composite separators based on polybenzimidazole (PBI), where the filler is made of SBA-15 mesostructured silica functionali…	Ravelli, Davide/0000-0003-2201-4828; Mustarelli, Piercarlo/0000-0001-9954-5200; quartarone, eliana/0000-0002-1192-7747	2017	10.1016/j.jpowsour.2017.02.084
Minieri, L; Esposito, S; Russo, V; Bonelli, B; Di Serio, M; Silvestri, B; Vergara, A; Aronne, A	A Sol-Gel Ruthenium-Niobium-Silicon Mixed-Oxide Bifunctional Catalyst for the Hydrogenation of Levulinic Acid in the Aqueous Phase	CHEMCATCHEM	A mixed-oxide nanomaterial with composition (RuO2)(0.038)(Nb2O5)(0.024)(SiO2)(0.938) was prepared by a one-pot sol-gel route. The synthesis was entirely performed at room temperature, by using easy-to-handle precursors and avoiding the employment of any toxic and/or polluting reactant. One of the samples was synthesised in the presence of a non-ionic surfactant acting as both pore directing agent…	Di Serio, Martino/0000-0003-4489-7115; Russo, Vincenzo/0000-0002-1867-739X; ESPOSITO, Serena/0000-0001-9159-0541; ARONNE, Antonio/0000-0002-2711-6789	2017	10.1002/cctc.201601547
Passalacqua, R; Perathoner, S; Centi, G	Semiconductor, molecular and hybrid systems for photoelectrochemical solar fuel production	JOURNAL OF ENERGY CHEMISTRY	The paper shortly reviews the basic direct approaches applied in searching for viable solutions to solar fuel production. These are generally distinguished in molecular and semiconductor (non-molecular) systems, however, hybrid strategies, proposed recently, have also been included. The most promising efforts are considered, highlighting key aspects and emerging critical issues. Special attention…	Perathoner, Siglinda/0000-0001-8814-1972; Centi, Gabriele/0000-0001-5626-9840; Passalacqua, Rosalba/0000-0002-5796-1000	2017	10.1016/j.jechem.2017.03.004
Cabrini, M; Lorenzi, S; Pastore, T; Pellegrini, S; Burattini, M; Miglio, R	Study of the Corrosion Resistance of Austenitic Stainless Steels during Conversion of Waste to Biofuel	MATERIALS	The paper deals with the corrosion behavior of stainless steels as candidate materials for biofuel production plants by liquefaction process of the sorted organic fraction of municipal solid waste. Corrosion tests were carried out on AISI 316L and AISI 304L stainless steels at 250 degrees C in a batch reactor during conversion of raw material to bio-oil (biofuel precursor), by exposing specimens …	Cabrini, Marina/0000-0003-3901-8657; Lorenzi, Sergio/0000-0002-1337-7590; Pastore, Tommaso/0000-0002-1443-7786	2017	10.3390/ma10030325
Frusteri, F; Migliori, M; Cannilla, C; Frusteri, L; Catizzone, E; Aloise, A; Giordano, G; Bonura, G	Direct CO2-to-DME hydrogenation reaction: New evidences of a superior behaviour of FER-based hybrid systems to obtain high DME yield	JOURNAL OF CO2 UTILIZATION	The catalytic behaviour of Cu-Zn-Zr/zeolite hybrid systems, in which metallic and acidic functionalities were combined at level of single grain, was evaluated in the direct DME production by CO2 hydrogenation. Catalysts were prepared by co-precipitation of the metals precursors in a slurry of three home-made powdered zeolites, characterized by different dimensional frameworks (i.e., MOR, FER, MFI…	Bonura, Giuseppe/0000-0001-5793-8903; Catizzone, Enrico/0000-0002-3962-9493; Giordano, Girolamo/0000-0003-2293-718X; Frusteri, Leone/0000-0002-7657-5391	2017	10.1016/j.jcou.2017.01.030
Kierkowicz, M; Gonzalez-Dominguez, JM; Pach, E; Sandoval, S; Ballesteros, B; Da Ros, T; Tobias, G	Filling Single-Walled Carbon Nanotubes with Lutetium Chloride: A Sustainable Production of Nanocapsules Free of Nonencapsulated Material	ACS SUSTAINABLE CHEMISTRY & ENGINEERING	Filled carbon nanotubes are of interest for a wide variety of applications ranging from sensors to magnetoelectronic devices and going through the development of smart contrast and therapeutic agents in the biomedical field. In general, regardless of the method employed, bulk filling of carbon nanotubes results in the presence of a large amount of external nonencapsulated material. Therefore, fur…	Tobias, Gerard/0000-0001-7116-2152; Rojano, Stefania Sandoval/0000-0002-0050-7501; Ballesteros, Belen/0000-0002-1958-8911; Pach, Elzbieta/0000-0001-9587-3768; Gonzalez-Dominguez, Jose Miguel/0000-0002-0701-7695	2017	10.1021/acssuschemeng.6b02850
Ampelli, C; Tavella, F; Genovese, C; Perathoner, S; Favaro, M; Centi, G	Analysis of the factors controlling performances of Au-modified TiO2 nanotube array based photoanode in photo-electrocatalytic (PECa) cells	JOURNAL OF ENERGY CHEMISTRY	The efficiency of photo-electrocatalytic (PECa) devices for the production of solar fuels depends on several limiting factors such as light harvesting, charge recombination and mass transport diffusion. We analyse here how they influence the performances in PECa cells having a photo-anode based on Au-modified TiO2 nanotube (TNT) arrays, with the aim of developing design criteria to optimize the p…	Centi, Gabriele/0000-0001-5626-9840; Ampelli, Claudio/0000-0001-7048-976X; GENOVESE, Chiara/0000-0002-4939-2442; Perathoner, Siglinda/0000-0001-8814-1972; Favaro, Marco/0000-0002-3502-8332	2017	10.1016/j.jechem.2016.11.004
Mura, S; Malfatti, L; Greppi, G; Innocenzi, P	Ferrates for water remediation	REVIEWS IN ENVIRONMENTAL SCIENCE AND BIO-TECHNOLOGY	The availability of safe drinking-water at the global level is one of the biggest challenges of our century. At present, toxins and pathogens in fresh waters are responsible for more than two million deaths per year. This scenario allows understanding how the development of effective and sustainable technologies for water treatment is of pivotal importance for future generations. A number of diff…		2017	10.1007/s11157-016-9416-8
Primc, D; Bartsch, M; Barreca, D; Carraro, G; Maccato, C; Sada, C; Niederberger, M	Doping of TiO2 as a tool to optimize the water splitting efficiencies of titania-hematite photoanodes	SUSTAINABLE ENERGY & FUELS	Simple metal oxides such as hematite and titania draw tremendous interest as materials for photoelectrochemical (PEC) water splitting photoelectrodes to produce hydrogen as a clean and sustainable energy carrier. However, the high recombination rates of the photogenerated charges limit their application. Herein, we report on highly efficient and stable composite titania-hematite photoanodes prepa…	Barreca, Davide/0000-0002-8779-3386; Maccato, Chiara/0000-0001-6368-5754; Niederberger, Markus/0000-0001-6058-1183	2017	10.1039/c7se00005g
Minguzzi, A; Naldoni, A; Lugaresi, O; Achilli, E; D'Acapito, F; Malara, F; Locatelli, C; Vertova, A; Rondinini, S; Ghigna, P	Observation of charge transfer cascades in alpha-Fe2O3/IrOx photoanodes by operando X-ray absorption spectroscopy	PHYSICAL CHEMISTRY CHEMICAL PHYSICS	Electrochemical devices for energy conversion and storage are central for a sustainable economy. The performance of electrodes is driven by charge transfer across different layer materials and an understanding of the mechanistics is pivotal to gain improved efficiency. Here, we directly observe the transfer of photogenerated charge carriers in a photoanode made of hematite (alpha-Fe2O3) and a hyd…	Vertova, Alberto/0000-0003-3858-9730; Ghigna, Paolo/0000-0002-8680-7272; d'Acapito, francesco/0000-0003-2207-6113; Minguzzi, Alessandro/0000-0002-8130-4465; ACHILLI, ELISABETTA/0000-0001-9368-0321	2017	10.1039/c6cp08053g
Bella, F; Galliano, S; Falco, M; Viscardi, G; Barolo, C; Gratzel, M; Gerbaldi, C	Approaching truly sustainable solar cells by the use of water and cellulose derivatives	GREEN CHEMISTRY	Aqueous dye-sensitized solar cells (DSSCs) are emerging as the first truly safe, cheap and eco-friendly photovoltaic technology, at the same time overcoming the well-known instability upon moisture/water contamination typical of many solar cells. While many aqueous DSSCs recently proposed still contain little amounts of organic solvents or petroleum-derived polymeric matrices, here we propose the…	Barolo, Claudia/0000-0003-0627-2579; Nazeeruddin, Mohammad K/0000-0001-5955-4786; Bella, Federico/0000-0002-2282-9667; Gerbaldi, Claudio/0000-0002-8084-0143	2017	10.1039/c6gc02625g
Messina, F; Ferone, C; Molino, A; Roviello, G; Colangelo, F; Molino, B; Cioffi, R	Synergistic recycling of calcined clayey sediments and water potabilization sludge as geopolymer precursors: Upscaling from binders to precast paving cement-free bricks	CONSTRUCTION AND BUILDING MATERIALS	The building materials industry is facing relevant challenges in terms of sustainability requirements. The same challenge is expected for other anthropogenic activities such as reservoir management. In this study, in the light of industrial ecology approach, two wastes, namely clayey sediments and water potabilization sludge, generated through reservoir life cycle, were used in a synergistic way …	molino, bruno/0000-0001-8013-6378; Ferone, Claudio/0000-0002-8660-3771; molino, antonio/0000-0001-6966-9640; Cioffi, Raffaele/0000-0002-7757-6361	2017	10.1016/j.conbuildmat.2016.12.039
Boldrini, CL; Manfredi, N; Perna, FM; Trifiletti, V; Capriati, V; Abbotto, A	Dye-Sensitized Solar Cells that use an Aqueous Choline Chloride-Based Deep Eutectic Solvent as Effective Electrolyte Solution	ENERGY TECHNOLOGY	Dye-sensitized solar cells (DSSCs) that use an aqueous (40% w/w water content) choline chloride based deep eutectic solvent as an electrolyte medium have been investigated. The joint combination of the eutectic mixture and an appropriate hydrophilic sensitizer afforded a DSSC with a power conversion efficiency comparable to that using the same electrolyte composition but with conventional, toxic,…	Manfredi, Norberto/0000-0002-3802-1953; Trifiletti, Vanira/0000-0003-4066-3426; Capriati, Vito/0000-0003-4883-7128; Perna, Filippo/0000-0002-8735-8165; Abbotto, Alessandro/0000-0002-0165-5581	2017	10.1002/ente.201600420
Natile, MM; Eger, G; Batocchi, P; Mauuy, F; Glisenti, A	Strontium and copper doped LaCoO3: New cathode materials for solid oxide fuel cells?	INTERNATIONAL JOURNAL OF HYDROGEN ENERGY	In the field of solid state electrochemistry, lanthanum cobaltites are very good electronic conductors used as SOFC cathode materials. In this work, Sr and Cu-doped LaCoO3 perovskites (LaCo0.5Cu0.5O3-delta, La0.5Sr0.5Co0.5Cu0.5O3-delta) have been prepared by means of the citrate route procedure and investigated. XRD confirms the formation of the desired phase and no secondary phases are detected.…	Glisenti, Antonella/0000-0003-4334-2150; Natile, Marta Maria/0000-0001-5591-2670	2017	10.1016/j.ijhydene.2016.09.127
Zanoletti, A; Federici, S; Borgese, L; Bergese, P; Ferroni, M; Depero, LE; Bontempi, E	Embodied energy as key parameter for sustainable materials selection: The case of reusing coal fly ash for removing anionic surfactants	JOURNAL OF CLEANER PRODUCTION	Coal fly ash (CFA) is an industrial by-product derived from coal combustion in thermal power plants. This abundant and low cost by-product is generally reemployed as an additive in the building industry. This work explores the possibility of recovering CFA as an adsorbing material for the removal of anionic surfactants dissolved in water, on the basis of data about concerning its embodied energy.…	Ferroni, Matteo/0000-0002-4231-9162; FEDERICI, Stefania/0000-0001-7118-8766; Bontempi, Elza/0000-0003-1656-7506; BERGESE, Paolo/0000-0002-4652-2168; Zanoletti, Alessandra/0000-0003-0225-7048; Depero, Laura Eleonora/0000-0001-7818-3212	2017	10.1016/j.jclepro.2016.09.070
Scarponi, C; Santulli, C; Sarasini, F; Tirillo, J	Green composites for aircraft interior panels	INTERNATIONAL JOURNAL OF SUSTAINABLE AVIATION	In recent years, a rapid growth in the research and innovation in the natural fibre composites (NFCs) sector has been experienced. The application of NFCs can in principle reduce environmental impact of synthetic fibre composites, such as fibreglass, mainly because of the renewable nature of fibres of vegetable origin. Costs would not be excessive especially in the case the fibres are a part of a…	Tirillo', Jacopo/0000-0001-5734-7396	2017	10.1504/IJSA.2017.086848
Righetto, M; Privitera, A; Franco, L; Bozio, R	Optical Excitation Dynamics at Hetero-Interfaces Fullerene/Quantum Dots	ORGANIC, HYBRID, AND PEROVSKITE PHOTOVOLTAICS XVIII	Embedding Semiconductor Quantum Dots (QDs) into hybrid organic-inorganic solar cell holds promises for improving photovoltaic performances. Thanks to their strong coupling with electro-magnetic radiation field, QDs represent paradigmatic photon absorbers. Nevertheless, the quest for suitable charge separating hetero-interfaces is still an open challenge. Within this framework, the excited state i…	Righetto, Marcello/0000-0001-5507-1445; Bozio, Renato/0000-0001-7274-9190; Privitera, Alberto/0000-0002-7062-8077	2017	10.1117/12.2273369
Olivo, A; Ghedini, E; Pinna, F; Marchese, D; Signoretto, M; Cruciani, G; Manzoli, M	Tuning the Synthetic Parameters to Obtain Smart C-N Co-Doped Titania Photocatalysts for NOx Abatement	CHEMISTRYSELECT	Global society is constantly seeking for sustainable and effective processes to fight environmental pollution. The abatement of NOx, a class of hazardous contaminants, can be performed by means of photocatalytic oxidation using titania-based photocatalysts. Non-metal doping is highly desirable for an efficient exploitation of solar light. The co-presence of nitrogen and carbon represents an appea…	Cruciani, Giuseppe/0000-0002-4269-697X	2017	10.1002/slct.201601719
Valenti, G; Boni, A; Melchionna, M; Cargnello, M; Nasi, L; Bertoni, G; Gorte, RJ; Marcaccio, M; Rapino, S; Bonchio, M; Fornasiero, P; Prato, M; Paolucci, F	Co-axial heterostructures integrating palladium/titanium dioxide with carbon nanotubes for efficient electrocatalytic hydrogen evolution	NATURE COMMUNICATIONS	Considering the depletion of fossil-fuel reserves and their negative environmental impact, new energy schemes must point towards alternative ecological processes. Efficient hydrogen evolution from water is one promising route towards a renewable energy economy and sustainable development. Here we show a tridimensional electrocatalytic interface, featuring a hierarchical, co-axial arrangement of a…	Melchionna, Michele/0000-0001-9813-9753; Fornasiero, Paolo/0000-0003-1082-9157; Bertoni, Giovanni/0000-0001-6424-9102; Valenti, Giovanni/0000-0002-6223-2072; Prato, Maurizio/0000-0002-8869-8612; Fornasiero, Paolo/0000-0003-1082-9157; Cargnello, Matteo/0000-0002-7344-9031; BONI, Alessandro/0000-0003-2397-9242; biomaGUNE, CIC/0000-0001-7690-0660	2016	10.1038/ncomms13549
Fortunati, E; Rescignano, N; Botticella, E; La Fiandra, D; Renzi, M; Mazzaglia, A; Torre, L; Kenny, JM; Balestra, GM	Effect of poly(DL-lactide-co-glycolide) nanoparticles or cellulose nanocrystals-based formulations on Pseudomonas syringae pv. tomato (Pst) and tomato plant development	JOURNAL OF PLANT DISEASES AND PROTECTION	Nanotechnology can change the scenario of current tools minimizing the chemical inputs in plant protection. Here, novel poly(DL-lactide-co-glycolide acid) (PLGA) copolymer-based biopolymeric nanoparticles (NP) and cellulose nanocrystals (CNC) were evaluated as basic materials for their use as nanocarriers to develop innovative plant protection formulations. PLGA NP were synthesized and tested, an…	Mazzaglia, Angelo/0000-0002-1295-2565; agraria, ermelinda botticella/0000-0002-2532-033X; KENNY, JOSE/0000-0001-6329-3048; TORRE, Luigi/0000-0001-7872-5712	2016	10.1007/s41348-016-0036-x
Cimino, A; Moscatelli, F; Ferretti, F; Ragaini, F; Germain, S; Hannedouche, J; Schulz, E; Luconi, L; Rossin, A; Giambastiani, G	Novel yttrium and zirconium catalysts featuring reduced Ar-BIANH(2) ligands for olefin hydroamination (Ar-BIANH(2) = bis-arylaminoacenaphthylene)	NEW JOURNAL OF CHEMISTRY	The novel class of bis-arylaminoacenaphthylenes (Ar-BIANH(2)) was employed for the preparation of zirconium and yttrium complexes to be used as catalysts for cyclohydroamination of a number of primary and secondary aminoalkenes. The complex [(2,6-iPr(2)C(6)H(3)-BIAN)Zr(NMe2)(2)(eta(1)-NHMe2)] was isolated and completely characterized, including X-ray diffraction analysis. Despite its easy and alm…	Ragaini, Fabio/0000-0002-7803-322X; Ferretti, Francesco/0000-0001-8672-4111; Rossin, Andrea/0000-0002-1283-2803; Hannedouche, Jerome/0000-0001-5278-3906; Hannedouche, Jerome/0000-0001-5278-3906; Giambastiani, Giuliano/0000-0002-0315-3286; Schulz, Emmanuelle/0000-0002-0844-8825; Luconi, Lapo/0000-0003-4407-6026	2016	10.1039/c6nj02199a
Verdolotti, L; Oliviero, M; Lavorgna, M; Iannace, S; Camino, G; Vollaro, P; Frache, A	On revealing the effect of alkaline lignin and ammonium polyphosphate additives on fire retardant properties of sustainable zein-based composites	POLYMER DEGRADATION AND STABILITY	The paper deals with the evaluation of the efficacy of both ammonium polyphosphate, APP, and alkaline lignin, AL, as suitable additives for the development of innovative and sustainable composites based on thermo-plasticized zein, TPZ. The chemical and physical interactions which occur between AL and APP and the secondary structure of thermo-plasticized zein were investigated by torque analysis a…	Lavorgna, Marino/0000-0002-4705-4378; Frache, Alberto/0000-0002-2572-3235	2016	10.1016/j.polymdegradstab.2016.10.001
Frattini, D; Cinti, G; Bidini, G; Desideri, U; Cioffi, R; JanneIli, E	A system approach in energy evaluation of different renewable energies sources integration in ammonia production plants	RENEWABLE ENERGY	A sustainable pathway for ammonia synthesis by means of the Haber-Bosch process should reduce or zero out the use of fossil fuels, taking advantage of renewable sources. Using renewable energy systems, hydrogen can be obtained from biomass gasification, biogas reforming or electrolysis of water with electricity generated by solar or wind energy. The scale-up of the concept is not an easy issue. F…	Frattini, Domenico/0000-0001-6116-5608; Desideri, Umberto/0000-0001-7360-5762; Cinti, Giovanni/0000-0002-3358-209X; Cioffi, Raffaele/0000-0002-7757-6361	2016	10.1016/j.renene.2016.07.040
Cecconi, B; Manfredi, N; Montini, T; Fornasiero, P; Abbotto, A	Dye-Sensitized Solar Hydrogen Production: The Emerging Role of Metal-Free Organic Sensitizers	EUROPEAN JOURNAL OF ORGANIC CHEMISTRY	The production of hydrogen from sunlight and water is finding an increasingly important role in the production of clean fuels from sustainable and abundant energy sources. In this process, commonly referred to as artificial photosynthesis, the role of the dye sensitizer is critical for optimizing the harvesting of visible light and triggering the reduction reaction at the catalytic active site. I…	Fornasiero, Paolo/0000-0003-1082-9157; Fornasiero, Paolo/0000-0003-1082-9157; Manfredi, Norberto/0000-0002-3802-1953; MONTINI, Tiziano/0000-0001-9515-566X; Abbotto, Alessandro/0000-0002-0165-5581	2016	10.1002/ejoc.201600653
Rossetti, I; Compagnoni, M; Finocchio, E; Ramis, G; Di Michele, A; Zucchini, A; Dzwigaj, S	Syngas production via steam reforming of bioethanol over Ni-BEA catalysts: A BTL strategy	INTERNATIONAL JOURNAL OF HYDROGEN ENERGY	In this work we focused on syngas production from bioethanol, achieving proper H-2/CO = 2 ratio to feed the FT reaction. The catalysts were constituted by Ni supported over BEA zeolites. The Si/Al ratio was varied to assess the effect of acidity on catalyst activity, selectivity and stability. As well, the effect of Ni loading (0.6-4 wt%) was investigated. Ni confinement into the zeolite pores pr…	ZUCCHINI, AZZURRA/0000-0002-5603-8353; Rossetti, Ilenia/0000-0001-5882-5011; FINOCCHIO, ELISABETTA/0000-0002-7385-3026	2016	10.1016/j.ijhydene.2016.07.149
Benassi, L; Pasquali, M; Zanoletti, A; Dalipi, R; Borgese, L; Depero, LE; Vassura, I; Quina, MJ; Bontempi, E	Chemical Stabilization of Municipal Solid Waste Incineration Fly Ash without Any Commercial Chemicals: First Pilot-Plant Scaling Up	ACS SUSTAINABLE CHEMISTRY & ENGINEERING	For the first time in Europe, results of chemical stabilization of municipal solid waste incineration (MSWI) fly ash, realized as a pilot plant, are reported. The stabilization technology is based on the use of only waste and byproduct materials (such as coal fly ash, flue gas desulfurization residues, and rice husk ash). In the frame of the COSMOS-RICE project, a pilot plant was built in Italy, …	Bontempi, Elza/0000-0003-1656-7506; Quina, Margarida J/0000-0002-9651-2427; Depero, Laura Eleonora/0000-0001-7818-3212; Zanoletti, Alessandra/0000-0003-0225-7048; Dalipi, Rogerta/0000-0002-3430-5510; Vassura, Ivano/0000-0002-0877-9405	2016	10.1021/acssuschemeng.6b01294
Del Curto, B; Barelli, N; Profaizer, M; Fare, S; Tanzi, MC; Cigada, A; Ognibene, G; Recca, G; Cicala, G	Poly-paper: a sustainable material for packaging, based on recycled paper and recyclable with paper	JOURNAL OF APPLIED BIOMATERIALS & FUNCTIONAL MATERIALS	Background: Until now, environmental sustainability issues are almost entirely unsolved for packaging materials. With the final aim of finding materials with a single recycling channel, cellulose fiber/poly(vinyl) alcohol composites were investigated. Methods: After extrusion and injection molding, samples of composite with different cellulose fiber content (30%, 50% and 70% w/w) were tested. Res…	Tanzi, Maria Cristina/0000-0002-4913-6633; Cicala, Gianluca/0000-0002-4680-152X; OGNIBENE, Giulia/0000-0003-3834-0062; Recca, Giuseppe/0000-0002-5451-9954	2016	10.5301/jabfm.5000335
Salmeia, KA; Gaan, S; Malucelli, G	Recent Advances for Flame Retardancy of Textiles Based on Phosphorus Chemistry	POLYMERS	This paper aims at updating the progress on the phosphorus-based flame retardants specifically designed and developed for fibers and fabrics (particularly referring to cotton, polyester and their blends) over the last five years. Indeed, as clearly depicted by Horrocks in a recent review, the world of flame retardants for textiles is still experiencing some changes that are focused on topics like…	Malucelli, Giulio/0000-0002-0459-7698; Salmeia, Khalifah/0000-0003-2541-9652	2016	10.3390/polym8090319
Baran, T; Wojtyla, S; Lenardi, C; Vertova, A; Ghigna, P; Achilli, E; Fracchia, M; Rondinini, S; Minguzzi, A	An Efficient CuxO Photocathode for Hydrogen Production at Neutral pH: New Insights from Combined Spectroscopy and Electrochemistry	ACS APPLIED MATERIALS & INTERFACES	Light-driven water splitting is one of the most promising approaches for using solar energy in light of more sustainable development. In this paper, a highly efficient p-type copper(II) oxide photocathode is studied. The material, prepared by thermal treatment of CuI nanoparticles, is initially partially reduced upon working conditions and soon reaches a stable form. Upon visible-light illuminati…	Rondinini, Sandra/0000-0002-1585-7221; Baran, Tomasz/0000-0002-5140-3155; Minguzzi, Alessandro/0000-0002-8130-4465; Ghigna, Paolo/0000-0002-8680-7272; Vertova, Alberto/0000-0003-3858-9730; Lenardi, Cristina/0000-0002-5522-6803; Fracchia, Martina/0000-0001-5366-153X; ACHILLI, ELISABETTA/0000-0001-9368-0321	2016	10.1021/acsami.6b03345
Abate, S; Barbera, K; Giglio, E; Deorsola, F; Bensaid, S; Perathoner, S; Pirone, R; Centi, G	Synthesis, Characterization, and Activity Pattern of Ni-Al Hydrotalcite Catalysts in CO2 Methanation	INDUSTRIAL & ENGINEERING CHEMISTRY RESEARCH	Two nickel-aluminum hydrotalcite samples (HTLCs) were prepared by a coprecipitation method at different pH values and investigated as catalysts for the hydrogenation of carbon dioxide. The newly synthesized samples have been compared with a reference alumina supported nickel-based commercial catalyst, with equal nickel content. The as-prepared and commercial samples were characterized by BET anal…	Perathoner, Siglinda/0000-0001-8814-1972; Abate, Salvatore/0000-0001-6935-7372; Centi, Gabriele/0000-0001-5626-9840; ABATE, salvatore/0000-0001-6935-7372; GIGLIO, EMANUELE/0000-0003-0480-0905; DEORSOLA, FABIO ALESSANDRO/0000-0002-1492-5405; Barbera, Katia/0000-0003-3072-6905	2016	10.1021/acs.iecr.6b01581
Fortunati, E; Luzi, F; Dugo, L; Fanali, C; Tripodo, G; Santi, L; Kenny, JM; Torre, L; Bernini, R	Effect of hydroxytyrosol methyl carbonate on the thermal, migration and antioxidant properties of PVA-based films for active food packaging	POLYMER INTERNATIONAL	Hydroxytyrosol methyl carbonate (HTyr-MC), a synthetic non-cytotoxic hydroxytyrosol-derived compound showing excellent antioxidant capacity, was obtained in high yield and purity by an ecofriendly procedure and used as active ingredient for poly(vinyl alcohol) (PVA) matrix. Novel PVA/HTyr-MC binary films were developed by solvent casting in water adding 2%, 5% and 10% by weight of HTyr-MC to PVA.…	KENNY, JOSE/0000-0001-6329-3048; BERNINI, Roberta/0000-0002-2548-3876; Luzi, Francesca/0000-0001-8785-5033; TORRE, Luigi/0000-0001-7872-5712	2016	10.1002/pi.5090
Fortunati, E; Yang, W; Luzi, F; Kenny, J; Torre, L; Puglia, D	Lignocellulosic nanostructures as reinforcement in extruded and solvent casted polymeric nanocomposites: an overview	EUROPEAN POLYMER JOURNAL	Lignocellulosic nanostructures, mainly cellulose and lignin based materials, have recently attracted much attention due to their renewable nature, wide variety of source materials available throughout the world, low cost and density, high surface functionality and reactivity. The exceptional mechanical strength, together with high aspect ratio and large surface area, enable these. nanomaterials t…	Puglia, Debora/0000-0001-8515-7813; KENNY, JOSE/0000-0001-6329-3048; TORRE, Luigi/0000-0001-7872-5712; Luzi, Francesca/0000-0001-8785-5033	2016	10.1016/j.eurpolymj.2016.04.013
Guarienti, M; Cardozo, SM; Borgese, L; Lira, GR; Depero, LE; Bontempi, E; Presta, M	COSMOS-rice technology abrogates the biotoxic effects of municipal solid waste incinerator residues	ENVIRONMENTAL POLLUTION	Fly ashes generated by municipal solid waste incinerator (MSWI) are classified as hazardous waste and usually landfilled. For the sustainable reuse of these materials is necessary to reduce the resulting impact on human health and environment. The COSMOS-rice technology has been recently proposed for the treatment of fly ashes mixed with rice husk ash, to obtain a low-cost composite material with…	Bontempi, Elza/0000-0003-1656-7506; Depero, Laura Eleonora/0000-0001-7818-3212; borgese, laura/0000-0003-3486-2656	2016	10.1016/j.envpol.2016.04.053
Roviello, G; Ricciotti, L; Tarallo, O; Ferone, C; Colangelo, F; Roviello, V; Cioffi, R	Innovative Fly Ash Geopolymer-Epoxy Composites: Preparation, Microstructure and Mechanical Properties	MATERIALS	The preparation and characterization of composite materials based on geopolymers obtained from fly ash and epoxy resins are reported for the first time. These materials have been prepared through a synthetic method based on the concurrent reticulation of the organic and inorganic components that allows the formation of hydrogen bonding between the phases, ensuring a very high compatibility betwee…	Ferone, Claudio/0000-0002-8660-3771; Tarallo, Oreste/0000-0001-5952-523X; Cioffi, Raffaele/0000-0002-7757-6361; Roviello, Valentina/0000-0001-7340-8101	2016	10.3390/ma9060461
Beltram, A; Romero-Ocana, I; Jaen, JJD; Montini, T; Fornasiero, P	Photocatalytic valorization of ethanol and glycerol over TiO2 polymorphs for sustainable hydrogen production	APPLIED CATALYSIS A-GENERAL	Photocatalytic reforming of renewable raw materials in aqueous solutions represents a valid possibility for the valorization of wastes from agricultural and industrial processes. In this study, we prepared TiO2 materials with different phase compositions by changing the urea/Ti molar ratio employed during the hydrothermal preparation method. After deposition of Pt nanoparticles, the photocatalyti…	Jaen, Juan Jose Delgado/0000-0001-7956-1166; Fornasiero, Paolo/0000-0003-1082-9157; Fornasiero, Paolo/0000-0003-1082-9157; Romero, Ismael/0000-0001-6573-6711; MONTINI, Tiziano/0000-0001-9515-566X	2016	10.1016/j.apcata.2015.09.022
Xu, JY; Kan, YH; Huang, R; Zhang, BS; Wang, BL; Wu, KH; Lin, YM; Sun, XY; Li, QF; Centi, G; Su, DS	Revealing the Origin of Activity in Nitrogen-Doped Nanocarbons towards Electrocatalytic Reduction of Carbon Dioxide	CHEMSUSCHEM	Carbon nanotubes (CNTs) are functionalized with nitrogen atoms for reduction of carbon dioxide (CO2). The investigation explores the origin of the catalyst's activity and the role of nitrogen chemical states therein. The catalysts show excellent performances, with about 90% current efficiency for CO formation and stability over 60 hours. The Tafel analyses and density functional theory calculatio…	Kan, Yu-He/0000-0002-2082-6796; Centi, Gabriele/0000-0001-5626-9840; Wang, Bo-Lun/0000-0002-1235-686X; Huang, Rui/0000-0002-3276-6137; Zhang, Bingsen/0000-0002-2607-2999; Li, Qingfeng/0000-0002-5460-055X; Sun, Xiaoyan/0000-0003-0035-8371; Wu, Kuang-Hsu (Tim)/0000-0002-7670-7948	2016	10.1002/cssc.201600202
Ampelli, C; Genovese, C; Centi, G; Passalacqua, R; Perathoner, S	Nanoscale Engineering in the Development of Photoelectrocatalytic Cells for Producing Solar Fuels	TOPICS IN CATALYSIS	Engineering at the nanoscale level is a key aspect for the design of novel devices for sustainable energy to address the changeover from fossil fuels to renewable energy sources. This perspective paper, after introducing this topic, analyses the design and development of photoelectrocatalytic cells for producing solar fuels. To overcome limitations in the design of photoelectrocatalytic cells, a …	Perathoner, Siglinda/0000-0001-8814-1972; GENOVESE, Chiara/0000-0002-4939-2442; Passalacqua, Rosalba/0000-0002-5796-1000; Centi, Gabriele/0000-0001-5626-9840; Ampelli, Claudio/0000-0001-7048-976X	2016	10.1007/s11244-016-0547-5
Abate, S; Mebrahtu, C; Giglio, E; Deorsola, F; Bensaid, S; Perathoner, S; Pirone, R; Centi, G	Catalytic Performance of gamma-Al2O3-ZrO2-TiO2-CeO2 Composite Oxide Supported Ni-Based Catalysts for CO2 Methanation	INDUSTRIAL & ENGINEERING CHEMISTRY RESEARCH	Composite oxide supported Ni-based catalysts were prepared by a wet impregnation technique and applied to the methanation of carbon dioxide. The composite oxide supports were prepared by an impregnation-precipitation method using commercial gamma-Al2O3 powder as a host with variation of the percentage of loading of ZrO2, TiO2, and CeO2 promoters from their respective Salt precursors. NH4OH was us…	Centi, Gabriele/0000-0001-5626-9840; Perathoner, Siglinda/0000-0001-8814-1972; ABATE, salvatore/0000-0001-6935-7372; Abate, Salvatore/0000-0001-6935-7372; Mebrahtu, Chalachew/0000-0001-6122-0937; DEORSOLA, FABIO ALESSANDRO/0000-0002-1492-5405; GIGLIO, EMANUELE/0000-0003-0480-0905	2016	10.1021/acs.iecr.6b00134
Cargnello, M; Montini, T; Smolin, SY; Priebe, JB; Jaen, JJD; Doan-Nguyen, VVT; McKay, IS; Schwalbe, JA; Pohl, MM; Gordon, TR; Lu, YP; Baxter, JB; Bruckner, A; Fornasiero, P; Murray, CB	Engineering titania nanostructure to tune and improve its photocatalytic activity	PROCEEDINGS OF THE NATIONAL ACADEMY OF SCIENCES OF THE UNITED STATES OF AMERICA	Photocatalytic pathways could prove crucial to the sustainable production of fuels and chemicals required for a carbon-neutral society. Electron-hole recombination is a critical problem that has, so far, limited the efficiency of the most promising photocatalytic materials. Here, we show the efficacy of anisotropy in improving charge separation and thereby boosting the activity of a titania (TiO2…	Jaen, Juan Jose Delgado/0000-0001-7956-1166; Doan-Nguyen, Vicky/0000-0003-4204-3271; Fornasiero, Paolo/0000-0003-1082-9157; Fornasiero, Paolo/0000-0003-1082-9157; Baxter, Jason/0000-0001-8702-3915; Cargnello, Matteo/0000-0002-7344-9031; Bruckner, Angelika/0000-0003-4647-1273; MONTINI, Tiziano/0000-0001-9515-566X	2016	10.1073/pnas.1524806113
Pegoretti, A; Dorigato, A; Biani, A; Slouf, M	Cyclic olefin copolymer-silica nanocomposites foams	JOURNAL OF MATERIALS SCIENCE	A cyclic olefin copolymer (COC) matrix was melt compounded with various amounts of fumed silica nanoparticles (1, 3 and 5 vol%) and the resulting materials were foamed through supercritical carbon dioxide. Foams were produced at four different foaming pressures (90, 110, 130, and 150 bar), keeping all other processing parameters constant. The main physical properties of both bulk and foamed sampl…	Pegoretti, Alessandro/0000-0001-9641-9735; Slouf, Miroslav/0000-0003-1528-802X	2016	10.1007/s10853-015-9710-9
Campo, M; Pinelli, P; Romani, A	Hydrolyzable Tannins from Sweet Chestnut Fractions Obtained by a Sustainable and Eco-friendly Industrial Process	NATURAL PRODUCT COMMUNICATIONS	Sweet Chestnut (Castanea saliva Mill.) wood extracts, rich in Hydrolyzable Tannins (HTs), are traditionally used in the tanning and textile industries, but recent studies suggest additional uses. The aim of this work is the HPLC-DAD-ESI-MS characterization of Sweet Chestnut aqueous extracts and fractions obtained through a membrane separation technology system without using other solvents, and th…		2016
Aloui, H; Khwaldia, K; Hamdi, M; Fortunati, E; Kenny, JM; Buonocore, GG; Lavorgna, M	Synergistic Effect of Halloysite and Cellulose Nanocrystals on the Functional Properties of PVA Based Nanocomposites	ACS SUSTAINABLE CHEMISTRY & ENGINEERING	Poly(vinyl alcohol) (PVA) based nanocomposites filled with different amounts of halloysites (HNTs) and/or cellulose nanocrystals (CNC) were produced and characterized in terms of mechanical and barrier properties, thermal stability, and transparency. A significant increase in tensile strength by more than 70% and an unexpected improvement in elongation at break were observed for all the PVA nanoc…	KENNY, JOSE/0000-0001-6329-3048; Lavorgna, Marino/0000-0002-4705-4378; , Khaoula/0000-0001-9715-5866; aloui, hajer/0000-0002-2953-3148	2016	10.1021/acssuschemeng.5b00806
Taurino, R; Barbieri, L; Bondioli, F	Surface properties of new green building material after TiO2-SiO2 coatings deposition	CERAMICS INTERNATIONAL	The aim of this study was the surface functionalization of a new green ceramic material, obtained using packaging glass waste (PGW), to improve its cleanability. This objective was reached through the deposition by air-brushing of a nanostructured coating based on titania-silica sol-gel suspension. The coatings were deposited on both glazed and unglazed ceramic substrates and the thermal treatmen…	Bondioli, Federica/0000-0002-4507-3831; Barbieri, Luisa/0000-0002-0103-0207; taurino, rosa/0000-0001-7834-9948	2016	10.1016/j.ceramint.2015.12.002
Ba, H; Liu, YF; Lai, TP; Cuong, DV; Nhut, JM; Nguyen, DL; Ersen, O; Tuci, G; Giambastiani, G; Cuong, PH	N-Doped Food-Grade-Derived 3D Mesoporous Foams as Metal-Free Systems for Catalysis	ACS CATALYSIS	A challenging task of modern and sustainable catalysis is to rethink key processes at the heart of renewable energy technology in light of metal-free catalytic architectures designed and fabricated from cheap and easily accessible building blocks. This contribution describes the synthesis of highly N doped, carbon nanotube (CNT)-netting composites from cheap raw materials. With physical mixtures …	Liu, Yuefeng/0000-0001-9823-3811; Giambastiani, Giuliano/0000-0002-0315-3286; Ersen, Ovidiu/0000-0002-1553-0915; Tuci, Giulia/0000-0002-3411-989X; Housseinou, BA/0000-0001-6263-0671	2016	10.1021/acscatal.6b00101
Perathoner, S; Centi, G; Su, DS	Turning Perspective in Photoelectrocatalytic Cells for Solar Fuels	CHEMSUSCHEM	The development of new devices for the use and storage of solar energy is a key step to enable a new sustainable energy scenario. The route for direct solar-to-chemical energy transformation, especially to produce liquid fuels, represents a necessary element to realize transition from the actual energy infrastructure. Photoelectrocatalytic (PECa) devices for the production of solar fuels are a ke…	Centi, Gabriele/0000-0001-5626-9840; Perathoner, Siglinda/0000-0001-8814-1972	2016	10.1002/cssc.201501059
Pol, R; Guerrero, M; Garcia-Lecina, E; Altube, A; Rossinyol, E; Garroni, S; Baro, MD; Pons, J; Sort, J; Pellicer, E	Ni-, Pt- and (Ni/Pt)-doped TiO2 nanophotocatalysts: A smart approach for sustainable degradation of Rhodamine B dye	APPLIED CATALYSIS B-ENVIRONMENTAL	Ni (1 wa%)-, Pt (1 wt%)- and [Ni (0.5 wt%)/Pt (0.5 wt%)]-doped TiO2 nanoporous catalysts have been successfully obtained through a facile two-step hydrothermal route. TiO2 crystallizes mostly in the anatase phase and acts as a mesoporous matrix. Meanwhile, Ni, Pt and Ni/Pt dopants form small nanoparticles (NPs) (3-95 nm in diameter) which are hosted by the TiO2 framework. The resulting composites…	Pellicer, Eva/0000-0002-8901-0998; Guerrero, Miguel/0000-0001-8350-8261; Baro, Maria Dolors/0000-0002-8636-1063; Sort, Jordi/0000-0003-1213-3639; Garcia-Lecina, Eva/0000-0001-8915-840X; Garroni, Sebastiano/0000-0001-7686-6589; Altube, Ainhoa/0000-0002-4172-9610; Garroni, Sebastiano/0000-0001-7686-6589; Pol, Roberto/0000-0002-4387-4061	2016	10.1016/j.apcatb.2015.08.006
Morelli, A; Betti, M; Puppi, D; Bartoli, C; Gazzarri, M; Chiellini, F	Enzymatically Crosslinked Ulvan Hydrogels as Injectable Systems for Cell Delivery	MACROMOLECULAR CHEMISTRY AND PHYSICS	The present study represents a challenging effort aiming at converting the waste algal biomass Ulva sp. into a source of high added value materials for biomedical applications by means of a clean and sustainable process. Ulvan, a sulphated polysaccharide extracted from Ulva sp., is investigated as in situ gelling material by using the enzyme horseradish peroxidase as catalyst and H2O2 as reagent.…	Chiellini, Federica/0000-0003-4680-9975; Chiellini, Federica/0000-0003-4680-9975; Puppi, Dario/0000-0002-9251-4388	2016	10.1002/macp.201500353
Centi, G; Passalacqua, R; Perathoner, S	Advanced nanostructured titania photoactive materials for sustainable H-2 production	MATERIALS SCIENCE IN SEMICONDUCTOR PROCESSING	The ability to control the structure of TiO2 in the nanometer scale has opened new opportunities and prospects of technology applications in different fields, in particular for materials for energy and solar fuel applications, either to produce hydrogen or as components of solar cells. After shortly introducing some aspects of the need of new photoactive materials and H-2 production routes to add…	Perathoner, Siglinda/0000-0001-8814-1972; Centi, Gabriele/0000-0001-5626-9840; Passalacqua, Rosalba/0000-0002-5796-1000	2016	10.1016/j.mssp.2015.07.051
Fortunati, E; Torre, L	Cellulose Nanocrystals in Nanocomposite Approach: Green and High-Performance Materials for Industrial, Biomedical and Agricultural Applications	VIII INTERNATIONAL CONFERENCE ON TIMES OF POLYMERS AND COMPOSITES: FROM AEROSPACE TO NANOTECHNOLOGY	The need to both avoid wastes and find new renewable resources has led to a new and promising research based on the possibility to revalorize the biomass producing sustainable chemicals and/or materials which may play a major role in replacing systems traditionally obtained from non-renewable sources. Most of the low-value biomass is termed lignocellulosic, referring to its main constituent biopo…	TORRE, Luigi/0000-0001-7872-5712	2016	10.1063/1.4949586
Cocco, F; Fantauzzi, M; Elsener, B; Rossi, A	Dissolution of brass alloys naturally aged in neutral solutions - an electrochemical and surface analytical study	RSC ADVANCES	The ageing process of brass alloys, the dissolution rate versus time, was studied in artificial saliva (pH 7.4) and in a phosphate buffer solution (pH 7). Mechanically polished brass alloys (Zn content 18-38 wt%) were exposed for 1, 3 and 16 hours to the solutions open to air at room temperature. The open circuit potential (OCP) and linear polarization resistance (R-p) increased asymptotically wi…	Rossi, Antonella/0000-0002-5151-2634; Elsener, Bernhard/0000-0002-9993-7834; Cocco, Federica/0000-0001-7634-8386; Fantauzzi, Marzia/0000-0003-2648-2215	2016	10.1039/c6ra18200c
Abate, S; Giorgianni, G; Lanzafame, P; Perathoner, S; Centi, G	Multifunctional HDO/Selective Cracking Ni/HBEA Catalysts to Produce Jet Fuel and Diesel from Bio-oils	2ND INTERNATIONAL CONFERENCE ON BIOMASS (ICONBM 2016)	The development of multifunctional catalysts to selectively produce in one-step processes jet fuels (around C12) and diesel (around C16-C18) from bio-oils (vegetable and especially algal oil) is still a challenge to produce next-generation biofuels. This topic is addressed here by investigating the activity of Ni based catalysts in the methyl palmitate conversion, as model test reaction. The perf…	Perathoner, Siglinda/0000-0001-8814-1972; Abate, Salvatore/0000-0001-6935-7372; Centi, Gabriele/0000-0001-5626-9840; Giorgianni, Gianfranco/0000-0002-5305-7727; LANZAFAME, PAOLA/0000-0002-6092-346X	2016	10.3303/CET1650044
Cocco, F; Elsener, B; Fantauzzi, M; Atzei, D; Rossi, A	Nanosized surface films on brass alloys by XPS and XAES	RSC ADVANCES	Chemical state identification and quantification based on photoelectron spectra is challenging in the case of copper and zinc and their alloys. In this work an analytical strategy for simultaneous chemical state identification and quantification of copper and zinc chemical states in complex layered systems is presented. This approach is based on the curve fitting of the multicomponent X-ray excit…	Fantauzzi, Marzia/0000-0003-2648-2215; Elsener, Bernhard/0000-0002-9993-7834; Rossi, Antonella/0000-0002-5151-2634; ELSENER, BERNHARD/0000-0002-6855-1584; Cocco, Federica/0000-0001-7634-8386	2016	10.1039/c5ra23135c
Passalacqua, R; Parathoner, S; Centi, G; Halder, A; Tyo, EC; Yang, B; Seifert, S; Vajda, S	Electrochemical behaviour of naked sub-nanometre sized copper clusters and effect of CO2	CATALYSIS SCIENCE & TECHNOLOGY	The study of the electrochemical behavior (in the presence of N-2 or CO2) of size-controlled naked Cu-5 and Cu-20 nanoclusters, prepared using a combination of gas-phase cluster ion sources, mass spectrometry, and soft-landing techniques, evidences some relevant results regarding the redox behavior of these sub-nanometre sized copper particles and the effect of CO2 on them. Cu-20 nanoclusters sho…	Perathoner, Siglinda/0000-0001-8814-1972; Centi, Gabriele/0000-0001-5626-9840; Passalacqua, Rosalba/0000-0002-5796-1000; Vajda, Stefan/0000-0002-1879-2099	2016	10.1039/c6cy00942e
Ampelli, C; Centi, G; Passalacqua, R; Perathoner, S	Electrolyte-less design of PEC cells for solar fuels: Prospects and open issues in the development of cells and related catalytic electrodes	CATALYSIS TODAY	The possibilities and prospects offered from a new electrolyte-less (EL) cell design for photoelectro catalytic (PEC) cells to produce solar fuels, particularly by reduction of CO2, are discussed in this perspective contribution. The concept of EL configuration is presented evidencing the several potential advantages, but also the need to develop novel specific nanostructured electrodes. Some asp…	Passalacqua, Rosalba/0000-0002-5796-1000; Centi, Gabriele/0000-0001-5626-9840; Ampelli, Claudio/0000-0001-7048-976X; Perathoner, Siglinda/0000-0001-8814-1972	2016	10.1016/j.cattod.2015.07.020
Vozniuk, O; Agnoli, S; Artiglia, L; Vassoi, A; Tanchoux, N; Di Renzo, F; Granozzi, G; Cavani, F	Towards an improved process for hydrogen production: the chemical-loop reforming of ethanol	GREEN CHEMISTRY	M-modified ferrospinels with the formula M0.6Fe2.4Oy (M = Co, Mn or Co/Mn) were employed as ionic oxygen and electron carrier materials for an alternative sustainable route to produce hydrogen via chemical-loop reforming of ethanol. The new materials were tested in terms of both redox properties and catalytic activity to generate hydrogen by oxidation with steam, after a reductive step carried ou…	Granozzi, Gaetano/0000-0002-9509-6142; Tanchoux, Nathalie/0000-0002-4265-6740; Di Renzo, Francesco/0000-0002-0515-8128; AGNOLI, STEFANO/0000-0001-5204-5460	2016	10.1039/c5gc02139a
